# Supplementary material
Source: publisher figshare collection journal article supplement (https://gsapubs.figshare.com/articles/dataset/_/20426853)
Supplement: Supplementary file 1 [file 1]

## Sheet: Contents
Sheet	Content
Table S1	Carbonate δ13C (‰ VPDB) and δ18O (‰ VPDB) isotopic results and mean values; descriptions of samples and outcrops; interpretations of depositional environments.
Table S2	Descriptions, interpreted paleoenvironments and references for locations in Fig. 11.
Table S3	U-Pb isotopic data (unknowns)
Table S4	U-Pb Temora-2 standard
Table S5	Statistical analysis of detrital zircon data
Table S6	Location of detrital zircon samples

## Sheet: Table S1 - isotopes, samples
	TABLE S1. CARBONATE δ13C (‰ VPDB) AND δ18O (‰ VPDB) ISOTOPIC RESULTS AND MEAN VALUES; DESCRIPTIONS OF SAMPLES AND OUTCROPS; INTERPRETATIONS OF DEPOSITIONAL ENVIRONMENTS.
Strat. Unit	Age (Ma)	STRAT LEVEL	PMAG LEVEL	Sample	Lat (˚E)	Long (˚N)	Outcrop description	Sample type	interpreted environment	δ13C (‰ VPDB)	error (‰)	δ18O (‰ VPDB)	error (‰)	YEAR	Mean values by age	Isotope	Mean values - type	Mean values	1 std dev
Xiyu Fm.	1.14212	3780					Bulk carbonate samples (paleomag)			-0.23	0.06	-7.32	0.1	2011	14.96-12.34 Ma	δ18O	all	-7.73529	0.769074
Xiyu Fm.	1.17506	3766					Bulk carbonate samples (paleomag)			-0.38	0.03	-7.58	0.07	2011	14.96-12.34 Ma	δ18O	lacustrine	-8.215	0.662714
Xiyu Fm.	1.26918	3726					Bulk carbonate samples (paleomag)			-0.95	0.04	-6.87	0.1	2011	13.6-13.3 Ma	δ18O	lacustrine	-7.4	0.113137
Xiyu Fm.	1.31153	3708					Bulk carbonate samples (paleomag)			0.04	0.05	-5.73	0.1	2011	~13.5 Ma	δ18O	lacustrine	-8.6225	0.251976
Xiyu Fm.	1.33271	3699					Bulk carbonate samples (paleomag)			-0.16	0.06	-5.87	0.08	2011	13.5 to 12.5	δ18O	lacustrine	-8.215	0.662714
Xiyu Fm.	1.38682	3676					Bulk carbonate samples (paleomag)			-0.07	0.06	-7.44	0.07	2011	13.7-11.5 Ma	δ18O	pedogenic	-7.91333	0.23029
Xiyu Fm.	1.43153	3657					Bulk carbonate samples (paleomag)			-0.17	0.04	-7.17	0.1	2011	14.96-5 Ma	δ13C	all	-1.29189	0.617455
Xiyu Fm.	1.50212	3627					Bulk carbonate samples (paleomag)			-0.6	0.04	-7.25	0.1	2011	3-1 Ma	δ13C	all	-0.369778	0.477118
Xiyu Fm.	1.55153	3606					Bulk carbonate samples (paleomag)			-0.4	0.06	-7.15	0.08	2011	11.5-7 Ma	δ18O	all	-8.8699	0.744075
Xiyu Fm.	1.57506	3596					Bulk carbonate samples (paleomag)			-0.22	0.05	-7.87	0.09	2011	14.96-1.14 Ma	δ18O	all	-8.08663	0.985034
Xiyu Fm.	1.61035	3581					Bulk carbonate samples (paleomag)			-0.38	0.06	-6.5	0.08	2011	14.96-1.14 Ma	δ13C	all	-1.03264	0.787076
Xiyu Fm.	1.76565	3515					Bulk carbonate samples (paleomag)			-0.62	0.05	-7.9	0.08	2011	14.96-1.14 Ma	δ18O highest	all	-4.29
Xiyu Fm.	1.81741	3493					Bulk carbonate samples (paleomag)			-0.46	0.05	-7.51	0.09	2011	14.96-1.14 Ma	δ18O lowest	all	-10.89
Xiyu Fm.	1.85976	3475					Bulk carbonate samples (paleomag)			-0.38	0.05	-6.34	0.1	2011	14.96-1.14 Ma	δ13C highest	all	1.47
Xiyu Fm.	1.88565	3464					Bulk carbonate samples (paleomag)			-0.76	0.06	-7.85	0.08	2011	14.96-1.14 Ma	δ13C lowest	all	-3.24
Xiyu Fm.	1.92094	3449					Bulk carbonate samples (paleomag)			-0.6	0.04	-8.28	0.1	2011	11.5-7 Ma	δ18O	Bulk carbonate samples	-8.9	0.7
Xiyu Fm.	1.93741	3442					Bulk carbonate samples (paleomag)			-0.61	0.06	-7.12	0.08	2011	10.5-7 Ma	δ18O	Palustrine	-8.6	0.8
Xiyu Fm.	1.97976	3424					Bulk carbonate samples (paleomag)			-0.24	0.05	-6.31	0.1	2011	15-11.5 Ma	δ18O	Bulk carbonate samples	-7.7	0.765221
Xiyu Fm.	2.03624	3400	KN262	16KN20c	39.9417	77.2321	3 cobble sized angular light to medium gray limestone clasts from modern wash. sampled largest angular clast to ensure they are derived from hanging wall of thrust; to evaluate detrital contribution to sed composition	limestone from Tian Shan	detrital marine (Paleozoic limestone)	0.2	0.07	-6.81	0.07	2016
Xiyu Fm.	2.03624	3400					Bulk carbonate samples (paleomag)			-0.44	0.05	-5.86	0.08	2011
Xiyu Fm.	2.04329	3397					Bulk carbonate samples (paleomag)			-0.19	0.05	-7.15	0.1	2011
Xiyu Fm.	2.14682	3353					Bulk carbonate samples (paleomag)			-0.17	0.04	-5.36	0.1	2011
Xiyu Fm.	2.17561	3343					Bulk carbonate samples (paleomag)			-0.48	0.05	-5.67	0.1	2011
Xiyu Fm.	2.23663	3322					Bulk carbonate samples (paleomag)			-0.54	0.04	-5.88	0.1	2011
Xiyu Fm.	2.28894	3304					Bulk carbonate samples (paleomag)			-0.73	0.06	-6.31	0.1	2011
Xiyu Fm.	2.33253	3289					Bulk carbonate samples (paleomag)			-0.18	0.05	-6.46	0.08	2011
Atushi Fm.	2.35578	3281					Bulk carbonate samples (paleomag)			0.13	0.04	-6.46	0.1	2011
Atushi Fm.	2.411	3262					Bulk carbonate samples (paleomag)			-0.22	0.06	-6.8	0.1	2011
Atushi Fm.	2.42843	3256					Bulk carbonate samples (paleomag)			-0.56	0.05	-7.48	0.06	2011
Atushi Fm.	2.45168	3248					Bulk carbonate samples (paleomag)			-0.46	0.05	-6.76	0.1	2011
Atushi Fm.	2.50108	3231					Bulk carbonate samples (paleomag)			-0.4	0.05	-5.85	0.1	2011
Atushi Fm.	2.51852	3225					Bulk carbonate samples (paleomag)			-0.34	0.06	-6.49	0.09	2011
Atushi Fm.	2.54467	3216					Bulk carbonate samples (paleomag)			-0.29	0.02	-5.65	0.08	2011
Atushi Fm.	2.59448	3198					Bulk carbonate samples (paleomag)			-0.21	0.04	-7.34	0.08	2011
Atushi Fm.	2.60919	3192					Bulk carbonate samples (paleomag)			-0.06	0.06	-5.62	0.08	2011
Atushi Fm.	2.63125	3183					Bulk carbonate samples (paleomag)			-0.52	0.06	-7.58	0.07	2011
Atushi Fm.	2.65086	3175					Bulk carbonate samples (paleomag)			-0.46	0.05	-7.7	0.07	2011
Atushi Fm.	2.65821	3172					Bulk carbonate samples (paleomag)			-0.63	0.06	-6.36	0.08	2011
Atushi Fm.	2.68762	3160					Bulk carbonate samples (paleomag)			-0.29	0.06	-6.49	0.08	2011
Atushi Fm.	2.71213	3150					Bulk carbonate samples (paleomag)			-0.48	0.03	-6.89	0.1	2011
Atushi Fm.	2.72439	3145					Bulk carbonate samples (paleomag)			-0.58	0.04	-6.68	0.1	2011
Atushi Fm.	2.74645	3136					Bulk carbonate samples (paleomag)			-0.66	0.05	-6.39	0.1	2011
Atushi Fm.	2.76606	3128					Bulk carbonate samples (paleomag)			-0.51	0.06	-7.45	0.09	2011
Atushi Fm.	2.78076	3122					Bulk carbonate samples (paleomag)			-0.49	0.04	-7.57	0.1	2011
Atushi Fm.	2.81753	3107					Bulk carbonate samples (paleomag)			0.11	0.02	-6.64	0.1	2011
Atushi Fm.	2.83959	3098					Bulk carbonate samples (paleomag)			-0.9	0.06	-8.19	0.1	2011
Atushi Fm.	2.90087	3073					Bulk carbonate samples (paleomag)			-1.84	0.06	-8.34	0.09	2011
Atushi Fm.	2.90822	3070					Bulk carbonate samples (paleomag)			-1.11	0.06	-7.79	0.09	2011
Atushi Fm.	2.93763	3058					Bulk carbonate samples (paleomag)			-2.62	0.05	-6.94	0.1	2011
Atushi Fm.	2.9744	3043					Bulk carbonate samples (paleomag)			-1.44	0.05	-7.2	0.1	2011
Atushi Fm.	3.04277	3017					Bulk carbonate samples (paleomag)			-1.8	0.06	-5.84	0.1	2011
Atushi Fm.	3.09015	3006					Bulk carbonate samples (paleomag)			-2.68	0.04	-7.48	0.09	2011
Atushi Fm.	3.12593	2997					Bulk carbonate samples (paleomag)			-1.17	0.06	-9.06	0.08	2011
Atushi Fm.	3.16564	2985					Bulk carbonate samples (paleomag)			-1.71	0.04	-7.78	0.1	2011
Atushi Fm.	3.26053	2949					Bulk carbonate samples (paleomag)			-1.81	0.06	-7.47	0.09	2011
Atushi Fm.	3.27419	2943					Bulk carbonate samples (paleomag)			-1.27	0.05	-8.13	0.09	2011
Atushi Fm.	3.29469	2934					Bulk carbonate samples (paleomag)			-3.24	0.04	-8.68	0.09	2011
Atushi Fm.	3.31519	2925					Bulk carbonate samples (paleomag)			-2.05	0.06	-8.3	0.1	2011
Atushi Fm.	3.33917	2915					Bulk carbonate samples (paleomag)			-1.5	0.06	-8.15	0.09	2011
Atushi Fm.	3.38372	2898					Bulk carbonate samples (paleomag)			-0.87	0.05	-7.98	0.08	2011
Atushi Fm.	3.44138	2876					Bulk carbonate samples (paleomag)			-1.56	0.05	-8.51	0.1	2011
Atushi Fm.	3.50428	2852	KN211-212	16KN21c	39.9346	77.2247	massive, spheroidal weathering, very calcareous, clay-siltstone, vertical (sparse)reduction zones (blue colr) suggest root interactions, weakly developed soil, calcaroues to top; we sampled 50 cm below top	very calcareous, clay-siltstone	Paleosol (weakly developed soil)	-0.69	0.06	-6.32	0.05	2016
Atushi Fm.	3.61122	2811					Bulk carbonate samples (paleomag)			-0.67	0.06	-7.82	0.06	2011
Atushi Fm.	3.62897	2804					Bulk carbonate samples (paleomag)			-1.06	0.06	-8.01	0.05	2011
Atushi Fm.	3.64419	2798					Bulk carbonate samples (paleomag)			0.35	0.06	-7.78	0.1	2011
Atushi Fm.	3.66702	2789					Bulk carbonate samples (paleomag)			-0.22	0.05	-8.51	0.1	2011
Atushi Fm.	3.68985	2780					Bulk carbonate samples (paleomag)			-0.27	0.04	-7.38	0.1	2011
Atushi Fm.	3.71775	2769					Bulk carbonate samples (paleomag)			-0.21	0.05	-6.39	0.1	2011
Atushi Fm.	3.75073	2756					Bulk carbonate samples (paleomag)			-0.02	0.04	-7.49	0.09	2011
Atushi Fm.	3.76848	2749					Bulk carbonate samples (paleomag)			0.28	0.05	-6.85	0.09	2011
Atushi Fm.	3.81414	2731					Bulk carbonate samples (paleomag)			0.15	0.05	-7.99	0.1	2011
Atushi Fm.	3.8395	2721					Bulk carbonate samples (paleomag)			0.64	0.06	-6.71	0.09	2011
Atushi Fm.	3.85979	2713	KN197-198	16KN22c	39.9326	77.2239	massive white, micritic , forms discontinuous beds of ~2 to 8 cm thick, parallel to bedding, wihin sitstone facies, root tubules suggest close to surface. KN198. Interpreted shallow groundwater carbonate	micritic white/light carbonate	Calcrete (shallow groundwater carbonate)	0.71	0.05	-6.97	0.07	2016
Atushi Fm.	3.90291	2696					Bulk carbonate samples (paleomag)			-0.23	0.05	-7.71	0.1	2011
Atushi Fm.	3.9435	2680	KN193-194	16KN23c	39.9322	77.2236	1 to 7 cm discontinuous thick beds of carbonate, massive light gray, forming within sand to silt-sized units, lenses. 2730m. KN194 Interpreted groundwater carbonates. Form usually in dry climates	carbonate, massive light gray	Calcrete (shallow groundwater carbonate)	1.08	0.05	-7.31	0.06	2016
Atushi Fm.	3.95872	2674					Bulk carbonate samples (paleomag)			0.9	0.06	-8.04	0.1	2011
Atushi Fm.	3.97394	2668					Bulk carbonate samples (paleomag)			-0.28	0.05	-8.55	0.09	2011
Atushi Fm.	3.9993	2658					Bulk carbonate samples (paleomag)			-0.32	0.04	-8.35	0.08	2011
Atushi Fm.	4.00437	2656	KN190	16KN24c	39.9319	77.2236	micritic white/light gray 3 cm thick. Groundwater carbonates. KN190 2m below us.	micritic white/light carbonate	Calcrete (shallow groundwater carbonate)	0.29	0.06	-7.29	0.05	2016
Atushi Fm.	4.01452	2652					Bulk carbonate samples (paleomag)			-0.29	0.03	-8.39	0.1	2011
Atushi Fm.	4.0551	2636					Bulk carbonate samples (paleomag)			-0.75	0.05	-8.16	0.06	2011
Atushi Fm.	4.07539	2628					Bulk carbonate samples (paleomag)			-1.88	0.05	-8.12	0.1	2011
Atushi Fm.	4.07793	2627	KN186-187	16KN25c	39.9315	77.2237	micritic white/light gray 5 cm thick, within silt to very fine s.s. Intepreted shallow gw carbonate. KN187 just below.	micritic white/light carbonate	Calcrete (shallow groundwater carbonate)	1.24	0.05	-7.75	0.07	2016
Atushi Fm.	4.083	2625	KN186-187	16KN26c	39.9313	77.2237	micritic white, 4cm thick within beige massive silstone	micritic white carbonate	Calcrete (shallow groundwater carbonate)	1.47	0.06	-6.85	0.07	2016
Atushi Fm.	4.08909	2622.6					Bulk carbonate samples (paleomag)			-1.21	0.05	-7.86	0.1	2011
Atushi Fm.	4.10583	2616					Bulk carbonate samples (paleomag)			-2.16	0.06	-7.22	0.1	2011
Atushi Fm.	4.11852	2611	KN184	16KN27c	39.931	77.2226	light gray, micritic, 4 cm thick, within beige siltstone. Shallow gw carbonate. KN184, same bed. Root reduction zones ~8 cm above sample.	light gray, micritic carbonate	Calcrete (shallow groundwater carbonate)	1.23	0.06	-8.28	0.07	2016
Atushi Fm.	4.14642	2600	KN182-183	16KN28c	39.9309	77.2224	light gray, micritic ~10cm thick within beige massive siltstone. Interpreted as shallow gw carbonate. KN183, same bed.	light gray, micritic carbonate	Calcrete (shallow groundwater carbonate)	-0.33	0.03	-8.19	0.06	2016
Atushi Fm.	4.16671	2592					Bulk carbonate samples (paleomag)			-0.44	0.06	-8.21	0.09	2011
Atushi Fm.	4.18446	2585	KN181-181.5	16KN29c	39.9306	77.2219	white, micritic, ~5cm thick discontinuous lens, within beige siltstones. Interpreted as shallow groundwater carbonates. Between KN181 and 181.5	white, micritic carbonate	Calcrete (shallow groundwater carbonate)	0.49	0.06	-7.29	0.07	2016
Atushi Fm.	4.18446	2585					Bulk carbonate samples (paleomag)			-2.89	0.06	-7.31	0.1	2011
Atushi Fm.	4.23836	2569	KN179-180	16KN30c	39.9304	77.2209	white, micritic, ~10 cm thick pinching and swelling, whitin beige siltstone. Interpreted as shallow gw carbonate. Between KN179-180	white, micritic carbonate	Calcrete (shallow groundwater carbonate)	0.52	0.06	-7.88	0.08	2016
Atushi Fm.	4.24179	2568					Bulk carbonate samples (paleomag)			0.17	0.06	-6.61	0.09	2011
Atushi Fm.	4.2863	2555	KN177-178	16KN31Ac	39.93	77.2204	Laminated (Lacustrine) silty limestone, 16KN31Ac Massive silty limestone, micritic, 16KN31Bc (Silty limestone or Limey siltstone) From base to top: 60cm of the massive limestone, sparsely laminated 30 cm of the vuggy limestone 20 cm limey laminated mudstone	laminated silty limestone	Lacustrine	0.9	0.04	-8.34	0.07	2016
Atushi Fm.	4.29658	2552					Bulk carbonate samples (paleomag)			-0.22	0.05	-8.51	0.07	2011
Atushi Fm.	4.31016	2547					Bulk carbonate samples (paleomag)			-0.64	0.06	-8.04	0.1	2011
Atushi Fm.	4.33301	2538	KN176-177	16KN32c	39.93	77.2187	2 cm thick light gray micritic CaCO3 within beige massive silstone. Interpreted as shallow ground water carbonate. just above KN176	light gray micritic CaCO	Calcrete (shallow groundwater carbonate)	-1.14	0.05	-7.91	0.06	2016
Atushi Fm.	4.33809	2536					Bulk carbonate samples (paleomag)			-0.94	0.04	-7.96	0.1	2011
Atushi Fm.	4.36095	2527					Bulk carbonate samples (paleomag)			-0.84	0.06	-8.17	0.09	2011
Atushi Fm.	4.36349	2526	KN174-175	16KN33c	39.9296	77.2189	3 cm thick discontinuous lenses of light gray, micritic CaCO3 with beige siltstone. shallow gw CaCO3. Just between KN174 and 175.	light gray, micritic CaCO3	Calcrete (shallow groundwater carbonate)	-1.2	0.06	-7.94	0.05	2016
Atushi Fm.	4.40412	2510					Bulk carbonate samples (paleomag)			-1.38	0.05	-8.26	0.04	2011
Atushi Fm.	4.4092	2508					Bulk carbonate samples (paleomag)			-0.66	0.04	-8.74	0.09	2011
Atushi Fm.	4.43459	2498					Bulk carbonate samples (paleomag)			-0.73	0.05	-9.42	0.09	2011
Atushi Fm.	4.44983	2492	KN170	16KN34c	39.9292	77.219	white micritic, 4 cm silt-rich CaCO3, forming whitin beige silstone, horizontal blue, several mm mottles shallow gw carbonate	white micritic, 4 cm silt-rich CaCO3	Calcrete (shallow groundwater carbonate)	-1.89	0.05	-7.31	0.06	2016
Atushi Fm.	4.48792	2477					Bulk carbonate samples (paleomag)			-2.94	0.06	-7.15	0.1	2011
Atushi Fm.	4.493	2475	KN168	16KN35c	39.929	77.2191	light, micritic CaCO3, discontinuous bed up to 10 cm thick, forming within beige massive siltstone shallow gw carbonate KN168	micritic CaCO3	Calcrete (shallow groundwater carbonate)	-0.68	0.06	-8.74	0.06	2016
Atushi Fm.	4.55039	2454	KN165	16KN36Ac	39.9286	77.2186	A: tabular 2 cm thick gray limestone, micritic, burrows. precipitated within palustrine environment	limestone	Palustrine	0.37	0.05	-7.98	0.06	2016
Atushi Fm.	4.55039	2454	KN165	16KN36Bc	39.9286	77.2186	B: discontinuous lenses of limey siltstone, micritic white/light gray. samples 10 cm below A. shallow gw cement	limey siltstone	Calcrete (shallow groundwater carbonate)	-0.34	0.04	-9.1	0.05	2016
Atushi Fm.	4.55312	2453					Bulk carbonate samples (paleomag)			-1.85	0.06	-7.8	0.09	2011
Atushi Fm.	4.57225	2446					Bulk carbonate samples (paleomag)			-0.77	0.04	-7.14	0.09	2011
Atushi Fm.	4.58864	2440					Bulk carbonate samples (paleomag)			-0.1	0.05	-7.46	0.1	2011
Atushi Fm.	4.63471	2423					Bulk carbonate samples (paleomag)			-1.3	0.05	-7.32	0.08	2011
Atushi Fm.	4.69153	2400	KN158-159	16KN37c	39.928	77.2167	white micritic silty limestone, ~2cm thick discontinuous beds shallow gw cement KN158 AND 159	white micritic silty limestone	Calcrete (shallow groundwater carbonate)	-1.2	0.04	-7.68	0.06	2016
Atushi Fm.	4.71624	2390					Bulk carbonate samples (paleomag)			0	0.04	-8.66	0.09	2011
Atushi Fm.	4.73106	2384	KN157	16KN38c	39.9279	77.2166	white micritc silty limestone ~7cm, thick discontinuous, whitish beige, massive shallow gw cement	white micritc silty limestone	Calcrete (shallow groundwater carbonate)	-1.7	0.06	-8.85	0.08	2016
Atushi Fm.	4.74835	2377					Bulk carbonate samples (paleomag)			-0.86	0.05	-8.74	0.09	2011
Atushi Fm.	4.76318	2371					Bulk carbonate samples (paleomag)			-0.53	0.02	-8.84	0.1	2011
Atushi Fm.	4.77553	2366					Bulk carbonate samples (paleomag)			-0.06	0.04	-8.5	0.1	2011
Atushi Fm.	4.80705	2353	KN153	16KN39c	39.9274	77.2163	white, micritic CaCO3 4-5 cm thick whithin beige siltstone shallow gw cement KN153	white, micritic CaCO3	Calcrete (shallow groundwater carbonate)	0.01	0.07	-7.48	0.08	2016
Atushi Fm.	4.8197	2347.5					Bulk carbonate samples (paleomag)			-0.97	0.06	-7.57	0.07	2011
Atushi Fm.	4.83006	2343					Bulk carbonate samples (paleomag)			-0.72	0.06	-8.62	0.1	2011
Atushi Fm.	4.84156	2338	KN151	16KN40c	39.9271	77.2162	white, micritic CaCO3 3cm thick, discontinuous, with beige siltstone shallow gw CaCO3 cement KN151	white, micritic CaCO3 3cm thick	Calcrete (shallow groundwater carbonate)	-1.04	0.04	-8.2	0.08	2016
Atushi Fm.	4.84846	2335					Bulk carbonate samples (paleomag)			-0.28	0.06	-8.28	0.09	2011
Atushi Fm.	4.86226	2329					Bulk carbonate samples (paleomag)			-0.32	0.06	-9.91	0.1	2011
Atushi Fm.	4.88987	2317					Bulk carbonate samples (paleomag)			-1.26	0.06	-9	0.08	2011
Atushi Fm.	4.90535	2311	KN148	16KN41c	39.9268	77.2159	massive. micritic, light gray, discontinuous CaCO3 shallow gw CaCO3 KN148	massive. micritic, light gray, discontinuous CaCO3	Calcrete (shallow groundwater carbonate)	0.89	0.04	-8.47	0.05	2016
Atushi Fm.	4.91657	2307					Bulk carbonate samples (paleomag)			-0.56	0.06	-8.07	0.09	2011
Atushi Fm.	4.9306	2302					Bulk carbonate samples (paleomag)			-0.1	0.05	-8.17	0.1	2011
Atushi Fm.	4.9783	2285					Bulk carbonate samples (paleomag)			0.14	0.06	-8.52	0.09	2011
Atushi Fm.	4.9811	2284	KN145	16KN42c	39.9265	77.2154	tabular 40 cm thick limestone bed, within laminated mudstones and silty limestones sparse ripple cross laminated shallow lacustrine env. KN145	limestone	Lacustrine (shallow lacustrine)	0.98	0.05	-7.92	0.09	2016
Atushi Fm.	5.00774	2275	ABOVE KN143	16KN43Ac	39.9264	77.2134	A: massive limey mudstone - bioturbated horizontal and vertical burrows	massive limestone, bioturbated	Lacustrine (shallow, pond)	0.14	0.05	-8.3	0.08	2016
Atushi Fm.	5.00774	2275	ABOVE KN143	16KN43Bc	39.9264	77.2134	B: laminated limey mudstone occur in an unit >60cm thick interpreted as pond, lacustrine interval within floodplain env. ~4m below fluvial channel. Above KN143.	laminated limey mudstone	Lacustrine (shallow, pond)	-0.41	0.04	-10	0.06	2016
Atushi Fm.	5.01097	2274					Bulk carbonate samples (paleomag)			-0.88	0.06	-8.21	0.05	2011
Atushi Fm.	5.02064	2271					Bulk carbonate samples (paleomag)			-1.16	0.05	-8.81	0.08	2011
Atushi Fm.	5.05287	2261					Bulk carbonate samples (paleomag)			-1.56	0.04	-7.87	0.09	2011
Atushi Fm.	5.09156	2249					Bulk carbonate samples (paleomag)			-2.33	0.06	-8.31	0.09	2011
Atushi Fm.	5.11412	2242	KN139	16KN67c	39.9261	77.2119	55 thick mudstone, gets red to the top, shows laminations of more oxidized and educed layers, sample is 40 cm below top. Above there is a 20 cm thick more silty layer. Interpreted as flood plain, very wet env.	mudstone	Palustrine (floodplain, very wet)	-0.35	0.05	-7.7	0.08	2016
Atushi Fm.	5.12379	2239					Bulk carbonate samples (paleomag)			-2.21	0.05	-8.04	0.1	2011
Atushi Fm.	5.13024	2237					Bulk carbonate samples (paleomag)			-2.3	0.03	-8.66	0.09	2011
Atushi Fm.	5.1528	2230					Bulk carbonate samples (paleomag)			-2.79	0.05	-8.44	0.07	2011
Atushi Fm.	5.17214	2224					Bulk carbonate samples (paleomag)			-2.21	0.05	-9.19	0.1	2011
Atushi Fm.	5.22372	2208	KN134-135	16KN66c	39.9256	77.2117	Laminated mudstone containing discontinuous beds of carboante that are 10-25 cm thick. Interpreted as shallow ground water carbonates, the first we found here.	carbonate bed in mudstone	Calcrete (shallow groundwater carbonate)	0.4	0.04	-7.93	0.08	2016
Atushi Fm.	5.23339	2205	KN134-135	16KN65c	39.9256	77.2117	Laminated mudstone, intercalating claystone and siltstone. Interpreted as lacustrine. The lacustrine intervals we keep seeing are 1-5 m thick. Very calcareous. SKETCH	very calcareous laminated mudstone, intercalated claystone and siltstone	Lacustrine	-0.41	0.06	-8.08	0.08	2016
Atushi Fm.	5.2398	2203	KN134-135	16KN19c	39.9256	77.2115	calcareous mudstone, massive, pink with light blue mottles, dominantly silt, some clay, sampled sround 40 cm below top. mottling suggests pedogenic modification although poorly developed. Between KN134-135.	massive calcareous mudstone	Paleosol (poorly developed)	0.29	0.07	-8.03	0.04	2016
Atushi Fm.	5.25099	2199.5					Bulk carbonate samples (paleomag)			-1.68	0.06	-9.17	0.08	2011
Atushi Fm.	5.26858	2194					Bulk carbonate samples (paleomag)			-2.01	0.06	-9.98	0.07	2011
Atushi Fm.	5.30377	2183					Bulk carbonate samples (paleomag)			-2.21	0.04	-9.81	0.1	2011
Atushi Fm.	5.37093	2162					Bulk carbonate samples (paleomag)			-1.28	0.05	-9.07	0.08	2011
Atushi Fm.	5.39012	2156					Bulk carbonate samples (paleomag)			-1.32	0.06	-6.42	0.09	2011
Atushi Fm.	5.41571	2148					Bulk carbonate samples (paleomag)			-1.72	0.04	-8.34	0.09	2011
Atushi Fm.	5.4381	2141					Bulk carbonate samples (paleomag)			-1.75	0.06	-9.04	0.1	2011
Atushi Fm.	5.45729	2135					Bulk carbonate samples (paleomag)			-2.31	0.05	-8.19	0.1	2011
Atushi Fm.	5.50526	2120	KN120-121	16KN64c	39.9246	77.2095	Sequence of lenticular conglomeratic sandstone at the bottom, then laminated claystone with flaser bedding, then laminated claystone and siltstone (sample), then laminated (3mm) claystone with thicker siltstone laminae and mudcracks at the top of the exposed layer, then massive claystone interbedded with thick siltstone, then a tabluar sandstone bed with bioturbation, then again interbedded massi…	laminated claystone and siltstone	Lacustrine	-1.54	0.06	-8.46	0.08	2016
Atushi Fm.	5.56603	2101	KN118	16KN63c	39.9244	77.2093	The top 20 cm has some laminations and layers of interbedded siltstone. Below, we sampled from a layer of 15cm thick very calcareous massive brown mudstone with spheroidal weathering, no obvious bioturbation. Below this, there is about 30 cm thick interbedded massive claystone and siltstone.	very calcareous laminated to massive brown mudstone	Lacustrine	-1.26	0.05	-7.02	0.08	2016
Atushi Fm.	5.56923	2100					Bulk carbonate samples (paleomag)			-2.11	0.05	-8.38	0.1	2011
Atushi Fm.	5.75474	2042	KN110	16KN18c	39.9236	77.2073	Mudstone with a lot of micrite 16KN18. lime mudstone, massive, light brown gray, bed is ~40cm thick; samples ~30cm below top; spheroidal weathering	Lime Mudstone	Palustrine	-2.44	0.04	-7.08	0.07	2016
Atushi Fm.	5.8251	2020					Bulk carbonate samples (paleomag)			-0.92	0.05	-8.74	0.1	2011
Atushi Fm.	5.85389	2011					Bulk carbonate samples (paleomag)			-1.11	0.05	-9.45	0.08	2011
Atushi Fm.	5.90506	1995					Bulk carbonate samples (paleomag)			-1.91	0.04	-8.43	0.08	2011
Atushi Fm.	5.93705	1985					Bulk carbonate samples (paleomag)			-2.38	0.05	-8.29	0.1	2011
Atushi Fm.	5.95304	1980					Bulk carbonate samples (paleomag)			-1.27	0.06	-8.44	0.08	2011
Atushi Fm.	6.033	1955	KN104-105	16KN62c	39.9223	77.2078	stacked sequence of clay-rich layer at the top and silt rich layer at the base, pedogenically modified. Green blue mottling, toward the top it becomes more pink with grey mottles and is more clay-rich. It has vertical and horizontal burrows. Total thickness of 63 cm, sample from 20 cm from top. At the bottom silty layer, there are crude laminations. The underlying sequence also shows bioturbation.	mudstone, clay-rich, bioturbation	Paleosol (pedogenically modified mudstone)	-0.26	0.05	-8.04	0.08	2016
Atushi Fm.	6.04588	1952					Bulk carbonate samples (paleomag)			-0.48	0.05	-9.32	0.08	2011
Atushi Fm.	6.07594	1945	KN103-104	16KN61c	39.9223	77.2065	Light brown mudstone, very calcareous, weak spheroidal weathering, no mottling, no burrows. We see laminated siltstone at the top. Thickness of mudstone (silststone) where we sampled is 60 cm, sample was 30 cm from top.	massive to laminated light brown mudstone, very calcareous	Palustrine	-0.68	0.05	-8.83	0.07	2016
Atushi Fm.	6.09312	1941					Bulk carbonate samples (paleomag)			-0.73	0.06	-8.46	0.08	2011
Atushi Fm.	6.14035	1930					Bulk carbonate samples (paleomag)			-0.85	0.04	-8.14	0.06	2011
Atushi Fm.	6.20047	1916					Bulk carbonate samples (paleomag)			-1.34	0.04	-6.74	0.09	2011
Atushi Fm.	6.22194	1911					Bulk carbonate samples (paleomag)			-1.25	0.05	-8.99	0.07	2011
Atushi Fm.	6.30422	1883					Bulk carbonate samples (paleomag)			-0.99	0.06	-7.7	0.09	2011
Atushi Fm.	6.33654	1870					Bulk carbonate samples (paleomag)			-0.57	0.04	-8.67	0.06	2011
Atushi Fm.	6.36389	1859					Bulk carbonate samples (paleomag)			-0.46	0.06	-8.08	0.1	2011
Atushi Fm.	6.39746	1845.5					Bulk carbonate samples (paleomag)			-0.97	0.04	-9.43	0.09	2011
Atushi Fm.	6.44585	1828					Bulk carbonate samples (paleomag)			-0.84	0.05	-9.1	0.07	2011
Atushi Fm.	6.55907	1805					Bulk carbonate samples (paleomag)			-0.85	0.05	-8.85	0.08	2011
Atushi Fm.	6.69198	1778					Bulk carbonate samples (paleomag)			-0.59	0.05	-8.82	0.09	2011
Atushi Fm.	6.71167	1774					Bulk carbonate samples (paleomag)			-0.25	0.05	-7.11	0.08	2011
Atushi Fm.	6.74885	1766					Bulk carbonate samples (paleomag)			-1.19	0.04	-9	0.07	2011
Atushi Fm.	6.87851	1736					Bulk carbonate samples (paleomag)			-0.39	0.05	-8.1	0.08	2011
Atushi Fm.	6.90444	1730	KN081-083	16KN60c	39.9187	77.2036	Interbedded massive silstone and claystone. Lenticular shaped sandstones at the top and base. At the base, the top portion of the sandstone shows ripples. Sample at the bottom 25 cm thick claystone.	massive claystone	Palustrine (floodplain)	-1.06	0.07	-8.3	0.08	2016
Atushi Fm.	6.94334	1721					Bulk carbonate samples (paleomag)			-0.32	0.06	-8.45	0.08	2011
Atushi Fm.	6.95631	1718					Bulk carbonate samples (paleomag)			-0.34	0.05	-7.45	0.1	2011
Atushi Fm.	7.02114	1703					Bulk carbonate samples (paleomag)			-0.37	0.06	-7.6	0.08	2011
Wuqia group, Upper Pakabulake Fm. (Eolian Mbr.)	7.05572	1695	ABOVE KN080	16KN59c	39.9199	77.194	Sequence of interbedded silt-rich laminated mudstone and massive clay-rich mudstone. Laminated siltstone is very calcareous. White laminae must be from precipitated carbonate. Abundant burrows, bioturbation cuts both facies.	calcareous massive clay-rich mudstone	Paleosol (pedogenically modified mudstone)	-0.75	0.03	-8.91	0.06	2016
Wuqia group, Upper Pakabulake Fm. (Eolian Mbr.)	7.06436	1693	KN080	16KN58c	39.9199	77.1942	Light brown clay- to siltstone with bioturbation. Very calcareous, massive, spheroidal weathering. Interpreted as palustrine. 18 cm thick, sample at the base.	very calcareous, massive clay to siltstone	Palustrine	-0.95	0.06	-8.39	0.09	2016
Wuqia group, Upper Pakabulake Fm. (Eolian Mbr.)	7.07733	1690					Bulk carbonate samples (paleomag)			-0.23	0.04	-7.59	0.08	2011
Wuqia group, Upper Pakabulake Fm. (Eolian Mbr.)	7.11623	1681	KN078	16KN57c	39.9189	77.1921	102 cm thick mudstone, more silty than previous sample (16KN56c). Red brown moderately calcareous throughout, has some brown mottling. Interpreted as palustrine. Sample taken 72 cm from top.	red-brown moderately calcareous mudstone, some mottling	Palustrine	-1.74	0.07	-9.11	0.08	2016
Wuqia group, Upper Pakabulake Fm. (Eolian Mbr.)	7.1548	1673	KN077	16KN17c	39.917	77.2209	Massive calcareous, blocky weathering, ~45 cm thick' silty in base, fines upward to clay-silt in top. Calcareous throughout bottom to top; upper 20 cm show blue and gray mottling. Blue reduction zones occur around 2 mm root traces. Samples collected 35 cm below top. Interpreted as paleosol. 16KN17c	massive calcareous mudstone	Paleosol	-1.94	0.05	-9.97	0.06	2016
Wuqia group, Upper Pakabulake Fm. (Eolian Mbr.)	7.22585	1661					Bulk carbonate samples (paleomag)			-0.71	0.06	-8.02	0.08	2011
Wuqia group, Upper Pakabulake Fm. (Eolian Mbr.)	7.40346	1631					Bulk carbonate samples (paleomag)			-0.88	0.05	-9.07	0.08	2011
Wuqia group, Upper Pakabulake Fm. (Eolian Mbr.)	7.43898	1625					Bulk carbonate samples (paleomag)			-0.32	0.05	-9.18	0.08	2011
Wuqia group, Upper Pakabulake Fm. (Eolian Mbr.)	7.47451	1619					Bulk carbonate samples (paleomag)			-0.56	0.05	-7.97	0.05	2011
Wuqia group, Upper Pakabulake Fm. (Eolian Mbr.)	7.55739	1605	KN071-072	16KN16c	39.9159	77.2221	Massive calcareous brown mudstone at top of thin (<1m thick) layers of interbedded silt and claystone. Interpreted as interdune deposits. Each layer 15-40 cm. 16KN16c		Palustrine (massive mudstone, interdune pond)	-0.18	0.03	-8.93	0.08	2016
Wuqia group, Upper Pakabulake Fm. (Eolian Mbr.)	7.64028	1591					Bulk carbonate samples (paleomag)			-0.92	0.04	-9.36	0.09	2011
Wuqia group, Upper Pakabulake Fm. (Eolian Mbr.)	7.6758	1585					Bulk carbonate samples (paleomag)			-0.61	0.03	-9.8	0.06	2011
Wuqia group, Upper Pakabulake Fm. (Eolian Mbr.)	7.74093	1574					Bulk carbonate samples (paleomag)			-1.2	0.06	-9	0.08	2011
Wuqia group, Upper Pakabulake Fm. (Eolian Mbr.)	7.82382	1560					Bulk carbonate samples (paleomag)			-0.89	0.06	-8.92	0.08	2011
Wuqia group, Upper Pakabulake Fm. (Eolian Mbr.)	7.88302	1550	KN069-070	16KN15c	39.9148	77.2224	Laminated red-brown to tan clay/siltstone laminated tan in color is much more calcareous, suggesting primary micritic deposits in shallow pond environment. Thin laminae of (tan) more calcareous laminae inter laminated with (red brown) clay laminae It is too well laminated, this must be a pond with shallow water 16KN15c	Laminated mudstone	Palustrine (shallow pond environment, interdune)	-1.12	0.04	-10	0.08	2016
Wuqia group, Upper Pakabulake Fm. (Eolian Mbr.)	7.90374	1546.5					Bulk carbonate samples (paleomag)			-1.17	0.05	-8.36	0.06	2011
Wuqia group, Upper Pakabulake Fm. (Eolian Mbr.)	7.95999	1537					Bulk carbonate samples (paleomag)			-0.9	0.06	-8.18	0.1	2011
Wuqia group, Upper Pakabulake Fm. (Eolian Mbr.)	8.11754	1510					Bulk carbonate samples (paleomag)			-1.35	0.06	-9.15	0.09	2011
Wuqia group, Upper Pakabulake Fm. (Eolian Mbr.)	8.17478	1498					Bulk carbonate samples (paleomag)			-0.87	0.04	-9.15	0.06	2011
Wuqia group, Upper Pakabulake Fm. (Eolian Mbr.)	8.21771	1489	KN064-065	16KN14c	39.9141	77.223	very calcareous spheroidal weathering massive mudstone 40 cm thick, several <1 cm silt laminae. Interpreted as interdune pond deposits/overbank deposits. Just above, 1.5 m thick fluvial channel deposit that pinches out over ~20m. Above and below sandstone we have massive claystone interbedded with massive siltstone interpreted as pond env, shallow water in wetland (Palustrine) Red color suggests …	very calcareous mudstone	Palustrine (interdune pond deposits/overbank deposits)	-1.19	0.05	-8.78	0.07	2016
Wuqia group, Upper Pakabulake Fm. (Eolian Mbr.)	8.22247	1488					Bulk carbonate samples (paleomag)			-1.71	0.03	-9.71	0.07	2011
Wuqia group, Upper Pakabulake Fm. (Eolian Mbr.)	8.23201	1486					Bulk carbonate samples (paleomag)			-0.54	0.06	-8.23	0.1	2011
Wuqia group, Upper Pakabulake Fm. (Eolian Mbr.)	8.32741	1466					Bulk carbonate samples (paleomag)			-0.77	0.04	-8.71	0.07	2011
Wuqia group, Upper Pakabulake Fm. (Eolian Mbr.)	8.35603	1460	KN062-063	16KN13c	39.9134	77.2222	Green-yellow laminated limey mudstone or muddy limestone; interpreted as shallow lacustrine, organic rich environment in interdune area.	Interbeded Fl Fm Fm=Massive mudstone, bioturbated; Laminated Fl shallow water lake Clay sized layers are bioturbated The silt layers (green, yellow) are practically a limestone (16KN13c)	Lacustrine (shallow lacustrine) (Interdune lake)	-1.76	0.03	-9.21	0.08	2016
Wuqia group, Upper Pakabulake Fm. (Eolian Mbr.)	8.39896	1451					Bulk carbonate samples (paleomag)			-1.45	0.06	-8.66	0.1	2011
Wuqia group, Upper Pakabulake Fm. (Eolian Mbr.)	8.43235	1444	KN060	16KN12c	39.9133	77.2219	Massive very calcareous, red-brown mudstone 10 cm below top of interdune' ~1.5 m thick interdune shallow water pond environment, mudstone react like limestone. Mudstone is massive mottled Spheroidal weathering feature Very calcareous practically a limestone 16KN12c Interdune shallow water to pond env Probably this is KN060	Massive very calcareous, red-brown mudstone	Palustrine (shallow water pond environment)	-0.39	0.06	-8.55	0.06	2016
Wuqia group, Upper Pakabulake Fm. (Eolian Mbr.)	8.59452	1410	KN058-059	16KN11c	39.9127	77.2224	Massive, very calcareous red-brown mudstone top of interdune deposits	Very calcareous mudstone	Palustrine (massive mudstone, interdune pond)	-1.09	0.06	-9.97	0.06	2016
Wuqia group, Upper Pakabulake Fm. (Eolian Mbr.)	8.71376	1385					Bulk carbonate samples (paleomag)			-2.06	0.02	-8.65	0.1	2011
Wuqia group, Upper Pakabulake Fm. (Eolian Mbr.)	8.76146	1375					Bulk carbonate samples (paleomag)			-1.83	0.05	-8.45	0.08	2011
Wuqia group, Upper Pakabulake Fm. (Eolian Mbr.)	8.771	1373	16KN54-55	16KN10c	39.9122	77.2212	massive, very calcareous red-brown mudstone. Interpreted top of interdune deposits	massive, very calcareous red-brown mudstone	Palustrine (top of interdune deposits)	-1.45	0.06	-8.79	0.07	2016
Wuqia group, Upper Pakabulake Fm. (Eolian Mbr.)	8.7893	1367					Bulk carbonate samples (paleomag)			-1.15	0.04	-8.22	0.08	2011
Wuqia group, Upper Pakabulake Fm. (Eolian Mbr.)	8.89606	1332					Bulk carbonate samples (paleomag)			-1.62	0.04	-8.5	0.09	2011
Wuqia group, Upper Pakabulake Fm. (Eolian Mbr.)	8.94791	1315					Bulk carbonate samples (paleomag)			-1.24	0.06	-9.2	0.1	2011
Wuqia group, Upper Pakabulake Fm. (Eolian Mbr.)	8.96011	1311					Bulk carbonate samples (paleomag)			-1.52	0.04	-9.52	0.08	2011
Wuqia group, Upper Pakabulake Fm. (Eolian Mbr.)	8.96316	1310	ABOVE KN050	16KN09c	39.9108	77.2206	massive very calcareous medium red-brown mudstone. Laminae of silt spaced at 1 cm to 5 cm intervals Massive mudstone 16KN09c spheroidal weathering Laminated where siltstone is present Very calcareous	massive very calcareous medium red-brown mudstone	Palustrine (Interdune massive very calcareous mudstone)	-1.4	0.04	-8.79	0.07	2016
Wuqia group, Upper Pakabulake Fm. (Eolian Mbr.)	9.07297	1274	KN045	16KN08c	39.9104	77.2198	Laminated calcareous light brown clay/siltstone spheroidal weathering. Near KN045 Interpreted interdune	Laminated calcareous light brown clay/siltstone	Palustrine (interdune, calcareous clay/siltstone)	-1.25	0.07	-7.56	0.08	2016
Wuqia group, Upper Pakabulake Fm. (Eolian Mbr.)	9.07297	1274					Bulk carbonate samples (paleomag)			-0.67	0.06	-8.88	0.08	2011
Wuqia group, Upper Pakabulake Fm. (Eolian Mbr.)	9.09127	1268					Bulk carbonate samples (paleomag)			-1.01	0.03	-9.25	0.1	2011
Wuqia group, Upper Pakabulake Fm. (Eolian Mbr.)	9.15747	1250	KN043-044	16KN07c	39.9099	77.2195	laminated claystone, carbonate, gypsum at top of interdune deposits. Very calcareous. Interpreted interdune pond environment	laminated claystone	Palustrine (interdune pond environment)	-2.01	0.04	-8.78	0.05	2016
Wuqia group, Upper Pakabulake Fm. (Eolian Mbr.)	9.21577	1235					Bulk carbonate samples (paleomag)			-1.14	0.04	-7.53	0.08	2011
Wuqia group, Upper Pakabulake Fm. (Eolian Mbr.)	9.23521	1230					Bulk carbonate samples (paleomag)			-0.48	0.05	-7.31	0.1	2011
Wuqia group, Upper Pakabulake Fm. (Eolian Mbr.)	9.25853	1224					Bulk carbonate samples (paleomag)			-1.13	0.03	-9.23	0.1	2011
Wuqia group, Upper Pakabulake Fm. (Eolian Mbr.)	9.27408	1220					Bulk carbonate samples (paleomag)			-0.9	0.05	-8.99	0.1	2011
Wuqia group, Upper Pakabulake Fm. (Eolian Mbr.)	9.28962	1216					Bulk carbonate samples (paleomag)			-0.68	0.06	-9.16	0.09	2011
Wuqia group, Upper Pakabulake Fm. (Eolian Mbr.)	9.2974	1214					Bulk carbonate samples (paleomag)			-0.58	0.06	-6.7	0.08	2011
Wuqia group, Upper Pakabulake Fm. (Eolian Mbr.)	9.37182	1183					Bulk carbonate samples (paleomag)			-0.61	0.05	-8.34	0.08	2011
Wuqia group, Upper Pakabulake Fm. (Eolian Mbr.)	9.38288	1178	KN036-037	16KN06c	39.9086	77.2193	Massive very calcareous tan siltstone above laminated red/brown to tan silt/claystone. Interdune pond environment.	Mudstone, very calcareous	Palustrine (interdune pond environment)	-0.52	0.06	-9.07	0.07	2016
Wuqia group, Upper Pakabulake Fm. (Eolian Mbr.)	9.40167	1169.5					Bulk carbonate samples (paleomag)			-0.9	0.06	-9.2	0.09	2011
Wuqia group, Upper Pakabulake Fm. (Eolian Mbr.)	9.40499	1168					Bulk carbonate samples (paleomag)			-0.8	0.04	-9.01	0.07	2011
Wuqia group, Upper Pakabulake Fm. (Eolian Mbr.)	9.4072	1167					Bulk carbonate samples (paleomag)			-1.11	0.04	-9.22	0.09	2011
Wuqia group, Upper Pakabulake Fm. (Eolian Mbr.)	9.4615	1143					Bulk carbonate samples (paleomag)			-0.87	0.05	-8.55	0.1	2011
Wuqia group, Upper Pakabulake Fm. (Eolian Mbr.)	9.47295	1138					Bulk carbonate samples (paleomag)			-1.66	0.05	-9.5	0.07	2011
Wuqia group, Upper Pakabulake Fm. (Eolian Mbr.)	9.49127	1130					Bulk carbonate samples (paleomag)			-0.68	0.06	-10.73	0.04	2011
Wuqia group, Upper Pakabulake Fm. (Eolian Mbr.)	9.50043	1126					Bulk carbonate samples (paleomag)			-0.7	0.06	-8.9	0.1	2011
Wuqia group, Upper Pakabulake Fm. (Eolian Mbr.)	9.51646	1119					Bulk carbonate samples (paleomag)			-1.56	0.04	-9.51	0.1	2011
Wuqia group, Upper Pakabulake Fm. (Eolian Mbr.)	9.52562	1115	BELOW KN029	16KN05c	39.9073	77.2193	Calcareous, massive, red-brown, clay-rich mudstone with laminae of ~1-2 m silt; within interdune deposits Clay silt dominated deposits are interpreted as shallow lakes/ponds with micrite and clay deposited from suspension laminae of silt represent scours - sediment washed into the system Mudstone very calcareous massive (Fm) 16KN05c Sandstone (Sh) is even more calcareous than mudstone, should be …	Mudstone very calcareous massive	Palustrine (pond)	-0.39	0.06	-7.57	0.09	2016
Wuqia group, Upper Pakabulake Fm. (Eolian Mbr.)	9.52562	1115					Bulk carbonate samples (paleomag)			-1.88	0.04	-10.35	0.1	2011
Wuqia group, Upper Pakabulake Fm. (Eolian Mbr.)	9.53478	1111					Bulk carbonate samples (paleomag)			-1.95	0.04	-8.79	0.09	2011
Wuqia group, Upper Pakabulake Fm. (Eolian Mbr.)	9.54623	1106					Bulk carbonate samples (paleomag)			-1.59	0.02	-9.09	0.08	2011
Wuqia group, Upper Pakabulake Fm. (Eolian Mbr.)	9.5783	1092					Bulk carbonate samples (paleomag)			-1.2	0.06	-9.16	0.08	2011
Wuqia group, Upper Pakabulake Fm. (Eolian Mbr.)	9.59433	1085					Bulk carbonate samples (paleomag)			-1.67	0.06	-9.07	0.1	2011
Wuqia group, Upper Pakabulake Fm. (Eolian Mbr.)	9.61494	1076					Bulk carbonate samples (paleomag)			-1.72	0.06	-10.09	0.09	2011
Wuqia group, Upper Pakabulake Fm. (Eolian Mbr.)	9.62753	1070.5					Bulk carbonate samples (paleomag)			-1.13	0.06	-10.89	0.07	2011
Wuqia group, Upper Pakabulake Fm. (Eolian Mbr.)	9.63211	1068.5					Bulk carbonate samples (paleomag)			-0.23	0.05	-8.02	0.1	2011
Wuqia group, Upper Pakabulake Fm. (Eolian Mbr.)	9.66138	1059					Bulk carbonate samples (paleomag)			-1.2	0.05	-9.51	0.07	2011
Wuqia group, Upper Pakabulake Fm. (Eolian Mbr.)	9.68055	1055					Bulk carbonate samples (paleomag)			-0.96	0.05	-8.1	0.1	2011
Wuqia group, Upper Pakabulake Fm. (Eolian Mbr.)	9.70452	1050	KN024	16KN04c	39.9057	77.2187	Massive light red-brown, very calcareous mudstone, spheroidal weathering. Mudstone are deposited in shallow relief in underlying s.s. Sandstone cutting mudstone Seems like channel Mudstone pinches out Mudstone very calcareous Sandstone very calcareous 16KN04c: calcareous mudstone, the layer pinches out	very calcareous mudstone	Palustrine (Interdune pond, floodplain)	-0.91	0.06	-9.35	0.07	2016
Wuqia group, Upper Pakabulake Fm. (Eolian Mbr.)	9.7189	1047					Bulk carbonate samples (paleomag)			-1.1	0.06	-8.72	0.1	2011
Wuqia group, Upper Pakabulake Fm. (Eolian Mbr.)	9.73328	1044					Bulk carbonate samples (paleomag)			-1.81	0.05	-8.43	0.09	2011
Wuqia group, Upper Pakabulake Fm. (Eolian Mbr.)	9.84353	1021					Bulk carbonate samples (paleomag)			-1.24	0.05	-8.93	0.1	2011
Wuqia group, Upper Pakabulake Fm. (Eolian Mbr.)	9.88188	1013	KN017	16KN03c	39.9047	77.217	Massive calcareous, red-brown mudstone; spheroidal weathering. Flaser bedding and horizontal and vertical burrows within mudstone. (drape?) units suggest presence of shallow water interdune ponds. Almost a Paleosol, it looks like it have been slightly modified by bioturbation	massive calcareous red brown mudstone	Palustrine (Interdune pond)	-0.96	0.05	-7.22	0.08	2016
Wuqia group, Upper Pakabulake Fm. (Eolian Mbr.)	9.88667	1012					Bulk carbonate samples (paleomag)			-2.32	0.06	-9.7	0.09	2011
Wuqia group, Upper Pakabulake Fm. (Eolian Mbr.)	9.88667	1012	KN527	KN527			Bulk carbonate samples (paleomag). Beige mudstone, laminated	laminated mudstone		-1.27	0.05	-7.73	0.06	2011
Wuqia group, Upper Pakabulake Fm. (Eolian Mbr.)	9.92022	1005	KN526	KN526			Bulk carbonate samples (paleomag). Beige siltstone to fine grained sandtone, massive. Has visible carbonate cement. At places they form CacO3-rich lenses	massive siltstone to fine grained sandstone		-1.01	0.05	-8.18	0.09	2011
Wuqia group, Upper Pakabulake Fm. (Eolian Mbr.)	9.98533	991.5	KN525	KN525			Bulk carbonate samples (paleomag). Beige laminated mudstone	laminated mudstone		-0.85	0.06	-8.83	0.08	2011
Wuqia group, Upper Pakabulake Fm. (Eolian Mbr.)	10.0092	987	KN524	KN524			Bulk carbonate samples (paleomag). Beige massive mudstone	massive mudstone		-1.04	0.06	-9.15	0.09	2011
Wuqia group, Upper Pakabulake Fm. (Eolian Mbr.)	10.0304	983	KN012	16KN02c	39.9038	77.2159	Laminated mudstone moderately calcareous much more calcareous than s.s. above (16KN01c). Alternated dark red-brown and tan laminations are clay- and silt-rich respectively. Dark red brown laminae is more clay rich and the more light brown is silt rich	Laminated mudstone, moderately calcareous	Palustrine (Interdune pond)	-1.1	0.04	-8.38	0.08	2016
Wuqia group, Upper Pakabulake Fm. (Eolian Mbr.)	10.0569	978	KN523	KN523			Bulk carbonate samples (paleomag). Dark beige massive siltstone to fine-grained sandstone. Part of sample shows laminations	siltstone to fine-grained sandstone		-1.42	0.04	-8.9	0.05
Wuqia group, Upper Pakabulake Fm. (Eolian Mbr.)	10.1205	966	KN008	16KN01c	39.903	77.2115	Up section fining of laminated s.s. to very fine sand interbeds of silt to very fine sand and laminated clay to silt. Sample 16KN01c (calcareous mudstone) Interbeded mudstones are much more calcareous than sandstones Two dif colors olive 5y6/1 and moderate reddish brown 10r4/6	massive mudstone	Palustrine (Interdune pond)	-0.8	0.06	-7.27	0.06	2016
Wuqia group, Upper Pakabulake Fm. (Eolian Mbr.)	10.1258	965	KN521	KN521			Bulk carbonate samples (paleomag). Beige massive mudstone	massive mudstone		-1.43	0.06	-9.29	0.06	2011
Wuqia group, Upper Pakabulake Fm. (Eolian Mbr.)	10.1576	959	KN520	KN520			Bulk carbonate samples (paleomag). Beige siltstone, massive, looks laminated at places	massive siltstone		-1.51	0.05	-9.52	0.06	2011
Wuqia group, Upper Pakabulake Fm. (Eolian Mbr.)	10.1947	952	KN519	KN519			Bulk carbonate samples (paleomag). Beige siltstone, massive	massive siltstone		-1.29	0.04	-9.16	0.04	2011
Wuqia group, Upper Pakabulake Fm. (Eolian Mbr.)	10.2318	945	KN518	KN518			Bulk carbonate samples (paleomag). Beige siltstone, massive	massive siltstone		-1.93	0.06	-9	0.09	2011
Wuqia group, Upper Pakabulake Fm. (Eolian Mbr.)	10.2583	940	KN517	KN517			Bulk carbonate samples (paleomag). Beige massive siltstone to fine grained sandstone. Visible carbonate cement	massive siltstone fine grained sandstone		-2.35	0.06	-9.59	0.09	2011
Wuqia group, Upper Pakabulake Fm. (Eolian Mbr.)	10.3113	930	KN516	KN516			Bulk carbonate samples (paleomag). Beige fine-grained sandstone, massive	massive fine-grained sandstone		-1.8	0.06	-8.94	0.06	2011
Wuqia group, Upper Pakabulake Fm. (Eolian Mbr.)	10.3458	923.5	KN515	KN515			Bulk carbonate samples (paleomag). Laminated mudstone, prob lacustrine/pond	laminated mudstone		-2.36	0.05	-9.29	0.07	2011
Wuqia group, Upper Pakabulake Fm. (Eolian Mbr.)	10.4385	906	KN513	KN513			Bulk carbonate samples (paleomag). Beige mudstone, laminated	laminated mudstone		-2.68	0.04	-9.19	0.07	2011
Wuqia group, Upper Pakabulake Fm. (Eolian Mbr.)	10.4703	900	KN512-513	16KN56c	39.9026	77.2265	Calcareous claystone, red-brown, massive. In places it is laminated. Mostly has spheroidal weathering, indicating high evaporation and high carbonate accumulation. 56-thick. Sample 16KN56c was sampled 33 cm from top. Interpreted plaustrine environment, which is a sub-environment in flood plain.	red-brown massive calcareous claystone	Palustrine	-0.66	0.03	-9	0.08	2016
Wuqia group, Upper Pakabulake Fm. (Eolian Mbr.)	10.5816	879	KN511	KN511			Bulk carbonate samples (paleomag). Beige brown fine grained sandstone. One layer is mudstone, bioturbation is visible where tubes that have the same red color as mudstone penetrate the sandstone that I suppose was below.	massive fine grained sandstone		-1.2	0.03	-8.79	0.06	2011
Wuqia group, Upper Pakabulake Fm. (Eolian Mbr.)	10.6187	872	KN510	KN510			Bulk carbonate samples (paleomag). Beige siltstone, CaCO3-rich lenses, some lamination. Hard to say if it was laminated due to existence of clear lenses that look like carbonate cement	massive siltstone, CaCO3-rich lenses		-1.4	0.05	-8.32	0.05	2011
Wuqia group, Upper Pakabulake Fm. (Eolian Mbr.)	10.677	861	KN509	KN509			Bulk carbonate samples (paleomag). Beige siltstone, CaCO3-rich lenses, some lamination. Hard to say if it was laminated due to existence of clear lenses that look like carbonate cement, (same as above)	massive siltstone, CaCO3-rich lenses		-2.9	0.06	-9.21	0.08	2011
Wuqia group, Upper Pakabulake Fm. (Eolian Mbr.)	10.7459	848	KN508	KN508			Bulk carbonate samples (paleomag). Beige-brown claystone, massive, crudely laminated	laminated claystone		-1.22	0.06	-8.73	0.05	2011
Wuqia group, Upper Pakabulake Fm. (Eolian Mbr.)	10.7618	845	KN507	KN507			Bulk carbonate samples (paleomag). Beige massive siltstone	massive siltstone		-2.85	0.06	-9.74	0.1	2011
Wuqia group, Upper Pakabulake Fm. (Eolian Mbr.)	10.8148	835	KN506	KN506			Bulk carbonate samples (paleomag). Beige massive siltstone to fine-grained sandstone. Top of the sample apparently has ripples	massive siltstone to fine grained sandstone		-2.27	0.05	-9.89	0.07	2011
Wuqia group, Upper Pakabulake Fm. (Eolian Mbr.)	10.8625	826	KN505	KN505			Bulk carbonate samples (paleomag). Beige-brown claystone, laminated (reddish, white, brownish layers)	laminated claystone		-2.01	0.06	-9.29	0.1	2011
Wuqia group, Upper Pakabulake Fm. (Eolian Mbr.)	10.9738	805	KN503	KN503			Bulk carbonate samples (paleomag). Beige reddish siltstone to fine-grained sandstone	massive siltstone, CaCO3-rich lenses (carbonate cement);		-1.9	0.06	-9.27	0.1	2011
Wuqia group, Upper Pakabulake Fm. (Eolian Mbr.)	11.0374	793	KN502	KN502			Bulk carbonate samples (paleomag). Beige siltstone to medium-grained sandstone, massive	massive siltstoneto fine-grained sandstone		-1.28	0.05	-8.2	0.04	2011
Wuqia group, Upper Pakabulake Fm. (Eolian Mbr.)	11.1029	781	KN501	KN501			Bulk carbonate samples (paleomag). Brown-reddish massive claystone	massive claystone		-1.22	0.05	-8.5	0.07	2011
Wuqia group, Upper Pakabulake Fm. (Eolian Mbr.)	11.1415	774	KN500	KN500			Bulk carbonate samples (paleomag). Brown-reddish claystone, massive	massive claystone		-2	0.05	-9.37	0.08	2011
Wuqia group, Upper Pakabulake Fm. (Eolian Mbr.)	11.2684	751	KN499	KN499			Bulk carbonate samples (paleomag). Beige-reddish fine to medium grained sandstone, massive, some thin lamina	massive sandtsone, crudely laminated		-1.26	0.06	-8.42	0.07	2011
Wuqia group, Upper Pakabulake Fm. (Eolian Mbr.)	11.296	746	KN498	KN498			Bulk carbonate samples (paleomag). Beige-red claystone, thin laminations	laminated claystone		-1.39	0.05	-7.68	0.09	2011
Wuqia group, Upper Pakabulake Fm. (Eolian Mbr.)	11.3291	740	KN497	KN497			Bulk carbonate samples (paleomag). Brown-red siltstone, thin laminations	laminated siltstone		-1.57	0.04	-8.36	0.09	2011
Wuqia group, Upper Pakabulake Fm. (Eolian Mbr.)	11.376	731.5	KN496	KN496			Bulk carbonate samples (paleomag). Beige siltstone to fine-grained sandstone. Massive with crude thin laminations, visible carbonate cement	massive siltstone fine grained sandstone, crude laminations		-1.66	0.06	-9.2	0.03	2011
Wuqia group, Upper Pakabulake Fm. (Eolian Mbr.)	11.4284	722	KN495	KN495			Bulk carbonate samples (paleomag). Beige red siltstone to medium-grained sandstone. Massive with crude thin laminations, visible carbonate cement	massive siltstone to medium-grained sandstone		-0.9	0.05	-9.94	0.09	2011
Wuqia group, Upper Pakabulake Fm. (Eolian Mbr.)	11.5166	706	KN494	KN494			Bulk carbonate samples (paleomag). Beige claystone, massive with crude laminations	massive claystone		-1.02	0.06	-8.09	0.06	2011
Wuqia group, Upper Pakabulake Fm. (Eolian Mbr.)	11.5332	703	KN493-494	16KN52c	39.8974	72.2314	Interdune mudstone. Mudstone, massive to crudely laminated, brown, spheroidal weathering. Blue mottles, burrows (oblique to bedding), abundant gypsum, 1 cm thick gypsum bed is 3cm below top.	massive mudstone (crudely laminated)	Paleosol (interdune - pedogenic modification - mudstone)	-0.62	0.05	-8.11	0.05	2016
Wuqia group, Upper Pakabulake Fm. (Eolian Mbr.)	11.5497	700	KN493	KN493			Bulk carbonate samples (paleomag). Beige-reddish claystone, massive	massive claystone		-0.93	0.06	-7.84	0.1	2011
Wuqia group, Upper Pakabulake Fm. (Eolian Mbr.)	11.6104	689	KN492	KN492			Bulk carbonate samples (paleomag). Brown-beige siltstone to fine-grained sandstone, massive with visible carbonate cement	massive siltstone to fine-grained sandstone		-1.17	0.05	-8.43	0.06	2011
Wuqia group, Upper Pakabulake Fm. (Eolian Mbr.)	11.6546	681	KN491	KN491			Bulk carbonate samples (paleomag). Brown-beige claystone, laminated with visible with crystalline material (not sure if gypsum or calcite). Locally has carbonate with coarser grained sugarly texture	laminated claystone		-0.79	0.03	-7.22	0.09	2011
Wuqia group, Upper Pakabulake Fm. (Eolian Mbr.)	11.7042	672	KN490	KN490			Bulk carbonate samples (paleomag). Brown-beige claystone, massive	massive claystone		-1.26	0.04	-6.79	0.1	2011
Wuqia group, Upper Pakabulake Fm. (Eolian Mbr.)	11.7704	660	KN489	KN489			Bulk carbonate samples (paleomag). Light beige siltstone to fine-grained sandstone, massive, visible carbonate cement	massive siltstone to fine-grained sandstone		-2.5	0.05	-9.11	0.09	2011
Wuqia group, Upper Pakabulake Fm. (Eolian Mbr.)	11.809	653	KN488	KN488			Bulk carbonate samples (paleomag). Beige-reddish claystone, laminated	laminated claystone		-1.39	0.06	-7.11	0.07	2011
Wuqia group, Upper Pakabulake Fm. (Eolian Mbr.)	11.8642	643	KN487	KN487			Bulk carbonate samples (paleomag). Beige-reddish claystone, massive, with visible coarser grained carbonate with sugarly texture, white mottling	massive claystone		-1.24	0.06	-7.04	0.05	2011
Wuqia group, Upper Pakabulake Fm. (Eolian Mbr.)	11.9635	625	KN486	KN486			Bulk carbonate samples (paleomag). Beige claystone, massive, has white glue	massive claystone		-1.68	0.06	-7.54	0.08	2011
Wuqia group, Upper Pakabulake Fm. (Eolian Mbr.)	11.9966	619	KN485	16KN51c	39.8946	77.2326	Eolian cross bed sets with interdune layer of mudstone. Cross beds: 22/340; 26/330; 34/352; 34/353 Bedding: 50/350 We sampled interdine layer of mudstone: massive light brown spheroidal weathering, some blue mottling (minor). Redder and more mottled at the base, minor pedogenesis (16KN51c).	massive light brown mudstone	Paleosol (interdune -weak pedogenic modification - mudstone)	-1.16	0.06	-7.97	0.08	2016
Wuqia group, Upper Pakabulake Fm. (Eolian Mbr.)	12.2862	535	KN479	KN479			Bulk carbonate samples (paleomag). Beige red , fine to medium grained sandstone, massive	massive fine to medium grained sandstone		-1.19	0.06	-8.4	0.08	2011
Wuqia group, Upper Pakabulake Fm. (Eolian Mbr.)	12.3429	527	KN478	KN478			Bulk carbonate samples (paleomag). Red beige claystone, laminated	laminated claystone		-1.29	0.05	-7.54	0.05	2011
Wuqia group, Lower Pakabulake Fm.	12.4386	513.5	KN477	KN477			Bulk carbonate samples (paleomag). Brown red siltstone, laminated, white glue	laminated siltstone		-1.2	0.06	-7.49	0.1	2011
Wuqia group, Lower Pakabulake Fm.	12.4902	503.5	KN476	KN476			Bulk carbonate samples (paleomag). Light beige siltstone to medium grained sandstone	massive to laminated		-2.51	0.06	-8.9	0.1	2011
Wuqia group, Lower Pakabulake Fm.	12.5145	496	KN475	KN475			Bulk carbonate samples (paleomag). Beige siltstone to fine-grained sandstone. Massive to laminated	massive to laminated siltstone to fine-grained sandstone		-1.82	0.06	-8.77	0.05	2011
Wuqia group, Lower Pakabulake Fm.	12.5405	488	KN474	KN474			Bulk carbonate samples (paleomag). Beige siltstone, laminated	laminated siltstone		-1.5	0.06	-8.07	0.07	2011
Wuqia group, Lower Pakabulake Fm.	12.5632	481	KN473	KN473			Bulk carbonate samples (paleomag). Beige siltstone to fine-grained sandstone. Massive with crude thin laminations, visible carbonate cement	massive, some laminations		-1.06	0.04	-8.24	0.09	2011
Wuqia group, Lower Pakabulake Fm.	12.5923	472	KN472	KN472			Bulk carbonate samples (paleomag). Beige mudstone, cross laminated	cross laminated mudstone		-0.91	0.06	-8.22	0.07	2011
Wuqia group, Lower Pakabulake Fm.	12.6345	459	KN471	KN471			Bulk carbonate samples (paleomag). Light gray siltstone, massive	massive siltstone		-1.26	0.06	-8.45	0.05	2011
Wuqia group, Lower Pakabulake Fm.	12.6669	449	KN470	16KN50c	39.8919	77.2383	Top part: very fine to fine lenticular sandstone. Middle part: massive red brown clay-rich mudstone, weak laminations. Sample taken from here (16KN50c). Clay-rich layer is very calcareous, has blue grey mottles, and is 25 cm thick. Bottom part: brown bed with ripple x laminations (15cm thick) underlying the sample site.	massive red brown clay rich mudstone	Lacustrine	-1.35	0.04	-7.32	0.08	2016
Wuqia group, Lower Pakabulake Fm.	12.6685	448.5	KN470	KN470			Bulk carbonate samples (paleomag). Beige claystone, laminated	laminated claystone		-0.96	0.06	-7.12	0.06	2011
Wuqia group, Lower Pakabulake Fm.	12.722	432	KN468	KN468			Bulk carbonate samples (paleomag). Beige mudstone, massive to laminated	massive to laminated mudstone		-1.11	0.05	-7.43	0.07	2011
Wuqia group, Lower Pakabulake Fm.	12.7995	421	KN467	KN467			Bulk carbonate samples (paleomag). Light beige mudstone, laminated	Laminated mudstone		-1.55	0.06	-8.18	0.04	2011
Wuqia group, Lower Pakabulake Fm.	12.8971	410	KN466	KN466			Bulk carbonate samples (paleomag). Light beige mudstone, laminated	massive		-1.55	0.05	-8.25	0.06	2011
Wuqia group, Lower Pakabulake Fm.	12.9308	405	KN465	KN465			Bulk carbonate samples (paleomag). Beige, slightly red reddish purple mudstone, massive, has carbonate mottling	massive mudstone		-0.96	0.06	-7.82	0.09	2011
Wuqia group, Lower Pakabulake Fm.	12.9646	400	KN464	KN464			Bulk carbonate samples (paleomag). Beige mudstone, has red spots (oxidation)	massive mudstone		-1.12	0.06	-7.6	0.07	2011
Wuqia group, Lower Pakabulake Fm.	12.9848	397	KN463-464	16KN49c	39.8905	77.2413	Overall the sequence is composed of interbedded mudtsone and sandtone, both tabular, but some are lenticular. The bottom part contains a muddy layer taht is red brown, has spheroidal weathering, massive, very calcareous, the sample is from the bottom 15cm. The mudstone is calcareous throughout so possibly cemented. 16KN49c	massive, very calcareous mudstone	Lacustrine	-1.55	0.04	-7.48	0.06	2016
Wuqia group, Lower Pakabulake Fm.	13.0017	394.5	KN463	KN463			Bulk carbonate samples (paleomag). Beige mudstone, laminated	laminated mudstone		-1.16	0.04	-8.37	0.1	2011
Wuqia group, Lower Pakabulake Fm.	13.0422	385.5	KN462	KN462			Bulk carbonate samples (paleomag). Beige and white mudstone, massive	massive mudstone		-1.08	0.06	-7.24	0.07	2011
Wuqia group, Lower Pakabulake Fm.	13.0763	370.5	KN461	KN461			Bulk carbonate samples (paleomag). Beige siltstone to fine grained sandstone, massive, veins of gyspum, has sugarly texture	massive siltstone to fine grained sandstone		-1.56	0.07	-7.44	0.06	2011
Wuqia group, Lower Pakabulake Fm.	13.1069	357	KN460A	KN460A			Bulk carbonate samples (paleomag). Beige red claystone, massive with mottling, look like a paleosol	massive claystone		-2.47	0.06	-6.91	0.09	2011
Wuqia group, Lower Pakabulake Fm.	13.2167	320.5	KN458	KN458			Bulk carbonate samples (paleomag). Beige mudstone, massive, carbonate with sugarly texture	massive mudstone		-1.54	0.06	-7.65	0.05	2011
Wuqia Group, Unit C	13.3011	313	KN456-457	16KN48c	39.8886	77.2425	Sequence of muddy green limestone that has a sugarly texture. Sample 16KN48c Is from the bottom. The sequence is coarsening upward. 8-10 m above our sampling we start seeing ripple cross stratififcation in beds interbedded with red mudstone (first picture in ipad).Ripples have unidirectional flow. Gypsum layers cross cut the outcrop. Here there are also some red clay-rich laminated layers interbe…	muddy green limestone	Lacustrine (deep to marginal lacustrine)	-2.46	0.06	-8.48	0.08	2016
Wuqia Group, Unit C	13.3236	311	KN456	KN456			Bulk carbonate samples (paleomag). Beige mudstone, massive	massive mudstone		-2.11	0.06	-6.7	0.06	2011
Wuqia Group, Unit C	13.3782	305	KN455-456	16KN47c	39.8884	77.2431	Interbedded green lime massive mudstone and red clay-rich laminated mudstone. Lime mudstone is always massive. Gypsum layers cross-cut the outcrop.	Calcareous organic rich green limie mudstone	Lacustrine	-1.99	0.05	-8.76	0.05	2016
Wuqia Group, Unit C	13.3843	304	KN455	KN455			Bulk carbonate samples (paleomag). Beige red claystone, massive	massive claystone		-1.29	0.06	-4.48	0.03	2011
Wuqia Group, Unit C	13.4421	294.5	KN454	16KN46c	39.8879	77.2436	Laminated green clay-rich mudstone interbedded with red flaser beds (ripple x cross strat). At the bottom, there are green limestone layers interpreted as deeper lake env. with less clastic input. So either the sequence is prograding or the lake is shrinking. Sample 16KN46c is massive green grey lime mudstone. Recrystalized gypsum is 4cm thick, and is interbedded with laminated limestone. Above t…	massive green lime mudstone	Lacustrine (deep lacustrine)	-1.37	0.04	-8.35	0.07	2016
Wuqia Group, Unit C	13.4421	294.5	KN454	KN454			Bulk carbonate samples (paleomag).			-1.53	0.05	-4.29	0.06
Wuqia Group, Unit C	13.503	284.5	KN453	KN453			Bulk carbonate samples (paleomag). Beige mudstone, laminated	laminated mudstone		-1.03	0.05	-7.42	0.07	2011
Wuqia Group, Unit C	13.5487	277	KN451-453	16KN45c	39.887	77.2447	Top part: Laminated clay to siltstone and ripple cross stratified, tabular. The green portion is organic rich and very calcareous, bed thickness 1-8 cm. Carmie took a sampple of this green part in case we do organic separation - we avoided ripples because they are coarse grained and could have detrital carbonate. Interbedded with green layers are very thin red beds of clay to siltstone, bed thick…	calcareous, organic, clay-rich laminated mudstone	Lacustrine (deltaic or marginal lacustrine)	-0.5	0.03	-8.9	0.06	2016
Wuqia Group, Unit C	13.5487	277	KN452	KN452			Bulk carbonate samples (paleomag). Beige mudstone, laminated	laminated mudstone		-1.74	0.05	-7.84	0.06	2011
Wuqia Group, Unit B	13.5943	269.5	KN451	KN451			Bulk carbonate samples (paleomag). Beige fine grained sandstone, laminated, carbonate cement	laminated sandstone		-1.73	0.05	-7.68	0.09	2011
Wuqia Group, Unit B	13.6125	265	KN450	KN450			Bulk carbonate samples (paleomag). Beige gray mudstone, laminated	laminated mudstone		-1.64	0.04	-8.42	0.08	2011
Wuqia Group, Unit B	13.6224	260	KN449	KN449			Bulk carbonate samples (paleomag). Beige yellowish, fine grained sandstone, massive, very friable	massive fine grained sandstone		-1.18	0.06	-7.56	0.06	2011
Wuqia Group, Unit B	13.6513	245.5	KN447	KN447			Bulk carbonate samples (paleomag). Beige orange red, claystone, massive	massive claystone		-2.78	0.05	-7.7	0.06	2011
Wuqia Group, Unit B	13.6603	241	KN446	KN446			Bulk carbonate samples (paleomag). Beige orange red, claystone, massive	massive claystone		-2.75	0.06	-7.99	0.06	2011
Wuqia Group, Unit B	13.6703	236	KN445	KN445			Bulk carbonate samples (paleomag). Beige siltstone, massive	massive siltstone		-0.9	0.05	-7.42	0.08	2011
Wuqia Group, Unit B	13.6782	232	KN444	KN444			Bulk carbonate samples (paleomag). Beige claystone, laminated	laminated claystone		-1.26	0.06	-7.75	0.04	2011
Wuqia Group, Unit B	13.6822	230	KN443-444	16KN44c	39.8851	77.246	Three staked paleosols. We sampled the bottom one. The bottom one is massive, clay-rich, calcareous throughout. It is at least 35 cm redish brown clay to silt with spheroidal weathering (Sm). The sample is 30 cm below top. The middle one os 55 cm thick. The lowest 40 cm is silt sized, massive brown mudstone (Sm). Between 40-0cm it fines upward from silt to clay. It changes in color to red brown a…	massive clay rich calcareous mudstone	Paleosol	-0.91	0.04	-7.66	0.09	2016
Wuqia Group, Unit B	13.6922	225	KN443	KN443			Bulk carbonate samples (paleomag). Beige mudstone, massive	massive mudstone		-0.92	0.06	-7.17	0.09	2011
Wuqia Group, Unit B	13.7061	218	KN442	KN442			Bulk carbonate samples (paleomag). Beige mudstone, massive	massive mudstone		-1.1	0.06	-8.07	0.09	2011
Wuqia Group, Unit B	13.7171	212.5	KN441	KN441			Bulk carbonate samples (paleomag). Beige mudstone, massive, white mottling is CaCO3	massive mudstone		-1.4	0.06	-7.89	0.1	2011
Wuqia Group, Unit B	13.733	204.5	KN440	KN440			Bulk carbonate samples (paleomag). Beige mudstone massive	massive mudstone		-1.32	0.04	-8.3	0.09	2011
Wuqia Group, Unit B	13.8584	190.5	KN439	KN439			Bulk carbonate samples (paleomag). Beige mudstone laminated	laminated mudstone		-1.96	0.05	-7.09	0.09	2011
Wuqia Group, Unit B	13.9072	186	KN438	KN438			Bulk carbonate samples (paleomag). Beige mudstone, massive	massive mudstone		-1.21	0.05	-6.77	0.1	2011
Wuqia Group, Unit B	13.9832	179	KN437	KN437			Bulk carbonate samples (paleomag). Beige mudstone, massive, CaCO3 white mottling	massive mudstone		-2.71	0.05	-8.3	0.08	2011
Wuqia Group, Unit B	14.0157	176	KN436	KN436			Bulk carbonate samples (paleomag). Beige mudstone, massive	mudstone		-0.36	0.05	-7.51	0.1	2011
Wuqia Group, Unit B	14.0728	170	KN435	KN435			Bulk carbonate samples (paleomag). Beige mudstone, massive	massive mudstone		-0.7	0.06	-7.46	0.1	2011
Wuqia Group, Unit B	14.1005	160	KN433	KN433			Bulk carbonate samples (paleomag). Beige, mudstone, massive	massive mudstone		-1.51	0.06	-7.66	0.09	2011
Wuqia Group, Unit B	14.1089	157	KN432	KN432			Bulk carbonate samples (paleomag). Beige mudstone, massive	massive mudstone		-1.21	0.06	-8.33	0.05	2011
Wuqia Group, Unit B	14.12	153	KN431	KN431			Bulk carbonate samples (paleomag). Beige mudstone, massive	massive mudstone		-2.15	0.06	-8.22	0.04	2011
Wuqia Group, Unit B	14.1366	147	KN430	KN430			Bulk carbonate samples (paleomag). Beige siltstone, massive, visible carbonate cement in white mottling	massive siltstone		-1.81	0.06	-7.49	0.08	2011
Wuqia Group, Unit B	14.1477	143	KN429	KN429			Bulk carbonate samples (paleomag). Beige mudstone, too small to tell. Has white carbonate cement	mudstone		-1.85	0.06	-7.53	0.08	2011
Wuqia Group, Unit B	14.1588	139	KN428	KN428			Bulk carbonate samples (paleomag). Beige mudstone, laminated, visible carbonate cement, fractures parallel to lamina filled up with white crystalline material	laminated mudstone		-2.16	0.06	-7.91	0.07	2011
Wuqia Group, Unit B	14.2417	136	KN427	KN427			Bulk carbonate samples (paleomag). Beige mudstone	massive mudstone		-1.26	0.06	-7.88	0.07	2011
Wuqia Group, Unit B	14.5303	130.5	KN426	KN426			Bulk carbonate samples (paleomag). Beige siltstone, massive, has carbonate cement throughout, but specially concentrated in lenses	massive siltstone		-0.81	0.05	-9.03	0.1	2011
Wuqia Group, Unit B	14.6162	127.5	KN425	KN425			Bulk carbonate samples (paleomag). Dark beige red, claystone, laminated (dark vs. white CaCO3 rich lamina)	laminated claystone		-1.99	0.03	-7.52	0.08	2011
Wuqia Group, Unit B	14.6523	120	KN424	KN424			Bulk carbonate samples (paleomag). Dark beige red, claystone, laminated, lenses of white mottling	laminated claystone		-1.42	0.05	-8.48	0.07	2011
Wuqia Group, Unit B	14.6691	116.5	KN423	KN423			Bulk carbonate samples (paleomag). Beige mudstone massive	massive mudstone		-2.15	0.05	-8.21	0.08	2011
Wuqia Group, Unit B	14.6812	114	KN422	KN422			Bulk carbonate samples (paleomag). Beige mudstone, laminated	laminated mudstone		-1.9	0.06	-8.08	0.09	2011
Wuqia Group, Unit B	14.7004	110	KN421	KN421			Bulk carbonate samples (paleomag). Beige red claystone, massive	massive claystone		-2.03	0.06	-7.64	0.1	2011
Wuqia Group, Unit B	14.7149	107	KN420	KN420			Bulk carbonate samples (paleomag). Beige red mudstone, looks massive	mudstone		-1.04	0.06	-7.6	0.05	2011
Wuqia Group, Unit B	14.7293	104	KN419	KN419			Bulk carbonate samples (paleomag). Beige mudstone, has white glue	mudstone		-1.36	0.03	-7.78	0.09	2011
Wuqia Group, Unit B	14.7533	99	KN418	KN418			Bulk carbonate samples (paleomag). Beige siltstone, looks massive, visible CaCO3 cement	massive siltstone		-1.3	0.06	-8.01	0.05	2011
Wuqia Group, Unit B	14.7678	96	KN417	KN417			Bulk carbonate samples (paleomag). Beige siltstone, looks massive, visible CaCO3 cement	massive siltstone		-1.51	0.03	-7.43	0.06	2011
Wuqia Group, Unit B	14.7815	93	KN416	KN416			Bulk carbonate samples (paleomag). Beige mudstone, laminated	laminated mudstone		-1.16	0.05	-7.6	0.06	2011
Wuqia Group, Unit B	14.7944	90	KN415	KN415			Bulk carbonate samples (paleomag). Beige mudstone massive	massive mudstone		-1.06	0.05	-7.08	0.06	2011
Wuqia Group, Unit B	14.816	85	KN414	KN414			Bulk carbonate samples (paleomag). Beige mudstone, massive, CaCO3 cement	massive mudstone		-1.31	0.05	-8.21	0.08	2011
Wuqia Group, Unit B	14.8376	80	KN413	KN413			Bulk carbonate samples (paleomag).			-1.32	0.05	-7.76	0.07	2011
Wuqia Group, Unit B	14.8549	76	KN412	KN412			Bulk carbonate samples (paleomag). Beige mudstone, massive, CaCO3 cement	massive mudstone		-0.79	0.07	-7.59	0.06	2011
Wuqia Group, Unit B	14.9645	69	KN411	KN411			Bulk carbonate samples (paleomag). Beige mudstone, massive, CaCO3 cement	massive mudstone		-0.77	0.05	-7.98	0.05	2011

## Sheet: Table S2 - Paleoenvironments
TABLE S2. DESCRIPTIONS, INTERPRETED PALEOENVIRONMENTS AND REFERENCES FOR LOCATIONS SHOWN IN FIGURE 4.
Site	Ref. in Fig. 4	Age	Description	Interpretation	Reference	Full citation
Paratethys	1	25 Ma	See Fig. 4	Area covered by Paratethys shown in Fig. 4.	Popov et al., 2010	Popov, S. V., Antipov, M.P., Zastrozhnov, A.S., Kurina, E.E., and Pinchuk, T.N., 2010, Sea-level fluctuations on the northern shelf of the Eastern Paratethys in the Oligocene-Neogene: Stratigraphy and Geological Correlation, v. 18, p. 200–224, doi:10.1134/S0869593810020073.
Paratethys	2	25 Ma	See Fig. 4	Area covered by Paratethys shown in Fig. 4.	Li et al., 2020	Li, Q., Li, L., Zhang, Y., and Guo, Z., 2020, Oligocene incursion of the Paratethys seawater to the Junggar Basin, NW China: insight from multiple isotopic analysis of carbonate: Scientific Reports, v. 10, p. 1–7, doi:10.1038/s41598-020-63609-0.
Tajik Basin	3	~25 Ma	Siltstone and sandstone	Eolian sandy loess underlying fluvial, flood plain	Wang et al., 2019	Wang, X. et al., 2019, Parathethys Last Gasp in Central Asia and Late Oligocene Accelerated Uplift of the Pamirs: Geophysical Research Letters, v. 46, p. 11773–11781, doi:10.1029/2019GL084838.
Issyk Kul	4	25 Ma	Dzhety Oguz Fm: poorly sorted clast-supported conglomerates and interlayered silstone and mudstone	High energy, braided river depositional environments and overbank deposits	Macauley et al., 2016; Cobbold et al., 1994.	Macaulay, E.A., Sobel, E.R., Mikolaichuk, A., Wack, M., Gilder, S.A., Mulch, A., Fortuna, A.B., Hynek, S., and Apayarov, F., 2016, The sedimentary record of the Issyk Kul basin, Kyrgyzstan: Climatic and tectonic inferences: Basin Research, v. 28, p. 57–80, doi:10.1111/bre.12098. Cobbold, P.R., Sadybakasov, E. & Thomas, J.C., 1994, Cenozoic transpression and basin development, Kyrgyz Tien Shan, Ce…
Issyk Kul	4	~15 Ma	Soguty Fm: mudstone to well-sorted sandstone with conglomeratic layers.	Meandering river	Macauley et al., 2016	Macaulay, E.A., Sobel, E.R., Mikolaichuk, A., Wack, M., Gilder, S.A., Mulch, A., Fortuna, A.B., Hynek, S., and Apayarov, F., 2016, The sedimentary record of the Issyk Kul basin, Kyrgyzstan: Climatic and tectonic inferences: Basin Research, v. 28, p. 57–80, doi:10.1111/bre.12098.
Aetarshi	5	~25 Ma	Sandstone	Fluvial and distal alluvial fan	Blayney et al., 2016	Blayney, T. et al., 2016, Indentation of the Pamirs with respect to the northern margin of Tibet: Constraints from the Tarim basin sedimentary record: Tectonics, v. 35, p. 2345–2369, doi:10.1002/2016TC004222.
Aetarshi	5	~15 Ma	Intercalated sandstone and mudstone underlying conglomerate	Braided and meandering river below proximal alluvial fan	Blayney et al., 2016	Blayney, T. et al., 2016, Indentation of the Pamirs with respect to the northern margin of Tibet: Constraints from the Tarim basin sedimentary record: Tectonics, v. 35, p. 2345–2369, doi:10.1002/2016TC004222.
Oytag	6	Most Miocene	"Conglomerate beds stack to form multistory lenticular bodies that fine upward over 10–20 meters. Pebble to cobble conglomerates are clast-supported, often imbricated, and are typically overlain by fine- to coarse-grained red and brown sandstone with floating pebbles. These successions may be separated by thick intervals (up to 60 m) of medium-grained sandstone with massive, laterally continuous …	"Braided fluvial fan made up of gravelly bars, sandstone bar top deposits, and sheet-flood deposits consisting of laterally continuous mudstone. Fining upward successions likely result from waning flow associated with channel abandonment."	Bershaw et al., 2012	Bershaw, J., Garzione, C.N., Schoenbohm, L., Gehrels, G., and Tao, L., 2012, Cenozoic evolution of the Pamir plateau based on stratigraphy, zircon provenance, and stable isotopes of foreland basin sediments at Oytag (Wuyitake) in the Tarim Basin (west China): Journal of Asian Earth Sciences, v. 44, p. 136–148, doi:10.1016/j.jseaes.2011.04.020.
WK	7	15-12.2 Ma	Sandstone and interbedded mudstones. Wuqia Group Unit B consists of siltstone, mudstone, and sandstone interpreted as fluvial and lacustrine deposits. Wuqia Group Unit C consists of green shale interpreted as ephemeral lacustrine deposits. Wuqia Group, lower Pakabulake Formation, consists of fluvio-lacustrine siltstone and sandstone (grey).	Wuqia Group Unit B, interpreted as meandering fluvial deposition. Wuqia Group Unit C, interpreted as shallow lacustrine and playa. Wuqia Group, lower Pakabulake Formation, interpreted as meandering river and floodplain.	Heermance et al. 2018	Heermance, R. V., Pearson, J., Moe, A., Langtao, L., Jianhong, X., Jie, C., Richter, F., Garzione, C.N., Junsheng, N., and Bogue, S., 2018, Erg deposition and development of the ancestral Taklimakan Desert (western China) between 12.2 and 7.0 Ma: Geology, v. 46, p. 919–922, doi:10.1130/G45085.1.
WK	7	12.2 - 7 Ma	Well-sorted, palered, fine-grained sandstone characterized by >1-m-thick, planar, continuous beds with meterscale cross-bedding.	Sand dunes	Heermance et al. 2018	Heermance, R. V., Pearson, J., Moe, A., Langtao, L., Jianhong, X., Jie, C., Richter, F., Garzione, C.N., Junsheng, N., and Bogue, S., 2018, Erg deposition and development of the ancestral Taklimakan Desert (western China) between 12.2 and 7.0 Ma: Geology, v. 46, p. 919–922, doi:10.1130/G45085.1.
WK	7	7-2.2 Ma	Interbedded fluvial sandstones and floodplain mudstones.	Atushi Formation (also called the Artux Formation), interpreted as channelized fluvial and floodplain.	Heermance et al. 2018	Heermance, R. V., Pearson, J., Moe, A., Langtao, L., Jianhong, X., Jie, C., Richter, F., Garzione, C.N., Junsheng, N., and Bogue, S., 2018, Erg deposition and development of the ancestral Taklimakan Desert (western China) between 12.2 and 7.0 Ma: Geology, v. 46, p. 919–922, doi:10.1130/G45085.1.
WK	7	2.2-1 Ma	Conglomerate with sandstone interbeds	Xiyu Formation, interpreted as braided stream and alluvial fan.	Heermance et al. 2018	Heermance, R. V., Pearson, J., Moe, A., Langtao, L., Jianhong, X., Jie, C., Richter, F., Garzione, C.N., Junsheng, N., and Bogue, S., 2018, Erg deposition and development of the ancestral Taklimakan Desert (western China) between 12.2 and 7.0 Ma: Geology, v. 46, p. 919–922, doi:10.1130/G45085.1.
Puska	8	25-5 Ma	Sandstone	Fluvial-eolian	Kent-Corson et al. (2009) - supplementary material	Kent-Corson, M.L., Ritts, B.D., Zhuang, G., Bovet, P.M., Graham, S.A., and Page Chamberlain, C., 2009, Stable isotopic constraints on the tectonic, topographic, and climatic evolution of the northern margin of the Tibetan Plateau: Earth and Planetary Science Letters, v. 282, p. 158–166, doi:10.1016/j.epsl.2009.03.011.
Mazartag	9	12-7 Ma	Mudstone and siltstone	Lacustrine	(Sun et al., 2006, 2009, 2017)	Sun, J., Zhang, Z., and Zhang, L., 2009, New evidence on the age of the Taklimakan Desert: Geology, v. 37, p. 159–162, doi:10.1130/G25338A.1. Sun, J., Liu, W., Liu, Z., Deng, T., Windley, B.F., and Fu, B., 2017, Extreme aridification since the beginning of the Pliocene in the Tarim Basin, western China: Palaeogeography, Palaeoclimatology, Palaeoecology, v. 485, p. 189–200, doi:10.1016/j.palaeo.20…
Mazartag	9	7-5 Ma	"The intercalated reddish sandstones in the middle part are characterized by their primary structures, especially cross-strata with a large scale and high dip angles (30° ± 2°). Commonly, the sand is poorly cemented, and is well sorted." Thicknesses range from 2 to 20 m. (Sun et al., 2009).	Sand dunes appeared at 7 Ma, but they were minor layers intercalated with lacustrine deposits. This implies that there were very limited dune fields in the interior of the basin between 7 and 5Ma (Sun et al., 2017). Permanent dunes occurred from ~5 Ma onward.	(Sun et al., 2006, 2009, 2017)	Sun, J., Liu, W., Liu, Z., Deng, T., Windley, B.F., and Fu, B., 2017, Extreme aridification since the beginning of the Pliocene in the Tarim Basin, western China: Palaeogeography, Palaeoclimatology, Palaeoecology, v. 485, p. 189–200, doi:10.1016/j.palaeo.2017.06.012."
Kashitashi and Pianaman	10	Pliocene	"Pliocene strata are mainly conglomeratic rocks"	Fluvial-alluvial environments	Graham et al 2005	Graham, S.A., Chamberlain, C.P., Yue, Y., Ritts, B.D., Hanson, A.D., Horton, T.W., Waldbauer, J.R., Poage, M.A., and Feng, X., 2005, Stable isotope records of cenozoic climate and topography, Tibetan plateau and Tarim basin: American Journal of Science, v. 305, p. 101–118, doi:10.2475/ajs.305.2.101.
Janggalsay	10	Miocene and Pliocene	Conglomerate rich with a number of mudstone and fine-grained sandstone interbeds	Miocene and Pliocene strata are deposited in fluvial depositional environments	Graham et al 2005	Graham, S.A., Chamberlain, C.P., Yue, Y., Ritts, B.D., Hanson, A.D., Horton, T.W., Waldbauer, J.R., Poage, M.A., and Feng, X., 2005, Stable isotope records of cenozoic climate and topography, Tibetan plateau and Tarim basin: American Journal of Science, v. 305, p. 101–118, doi:10.2475/ajs.305.2.101.
Ili Basin	11	Miocene	Mudstones and evaporites, limestones, Cross-bedded conglomeratic sandstones, Silty sandstones, Conglomeratic sandstones	0-100 m.: Recharge Playa 50-220 m.: Discharge Playa 170-320 m.: Perennial Lake 240-371 m.: Intermittent Lake Distinct steps of groundwater accumulation and salinization at ~14.3 and ~14.1 Ma occurred coeval to the MCT onset and culminated with maximum evaporation rates after ~13.8 Ma, probably in response to climate feedbacks related to the major Antarctic ice sheet expansion (Holbourn et al., 20…	Frisch et al., 2019	Frisch, K. et al., 2019, Long-Period Astronomical Forcing of Westerlies’ Strength in Central Asia During Miocene Climate Cooling: Paleoceanography and Paleoclimatology, v. 34, p. 1784–1806, doi:10.1029/2019PA003642.
Wuheshalu	12	ca. 17 Ma	At ca. 17 Ma (bottom of the Pakabulake Formation), the increase in the Paleozoic and Precambrian zircon components (Pamir) is synchronous with the transition from laminated sandstone mudstone complexes to sandstone sheets.	Increase of stream power and size of the source area (Pamir) of the Wuheshalu section	Chen et al., 2019	Chen, X., Chen, H., Sobel, E.R., Lin, X., Cheng, X., Yan, J., and Yang, S., 2019, Convergence of the Pamir and the South Tian Shan in the late Cenozoic: Insights from provenance analysis in the Wuheshalu section at the convergence area: Lithosphere, v. 11, p. 507–523, doi:10.1130/L1028.1.
Uluqgat	13	Miocene	Interbedding of reddish sandstone, reddish siltstone and grey–green siltstone in the lower and coarse reddish sandstone in the upper. sediments. In the upper part are dominated by reddish coarse-grained sandstone with massive structure or large-scale (>1 m) cross-bedding	Wuqia Group. Domination of coarse-grained nonmarine deposits, upward coarsening succession, high frequency alternations of red and grey–green beds suggest alluvial facies on the whole. Upper part dominated by aeolian dunes deposits. Modal size of the aeolian components through the Ulugqat section has a increasing upward trend likely document a long-term strengthening in the intensity of Westerlie…	Wang et al., 2014	Wang, X., Sun, D., Chen, F., Wang, F., Li, B., Popov, S. V., Wu, S., Zhang, Y., and Li, Z., 2014, Cenozoic paleo-environmental evolution of the Pamir-Tien Shan convergence zone: Journal of Asian Earth Sciences, v. 80, p. 84–100, doi:10.1016/j.jseaes.2013.10.027.
Tajik Basin	14	Miocene	Baldshuan Fm: Dominant tabular and thinly-bedded mudstones and sandstones in the Shurisay Member and the lower–middle Childara Member are floodplain-dominated deposits. The lenticular-shaped conglomerates and sandstones, which exhibit trough cross-bedding, were deposited in fluvial channels. The frequently observed horizontal stratification in the conglomerates further suggests deposition as long…	Baldshuan Fm: Braided river (~20-13.5 Ma) Chingou Fm: Braided river (13.5-12 Ma); Alluvial Fan (12-11 Ma); Braided River (11-8 Ma).	Li et al., 2021	Li, L., Dupont-Nivet, G., Najman, Y., Kaya, M., Meijer, N., Poujol, M., and Aminov, J., 2021, Middle to late Miocene growth of the North Pamir: Basin Research, p. 1–22, doi:10.1111/bre.12629.
Sanju	15	6.5-2 Ma	The Artux Formation was accumulated between 5.3 and 3 Ma and Xiyu Formation from 3 to 2 Ma. They examined the surface microtexture and particle size of the interbedded light yellow silt from the Xiyu and Artux Formations. Quartz grains show rounded grain shapes, with typical dish-shaped depressions (Fig. 1C), suggesting the grains have an eolian origin.	Initiation of windblown silt accumulation at Sanju occurred at 5.3 Ma, suggesting shifting sand dunes prevailed in the Tarim Basin by at least 5.3 Ma ago, as they do today.	Sun and Liu , 2006	Sun, J., and Liu, T., 2006, The age of the Taklimakan Desert: Science, v. 312, p. 1621, doi:10.1126/science.1124616.

## Sheet: Table S3. U-Pb data unknowns
TABLE S3. U-Pb Data Unknowns
				Isotope Ratios¶							Apparent Ages¶
	U	U/Th		207Pb	2 sigma	207Pb	2 sigma	206Pb	2 sigma	207Pb/235U v 206Pb/238U	207/235	2 sigma	206/238	2 sigma	207/206	2 sigma		Best age	2 sigma	Concordia	1 sigma	% discordance**
Analysis	(ppm)			206Pb	abs	235U	abs	238U	abs	error corr	age	abs err	age	abs err	age	abs err		age†	abs err	age*	abs err
											Ma	Ma	Ma	Ma	Ma	Ma		Ma	Ma		Ma
MVDZ05, Xiyu Fm, Fluvial
DZ05_3	879	4.19		0.0544	0.0026	0.232	0.013	0.0304	0.0014	0.75398	211.85	5.36	193.05	4.38	426.4	41.3		191.76	4.35	194.79	4.42	10
DZ05_87	774	2.721		0.0503	0.0018	0.2175	0.0068	0.03203	0.00093	0.659	199.83	2.84	203.24	2.9	159.7	29.2		203.47	2.91	201.41	2.61	-2
DZ05_96	588	10.42		0.0502	0.0016	0.239	0.012	0.0345	0.0015	0.76576	217.6	4.92	218.65	4.67	206.3	37.9		218.72	4.68	218.24	4.49	-0.55	high U/Th
DZ05_31	272	1.515		0.0524	0.0023	0.25	0.01	0.0348	0.0012	0.4912	226.58	4.06	220.52	3.74	289.9	43.3		220.1	3.73	223.04	3.36	3.1
DZ05_28	280	1.377		0.0525	0.0026	0.303	0.032	0.0393	0.0021	0.97467	268.7	12.5	248.49	6.51	449.1	60.9		247.04	6.48	230.19	2.81	12
DZ05_85	490	2.909		0.0558	0.0028	0.309	0.018	0.0404	0.0021	0.97456	273.41	6.98	255.31	6.51	431.3	15.5		254.01	6.47	232.2	6.92	13
DZ05_60	554	0.948		0.0522	0.0018	0.3	0.024	0.0406	0.0023	0.97917	266.4	9.37	256.55	7.12	353.9	30.6		255.84	7.1	238.15	4.69	9.1
DZ05_63	187	3		0.0526	0.0033	0.281	0.019	0.0367	0.0021	0.52178	251.45	7.53	232.35	6.53	433.7	68.7		230.99	6.49	238.87	6.11	9
DZ05_89	222.6	1.349		0.0499	0.0023	0.274	0.014	0.0392	0.0013	0.41844	245.89	5.58	247.87	4.03	227	55.3		248.01	4.03	247.39	3.82	-0.91
DZ05_41	454	2.117		0.0534	0.002	0.29	0.014	0.0388	0.0016	0.71038	258.56	5.51	245.39	4.96	379.7	39		244.45	4.95	249.45	4.84	6
DZ05_46	153.4	1.819		0.0511	0.0036	0.287	0.021	0.0409	0.0022	0.6471	256.2	8.28	258.41	6.81	236	64.8		258.57	6.82	257.88	6.63	-0.97
DZ05_27	434	1.08		0.0549	0.0022	0.307	0.017	0.0414	0.0022	0.7643	271.85	6.6	261.5	6.81	361.9	42.1		260.76	6.79	267.24	6.36	4.7
DZ05_95	211	2.076		0.0516	0.0022	0.307	0.017	0.0433	0.0016	0.75859	271.85	6.6	273.26	4.94	259.8	41.8		273.36	4.94	273.28	4.94	-0.59
DZ05_29	244	1.92		0.0533	0.0032	0.311	0.021	0.0439	0.003	0.072762	274.96	8.13	276.96	9.26	258	106		277.11	9.27	275.82	6.32	-0.89
DZ05_72	310	1.345		0.0527	0.003	0.32	0.022	0.044	0.0027	0.98375	281.9	8.46	277.58	8.34	317.9	15.7		277.26	8.33	277.17	8.82	1.8
DZ05_20	419	1.964		0.0524	0.0024	0.323	0.018	0.0447	0.002	0.82953	284.21	6.91	281.9	6.17	303.2	35.5		281.73	6.17	282.3	6.15	0.93
DZ05_8	151	3.072		0.0571	0.0036	0.343	0.016	0.0434	0.0016	0.3126	299.44	6.05	273.87	4.94	503.9	54.6		271.99	4.91	282.73	4.41	10
DZ05_24	393	2.054		0.0531	0.0024	0.335	0.016	0.0441	0.0018	0.57735	293.38	6.08	278.2	5.56	416	46		277.08	5.53	284.01	5.18	6.2
DZ05_50	1113	1.65		0.0626	0.004	0.395	0.03	0.0458	0.0034	0.91859	338	10.9	288.7	10.5	693	32.3		285	10.3	287	11.9	18
DZ05_2	273	2.003		0.0578	0.0039	0.36	0.029	0.0468	0.0016	0.83491	312.2	10.8	294.85	4.93	444	61.5		293.55	4.91	288.12	4.03	7.3
DZ05_77	363	2.156		0.0524	0.0024	0.329	0.021	0.0465	0.0028	0.71735	288.8	8.02	293	8.62	255	53.7		293.31	8.63	290.35	7.65	-1.8
DZ05_83	181	3.473		0.0544	0.0028	0.342	0.018	0.0459	0.0021	0.25177	298.69	6.81	289.3	6.47	372.7	68		288.61	6.46	293.65	5.27	3.8
DZ05_57	646	12.5		0.0514	0.0019	0.336	0.016	0.0464	0.0021	0.94465	294.14	6.08	292.38	6.47	308.1	17.8		292.25	6.47	294.21	6.12	0.88	high U/Th
DZ05_110	267	1.629		0.0521	0.0032	0.341	0.027	0.0473	0.0027	0.64972	297.9	10.2	297.92	8.31	298	69		297.92	8.31	297.92	8.12	0.0021
DZ05_100	401	2.032		0.051	0.0018	0.356	0.016	0.049	0.0023	0.67121	309.22	5.99	308.38	7.07	315.6	42.4		308.32	7.07	309.01	5.83	0.36
DZ05_64	289	1.155		0.0534	0.0025	0.378	0.025	0.0507	0.0029	0.96801	325.57	9.21	318.82	8.9	374.1	20.2		318.31	8.88	317.86	9.28	2.5
DZ05_56	205	2.47		0.0538	0.0024	0.395	0.024	0.0512	0.0017	0.62549	338.02	8.73	321.88	5.21	450.5	52.9		320.66	5.19	321.28	5.23	5.8
DZ05_78	141	1.395		0.0556	0.0033	0.409	0.025	0.054	0.0026	0.49088	348.15	9.01	339.03	7.95	409.5	62.9		338.33	7.93	342.44	7.28	3.2
DZ05_43	527	2.56		0.0522	0.0024	0.399	0.026	0.0563	0.0028	0.91997	340.92	9.44	353.08	8.54	258.8	31.6		354.02	8.57	353.33	8.32	-4.1
DZ05_32	218	1.574		0.0536	0.0021	0.436	0.023	0.0587	0.0024	0.76309	367.43	8.13	367.71	7.31	365.6	38.4		367.74	7.31	367.63	7.15	-0.092
DZ05_65	784	1.71		0.054	0.0022	0.443	0.022	0.0589	0.0026	0.58903	372.37	7.74	368.93	7.91	393.8	48		368.66	7.91	370.73	6.99	1.1
DZ05_9	408	1.98		0.0545	0.0021	0.44	0.019	0.0594	0.0019	0.60847	370.25	6.7	371.98	5.78	359.5	39.2		372.11	5.78	371.43	5.5	-0.55
DZ05_92	143	1.846		0.0581	0.0032	0.537	0.035	0.0666	0.0028	0.97054	436.4	11.6	415.64	8.46	547.7	28.8		413.93	8.43	383.91	5.72	11
DZ05_94	140	3.22		0.0534	0.0022	0.468	0.026	0.0622	0.0025	0.66091	389.81	8.99	388.99	7.59	394.6	46.9		388.93	7.58	389.2	7.37	0.25
DZ05_42	554	5.4		0.0579	0.0017	0.556	0.036	0.0674	0.0034	0.95328	448.9	11.7	420.5	10.3	597.4	24.5		418.1	10.2	391.7	10.3	12
DZ05_49	239	2.105		0.0528	0.0034	0.479	0.031	0.0651	0.0041	0.47775	397.4	10.6	406.6	12.4	344.3	73.8		407.3	12.4	400.62	9.73	-2.9
DZ05_80	307	4.23		0.0534	0.003	0.487	0.031	0.0637	0.0036	0.71246	402.9	10.6	398.1	10.9	430.3	51.3		397.7	10.9	400.71	9.97	1.5
DZ05_4	276.8	1.797		0.0552	0.0023	0.484	0.025	0.0642	0.0024	0.56039	400.81	8.55	401.12	7.27	399.1	48.9		401.14	7.27	401.02	6.86	-0.091
DZ05_97	67.7	2.282		0.054	0.0036	0.493	0.037	0.0647	0.0029	0.48373	407	12.6	404.15	8.78	422.9	73.9		403.92	8.77	404.66	8.54	0.83
DZ05_14	245	1.231		0.056	0.0023	0.508	0.025	0.0649	0.0028	0.63423	417.1	8.42	405.36	8.47	482.6	44		404.4	8.46	411.24	7.7	3.5
DZ05_52	131	0.783		0.0527	0.0027	0.495	0.031	0.0679	0.0036	0.71722	408.3	10.5	423.5	10.9	323.4	50.4		424.7	10.9	414.86	9.78	-4.6
DZ05_88	251	2.1		0.0548	0.0021	0.51	0.026	0.0668	0.0026	0.72844	418.45	8.74	416.85	7.86	427.3	39		416.72	7.85	417.34	7.63	0.46
DZ05_55	450	5.42		0.0597	0.0021	0.528	0.023	0.0662	0.0023	0.71928	430.48	7.64	413.22	6.95	523.9	33.4		411.81	6.93	418.65	6.8	4.9
DZ05_45	185	5.19		0.0576	0.0027	0.522	0.034	0.0669	0.0039	0.82225	426.5	11.3	417.5	11.8	475.6	41.3		416.7	11.8	422.8	11.1	2.7
DZ05_76	47.2	3.96		0.0581	0.0035	0.534	0.035	0.067	0.0032	0.53437	434.5	11.6	418.06	9.67	522.4	62.4		416.71	9.64	422.99	9.18	4.7
DZ05_51	218	2.054		0.0597	0.0029	0.535	0.029	0.0657	0.0038	0.66359	435.12	9.59	410.2	11.5	569.3	50.1		408.2	11.4	428.81	9.5	7.9
DZ05_105	255	0.774		0.0583	0.0029	0.539	0.026	0.0662	0.0037	0.6669	437.76	8.58	413.2	11.2	569	46.9		411.2	11.1	434.26	8.61	8
DZ05_38	331	2.698		0.0578	0.0027	0.578	0.033	0.0721	0.0032	0.89592	463.2	10.6	448.8	9.62	535.1	28.7		447.58	9.6	448.62	9.86	3.9
DZ05_19	90.5	1.332		0.059	0.0027	0.561	0.032	0.07	0.0039	0.87065	452.2	10.4	436.2	11.7	534.5	31.4		434.8	11.7	451.1	10.6	5.1
DZ05_99	81.2	1.073		0.0577	0.0032	0.59	0.041	0.0713	0.0042	0.78778	470.9	13.1	444	12.6	604.1	46.5		441.7	12.6	454.1	12.5	7.2
DZ05_107	500	1.735		0.0561	0.0021	0.572	0.03	0.0725	0.0036	0.73563	459.31	9.69	451.2	10.8	500.1	41		450.5	10.8	456.87	9.49	2.3
DZ05_37	275	1.862		0.0562	0.0021	0.569	0.03	0.0734	0.0035	0.44084	457.37	9.71	456.6	10.5	461.2	59		456.5	10.5	457.04	8.55	0.21
DZ05_68	643	1.125		0.058	0.0022	0.573	0.03	0.073	0.0036	0.74176	459.95	9.68	454.2	10.8	488.8	40.4		453.7	10.8	458.26	9.48	1.7
DZ05_11	180	1.076		0.0636	0.0036	0.634	0.039	0.0728	0.0027	0.24221	498.6	12.1	453	8.11	713.7	67.6		449.09	8.04	463.91	7.52	12
DZ05_53	1010	2.67		0.0576	0.0016	0.653	0.03	0.0828	0.0031	0.89491	510.32	9.21	512.81	9.23	499.2	22.9		513.03	9.23	511.53	8.93	-0.62
DZ05_70	275	1.135		0.0664	0.0027	1.035	0.061	0.1144	0.006	0.7061	721.4	15.2	698.3	17.4	794.2	45.2		695.8	17.3	714.6	15.1	4.5
DZ05_91	132.8	0.96		0.0643	0.0021	1.042	0.057	0.118	0.0058	0.79074	724.9	14.2	719	16.7	743.1	35.9		718.4	16.7	724.1	14.2	1.2
DZ05_84	288	8.47		0.0692	0.0024	1.08	0.05	0.1096	0.0051	0.73165	743.6	12.2	670.4	14.8	970.8	34.7		662.8	14.7	729.3	12.8	15
DZ05_75	147.6	1.079		0.0633	0.0029	1.068	0.058	0.1214	0.0068	0.95845	737.8	14.2	738.6	19.5	735.2	16.9		738.7	19.5	736.7	11.1	-0.29
DZ05_109	380	1.341		0.0647	0.002	1.076	0.049	0.1205	0.005	0.83327	741.7	12	733.4	14.4	766.6	26.8		732.6	14.4	741.7	12.1	1.7
DZ05_18	83.4	0.88		0.0639	0.0028	1.075	0.054	0.1223	0.0051	0.66443	741.2	13.2	743.8	14.6	733.3	40.7		744.1	14.7	742.1	12.6	-0.48
DZ05_82	95.1	0.619		0.0659	0.0033	1.14	0.064	0.1247	0.0055	0.59062	772.5	15.2	757.6	15.8	816	48.7		755.9	15.7	765.6	13.9	2.6
DZ05_59	195	0.747		0.0667	0.0022	1.168	0.071	0.1306	0.0066	0.98879	785.7	16.6	791.3	18.8	769.9	13.9		791.9	18.8	770.9	13.7	-2.8
DZ05_15	247	1.355		0.0657	0.0021	1.162	0.037	0.1277	0.0041	0.70542	782.89	8.69	774.7	11.7	806.2	25.7		773.8	11.7	782.45	8.71	1.5
DZ05_22	429	1.533		0.065	0.0021	1.18	0.048	0.1329	0.006	0.85983	791.3	11.2	804.4	17.1	754.6	24.4		805.8	17.1	785.5	10.4	-2.9
DZ05_36	339	2.16		0.0682	0.0027	1.216	0.048	0.1292	0.0056	0.74677	807.9	11	783.3	16	876.5	30.7		780.6	15.9	810.1	11.1	4.8
DZ05_30	129	1.759		0.0658	0.0035	1.23	0.12	0.133	0.011	0.97203	814.3	27.3	805	31.3	840.1	27		803.9	31.3	827.5	25.5	3
DZ05_67	754	9.7		0.0696	0.0026	1.316	0.075	0.1377	0.007	0.72621	852.8	16.4	831.6	19.8	908.1	41.5		829.2	19.8	848.8	16.5	3.6
DZ05_35	121.3	1.473		0.0682	0.002	1.263	0.073	0.1339	0.0073	0.96184	829.3	16.4	810.1	20.8	881	16.4		807.9	20.7	855.1	13.6	5.9
DZ05_104	87.2	0.947		0.0734	0.0028	1.402	0.058	0.1393	0.0061	0.62185	889.8	12.3	840.7	17.3	1013.8	37.6		834.9	17.1	884.3	12.4	8.3
DZ05_79	145.4	1.716		0.0715	0.003	1.438	0.08	0.1453	0.0068	0.7957	904.9	16.7	874.6	19.1	979.7	34.4		870.9	19.1	899	17	4.9
DZ05_26	259	2.16		0.0749	0.0036	1.465	0.094	0.1442	0.0088	0.8198	916.1	19.4	868.4	24.8	1032.8	38.1		862.6	24.6	920.1	20	8.3
DZ05_39	525	3.68		0.0713	0.0026	1.504	0.068	0.1546	0.0075	0.96347	932	13.8	926.7	20.9	944.6	13.4		926	20.9	938.48	9.01	1.4
DZ05_102	396	1.526		0.0723	0.0025	1.51	0.1	0.1521	0.0099	0.97625	934.4	20.2	912.7	27.7	986	14.6		910	27.6	970.6	12.6	6.7
DZ05_5	103	2.197		0.0747	0.003	1.718	0.089	0.167	0.01	0.93782	1015.3	16.6	995.6	27.6	1058.1	21.4		993	27.6	1032.4	11.7	4.1
DZ05_73	431	9.7		0.0752	0.0029	1.7	0.13	0.164	0.012	0.97725	1008.5	24.4	979	33.2	1073.3	16.4		975.1	33.1	1059	14.7	8.5
DZ05_33	150.8	0.481		0.0933	0.0031	3.11	0.11	0.241	0.011	0.82738	1435.2	13.6	1391.9	28.6	1499.9	24.3		1499.9	24.3	1451.7	11.4	5.3
DZ05_98	164	1.424		0.0958	0.0031	3.43	0.19	0.258	0.014	0.98887	1511.3	21.8	1479.6	35.9	1556	7.75		1556	7.75	1553.75	7.3	5.5
DZ05_58	51.4	1.679		0.1034	0.0033	4.18	0.18	0.296	0.012	0.63006	1670.1	17.6	1671.4	29.8	1668.4	33.3		1668.4	33.3	1670.1	17.6	-0.13
DZ05_81	80	2.03		0.1048	0.0047	4.34	0.19	0.305	0.015	0.61301	1701	18.1	1716.1	37	1682.5	38		1682.5	38	1699.6	17.8	-1.4
DZ05_44	152	1.759		0.1084	0.0037	4.4	0.23	0.298	0.014	0.63926	1712.3	21.6	1681.4	34.8	1750.4	38.8		1750.4	38.8	1712.8	21.8	2.9
DZ05_21	565	1.949		0.1078	0.0028	4.43	0.22	0.294	0.015	0.93694	1718	20.6	1661.5	37.4	1787.5	16.3		1787.5	16.3	1761.9	13.1	6.8
DZ05_12	72.3	1.59		0.1075	0.003	4.89	0.2	0.327	0.013	0.86697	1800.5	17.2	1823.8	31.6	1773.7	19		1773.7	19	1789	14.6	-2.4
DZ05_34	122	0.957		0.1114	0.0032	4.85	0.19	0.3167	0.0081	0.73092	1793.6	16.5	1773.6	19.8	1817	24.4		1817	24.4	1789.9	16.6	1.8
DZ05_90	94.4	2.256		0.1105	0.0028	4.71	0.18	0.306	0.012	0.86371	1769	16	1721	29.6	1826.2	18.3		1826.2	18.3	1792.5	13.2	5
DZ05_13	42.1	0.875		0.111	0.004	4.86	0.21	0.309	0.014	0.7387	1795.3	18.2	1735.8	34.5	1865.3	28.9		1865.3	28.9	1808.7	17.3	5.6
DZ05_101	72	3.083		0.1109	0.0028	4.91	0.18	0.319	0.012	0.86111	1804	15.5	1784.8	29.3	1826.2	17.8		1826.2	17.8	1813.1	12.8	1.9
DZ05_54	154.2	2.642		0.1115	0.0035	4.67	0.21	0.3	0.015	0.98616	1761.9	18.8	1691.3	37.2	1846.61	8.46		1846.61	8.46	1825.86	5.56	8.8
DZ05_62	324	1.771		0.1152	0.0037	5.44	0.24	0.349	0.015	0.74823	1891.2	18.9	1929.8	35.8	1849	28		1849	28	1882	18	-3.4
DZ05_25	208	1.169		0.1175	0.0036	5.3	0.25	0.322	0.016	0.92128	1868.9	20.1	1799.5	39	1946.9	17.3		1946.9	17.3	1914.6	13.2	7.4
DZ05_1	50.7	0.789		0.1176	0.0039	6.06	0.4	0.374	0.017	0.8268	1984.5	28.8	2048.2	39.9	1918.8	34.3		1918.8	34.3	1969.9	27.6	-5.4
DZ05_74	113.9	1.081		0.1348	0.0042	6.57	0.42	0.351	0.02	0.98412	2055.3	28.2	1939.4	47.7	2173.7	11.2		2173.7	11.2	2188.25	9.22	14
DZ05_47	540	3.38		0.1667	0.0096	8.48	0.82	0.383	0.036	0.80524	2283.8	43.9	2090.3	83.9	2461.8	50.3		2461.8	50.3	2351.4	38.2	15
DZ05_17	461	3.06		0.1528	0.0066	9.54	0.58	0.454	0.026	0.78948	2391.4	27.9	2413	57.6	2373.1	32.8		2373.1	32.8	2384.6	25.1	-1.6
DZ05_66	541	2.213		0.1614	0.0062	10.12	0.52	0.47	0.024	0.86265	2445.8	23.7	2483.6	52.6	2414.5	22.8		2414.5	22.8	2429.3	18.7	-2.8
DZ05_6	94	1.33		0.1714	0.0068	10.93	0.68	0.464	0.023	0.83801	2517.2	28.9	2457.2	50.6	2565.9	28.5		2565.9	28.5	2542.3	25.7	4.3
DZ05_106	565	1.247		0.1866	0.0054	12.96	0.65	0.51	0.026	0.85646	2676.7	23.6	2656.6	55.5	2692	22.4		2692	22.4	2684.9	18	1.4
DZ05_93	518	29.6		0.2626	0.0083	24.93	0.99	0.687	0.028	0.74203	3305.5	19.4	3371.2	53.5	3265.9	22.7		3265.9	22.7	3290.3	17.1	-3.5	high U/Th
MVDZ05, discordant analyses (excluded from plots and interpretation)
DZ05_7	197	1.5		0.0579	0.0028	0.39	0.026	0.0479	0.002	0.98626	334.37	9.5	301.62	6.15	569	28.7		299.14	6.1	254.25	2.47	22
DZ05_108	409	2.161		0.068	0.0042	0.338	0.021	0.036	0.0016	0.4912	295.66	7.97	227.99	4.98	871.4	57.9		223.09	4.87	233.09	5.01	29
DZ05_61	755	2.59		0.077	0.0025	1.392	0.077	0.1299	0.0082	0.97773	885.5	16.3	787.3	23.4	1139.7	14.6		775.9	23.1	1032.7	7.48	30
DZ05_69	634	1.817		0.0753	0.0036	0.683	0.035	0.0649	0.0025	0.55119	528.6	10.6	405.36	7.57	1103.6	44		394.76	7.38	415.88	7.76	33
DZ05_48	111.9	3.31		0.0762	0.0072	0.476	0.052	0.0434	0.0025	0.48699	395.3	17.9	273.87	7.72	1185.7	94.3		264.49	7.46	267.1	7.75	43
DZ05_10	70.6	1.61		0.09	0.012	0.539	0.066	0.0448	0.0034	0.22495	437.8	21.8	282.5	10.5	1366	124		270.2	10	296.1	10.4	52
DZ05_71	1033	4.44		0.1184	0.0098	2.05	0.15	0.1272	0.0074	0.39963	1132.3	25	771.9	21.2	1909.2	65.6		724.5	19.9	837.5	21.9	56
DZ05_16	281	3.35		0.155	0.017	9.8	3.9	0.394	0.074	0.94921	2416	183	2141	171	2657	189		2657	189	1733	114	58
DZ05_86	493	0.84		0.0863	0.0061	0.473	0.051	0.0407	0.0025	0.95065	393.3	17.6	257.17	7.74	1299.2	51.5		246.72	7.43	180.98	3.67	64
DZ05_40	728	1.957		0.135	0.019	1.37	0.25	0.0721	0.0043	0.53964	876.2	53.6	448.8	12.9	2200	138		416.5	12	410.7	11.9	92
DZ05_23	89	0.965		0.186	0.026	3.79	0.69	0.141	0.012	0.53859	1590.6	73.1	850.3	33.9	2784	126		721.7	29.1	750.4	32.8	110
DZ05_103	190	0.586		0.0709	0.0023	1.588	0.068	0.1664	0.0063	0.94192	965.5	13.3	992.2	17.4	905.1	15		995.7	17.5	941.5	11.8	-5.9
MVDZ04, Atushi Fm, Fluvial
DZ04_82	214	0.913		0.0556	0.0024	0.37	0.023	0.0473	0.0023	0.71157	319.65	8.52	297.92	7.08	481.2	48.5		296.3	7.04	301.6	7.08	8.1
DZ04_21	124.4	0.913		0.0576	0.0028	0.553	0.039	0.0682	0.0039	0.9325	447	12.7	425.3	11.8	560	29.3		423.5	11.7	420.4	12.4	6.4
DZ04_26	119	1.002		0.0553	0.0026	0.501	0.029	0.0685	0.0031	0.66123	412.38	9.81	427.11	9.35	330.7	49.9		428.31	9.38	420.6	8.62	-4.3
DZ04_81	146	0.434		0.0579	0.0029	0.559	0.034	0.0687	0.0027	0.84435	450.9	11.1	428.32	8.14	567.6	37.8		426.44	8.11	421.33	8.05	6.9
DZ04_32	134	1.307		0.0616	0.0038	0.569	0.036	0.0677	0.0026	0.33529	457.4	11.6	422.28	7.85	637.7	66.7		419.36	7.8	429.79	7.47	9.7
DZ04_56	171	0.827		0.0585	0.0036	0.554	0.042	0.0678	0.0042	0.61537	447.6	13.7	422.9	12.7	576.7	67		420.8	12.6	432.3	12	6.9
DZ04_108	479	2.14		0.0564	0.0022	0.547	0.03	0.0713	0.0034	0.98277	443.03	9.85	444	10.2	438.1	13.2		444.1	10.2	442.5	9.69	-0.4
DZ04_53	223	1.262		0.056	0.0025	0.56	0.029	0.0717	0.0027	0.77813	451.53	9.44	446.39	8.12	477.8	36.1		445.96	8.11	447.25	8.09	1.4
DZ04_35	134.4	0.934		0.0552	0.0029	0.55	0.025	0.0729	0.003	0.46428	445	8.19	453.6	9.01	400.7	50.4		454.32	9.03	448.51	7.29	-2.4
DZ04_51	155	1.215		0.0553	0.0022	0.558	0.028	0.0739	0.0032	0.67304	450.22	9.12	459.61	9.6	402.6	42.9		460.4	9.62	454.12	8.49	-2.6
DZ04_73	200	0.783		0.058	0.0022	0.569	0.025	0.0731	0.003	0.58866	457.37	8.09	454.81	9.01	470.3	42.7		454.59	9.01	456.42	7.57	0.72
DZ04_64	94.7	0.83		0.0581	0.003	0.577	0.028	0.0724	0.0031	0.54947	462.53	9.01	450.6	9.32	522.2	47.9		449.59	9.3	456.93	8.12	3.3
DZ04_62	364	1.21		0.0586	0.0023	0.577	0.037	0.0718	0.0041	0.92397	462.5	11.9	447	12.3	540.5	26.9		445.7	12.3	457.6	12.4	4.5
DZ04_10	54	0.978		0.0569	0.0037	0.588	0.043	0.0726	0.004	0.54988	469.6	13.7	451.8	12	557.5	68.5		450.3	12	457.9	11.3	4.7
DZ04_41	281	1.013		0.0563	0.0024	0.575	0.03	0.0736	0.0026	0.70558	461.24	9.67	457.81	7.81	478.4	40.9		457.6	7.8	458.34	7.74	0.91
DZ04_30	184	1.416		0.0558	0.0022	0.57	0.032	0.0737	0.0033	0.98559	458	10.3	458.41	9.91	456	15.8		458.44	9.91	458.76	9.73	-0.15
DZ04_45	156	0.786		0.0567	0.003	0.577	0.038	0.0738	0.0034	0.69213	462.5	12.2	459	10.2	480.1	52.5		458.7	10.2	459.8	10	0.93
DZ04_42	164	1.074		0.0593	0.0031	0.582	0.028	0.0731	0.0031	0.37809	465.75	8.99	454.81	9.31	520	55.6		453.88	9.29	460.54	7.63	3
DZ04_33	102	1.379		0.0547	0.0028	0.57	0.037	0.074	0.0031	0.866	458	12	460.21	9.3	447	39.4		460.39	9.31	460.78	9.15	-0.63
DZ04_49	175	1.057		0.0553	0.0029	0.578	0.025	0.0753	0.0038	0.53159	463.18	8.04	468	11.4	439.3	50.9		468.4	11.4	463.97	7.86	-1.4
DZ04_59	265	0.726		0.0598	0.0027	0.592	0.036	0.0745	0.0031	0.70982	472.1	11.5	463.21	9.3	515.8	47.1		462.66	9.29	464.55	9.26	2.3
DZ04_100	245	0.471		0.0597	0.0041	0.61	0.047	0.0748	0.0032	0.53349	483.6	14.8	465.01	9.6	572.5	70.9		463.42	9.56	466.7	9.56	4.8
DZ04_87	82.9	1.278		0.0564	0.0031	0.594	0.037	0.075	0.0038	0.93791	473.4	11.8	466.2	11.4	508.5	25.2		465.6	11.4	467.5	11.6	1.9
DZ04_78	350	1.722		0.0567	0.0026	0.584	0.04	0.0742	0.005	0.92817	467	12.8	461.4	15	494.7	28.4		460.9	15	469.5	12.7	2.1
DZ04_67	431	2.39		0.0564	0.002	0.6	0.039	0.0778	0.0055	0.94571	477.2	12.4	483	16.4	449.7	25.6		483.5	16.5	471.4	10.7	-2.7
DZ04_34	220	1.285		0.0558	0.0026	0.587	0.029	0.0768	0.003	0.2012	468.95	9.28	476.99	8.98	429.8	62.9		477.68	8.99	473.12	7.05	-2.1
DZ04_95	226	1.319		0.0573	0.0025	0.604	0.031	0.0759	0.0045	0.69964	479.77	9.81	471.6	13.5	519	47.7		470.9	13.5	479.43	9.84	2.5
DZ04_50	506	1.235		0.0685	0.0034	0.696	0.041	0.0742	0.0036	0.65354	536.4	12.3	461.4	10.8	869.5	47.4		454.8	10.7	480	10.9	19
DZ04_61	126	1.171		0.0613	0.003	0.649	0.047	0.0756	0.0048	0.72978	507.9	14.5	469.8	14.4	683.1	54.1		466.5	14.3	486.9	13.9	9.8
DZ04_48	351	1.384		0.0577	0.0021	0.619	0.028	0.078	0.0033	0.92665	489.22	8.78	484.17	9.87	512.9	18.7		483.74	9.86	490.38	8.83	1.7
DZ04_55	346	1.893		0.0603	0.0028	0.631	0.047	0.0795	0.0046	0.7806	496.7	14.6	493.1	13.7	513.3	51.1		492.8	13.7	494.4	13.4	0.9
DZ04_106	30.5	0.975		0.061	0.0048	0.672	0.056	0.0796	0.004	0.46732	521.9	17	493.7	11.9	647.3	80.1		491.3	11.9	498.9	11.7	6.9
DZ04_18	177	1.261		0.0573	0.0024	0.695	0.036	0.0888	0.0033	0.58549	535.8	10.8	548.44	9.77	482.4	47		549.57	9.79	543.5	9.02	-2.9
DZ04_69	72.8	1.284		0.0647	0.0032	0.78	0.043	0.0862	0.0035	0.57672	585.5	12.3	533	10.4	794.5	48.1		528.2	10.3	547.2	10.1	12
DZ04_3	182	1.037		0.06	0.0019	0.857	0.045	0.1016	0.0054	0.66659	628.5	12.3	623.8	15.8	645.5	46.4		623.3	15.8	627.8	12.2	1.1
DZ04_12	73.1	1.19		0.0624	0.0029	0.897	0.049	0.1042	0.0037	0.57131	650.1	13.1	639	10.8	689	48		637.9	10.8	642	10.4	2.3
DZ04_20	232	1.054		0.0642	0.0027	1.025	0.064	0.1159	0.0077	0.96091	716.4	16	706.9	22.2	746.3	19.5		705.9	22.2	728.7	12	3.3
DZ04_114	90.1	0.877		0.0674	0.0027	1.152	0.066	0.1267	0.0059	0.71675	778.2	15.6	769	16.9	804.6	42.2		768	16.9	774.8	15	1.6
DZ04_39	186	0.814		0.0654	0.0025	1.198	0.055	0.1335	0.0056	0.96751	799.7	12.7	807.8	15.9	777.1	12.5		808.7	15.9	788	10.6	-2.7
DZ04_60	174	0.861		0.0661	0.0028	1.178	0.06	0.1304	0.0061	0.9163	790.4	14	790.1	17.4	791	21.4		790.1	17.4	790.5	13.5	0.054
DZ04_110	42.7	0.432		0.0676	0.0032	1.246	0.095	0.1331	0.0068	0.96124	821.6	21.5	805.5	19.3	865.4	31.7		803.7	19.3	790.7	19.7	4.1
DZ04_11	425	1.363		0.0663	0.0029	1.155	0.08	0.126	0.01	0.95612	779.6	18.8	765	28.6	821.6	25.2		763.4	28.6	796	12.9	4.4
DZ04_98	448	2.57		0.0704	0.0025	1.22	0.069	0.1271	0.0061	0.74449	809.8	15.8	771.3	17.4	917.1	39.3		767	17.4	796.8	15.9	6.7
DZ04_74	55.6	0.316		0.0668	0.0027	1.222	0.057	0.1296	0.0049	0.60789	810.7	13	785.6	14	880.3	39.5		782.8	13.9	800	12.3	4.3
DZ04_22	221	1.281		0.0672	0.0024	1.206	0.07	0.1315	0.0059	0.7784	803.4	16.1	796.4	16.8	822.6	38		795.6	16.8	800.5	15.6	1.2
DZ04_66	38.2	0.511		0.069	0.0033	1.213	0.073	0.1323	0.0048	0.68688	806.6	16.7	801	13.7	822	46		800.3	13.7	802	13.5	0.97
DZ04_91	223	0.516		0.0642	0.0025	1.205	0.067	0.1356	0.0064	0.83241	802.9	15.4	819.7	18.2	756.4	32.5		821.6	18.2	803.5	15.2	-3.1
DZ04_68	128.6	0.322		0.0735	0.0042	1.32	0.09	0.1285	0.0066	0.57024	854.5	19.7	779.3	18.9	1055.1	57.8		770.7	18.7	809.3	17.8	13
DZ04_86	164	0.962		0.0674	0.0029	1.234	0.056	0.1312	0.0053	0.67177	816.2	12.7	794.7	15.1	875.1	36.3		792.3	15.1	810.6	12.6	3.7
DZ04_80	386	0.641		0.0648	0.0021	1.265	0.051	0.1408	0.0053	0.76915	830.2	11.4	849.2	15	779.5	28		851.4	15	829.9	11.3	-3.4
DZ04_93	119.1	1.094		0.0662	0.0031	1.267	0.081	0.1371	0.0069	0.96106	831	18.1	828.2	19.6	838.6	21.7		827.9	19.6	832.2	18.2	0.59
DZ04_44	344	0.986		0.0667	0.0028	1.319	0.087	0.1469	0.0078	0.88057	854.1	19	883.6	21.9	778.3	33.3		887	22	852.4	18.3	-5.2
DZ04_109	655	1.086		0.0665	0.0025	1.34	0.069	0.1446	0.0071	0.96712	863.2	15	870.6	20	844.3	13.6		871.5	20	852.5	11.5	-2.3
DZ04_71	122.3	0.725		0.067	0.003	1.334	0.055	0.1439	0.0063	0.59285	860.6	12	866.7	17.8	845.1	40		867.4	17.8	861.1	11.9	-1
DZ04_104	354	1.81		0.0731	0.0035	1.34	0.061	0.1354	0.008	0.67631	863.2	13.2	818.6	22.7	979.6	44.7		813.4	22.6	867.6	13.2	8.3
DZ04_52	129.7	0.422		0.0675	0.003	1.202	0.058	0.1276	0.0057	0.98751	801.5	13.4	774.2	16.3	878.3	8.45		771.1	16.2	872.63	7.77	13
DZ04_72	238	0.763		0.0665	0.0024	1.383	0.054	0.1485	0.0067	0.68991	881.7	11.5	892.5	18.8	854.6	34.9		893.8	18.8	880.7	11.4	-1.9
DZ04_19	211	1.047		0.0729	0.0041	1.47	0.12	0.1429	0.0078	0.35466	918.1	24.7	861	22	1058	81		854.2	21.8	883.2	19.5	9
DZ04_16	615	0.981		0.0695	0.0029	1.4	0.1	0.15	0.012	0.6923	888.9	21.2	901	33.6	859.1	62.2		902.4	33.7	888	21	-2.1
DZ04_101	82	10.04		0.0801	0.0065	1.53	0.12	0.1436	0.0078	0.56266	942.5	24.1	865	22	1128.3	65.4		855.5	21.8	891.6	21.2	12	high U/Th
DZ04_47	233	0.703		0.0706	0.0025	1.459	0.065	0.1557	0.0068	0.65263	913.6	13.4	932.8	19	867.4	38.1		935.2	19	914.8	13.3	-3.1
DZ04_92	147.2	0.414		0.0727	0.0025	1.532	0.085	0.1521	0.0059	0.74767	943.3	17	912.7	16.5	1015.4	37.4		909.9	16.5	925	16.1	4.7
DZ04_43	790	1.052		0.0765	0.0058	1.55	0.11	0.1436	0.0089	0.80435	950.5	21.9	865	25.1	1154.1	42.1		854.5	24.8	930.5	24	14
DZ04_40	62.3	1.271		0.0702	0.0034	1.521	0.067	0.1592	0.0065	0.66988	938.9	13.5	952.3	18.1	907.5	35.6		954	18.1	940.2	13.3	-2.1
DZ04_84	254	0.903		0.0757	0.0032	1.52	0.069	0.1461	0.008	0.76396	938.5	13.9	879.1	22.5	1080.7	35.6		871.8	22.3	950.8	13.7	11
DZ04_77	314	0.778		0.0733	0.0023	1.575	0.058	0.1583	0.0055	0.75357	960.4	11.4	947.3	15.3	990.5	25.6		945.7	15.3	960.5	11.5	2.1
DZ04_57	106	0.481		0.0729	0.0025	1.605	0.057	0.1557	0.0056	0.60766	972.2	11.1	932.8	15.6	1062.1	31.8		927.8	15.5	967.3	11.2	6.1
DZ04_1	228	1.269		0.0712	0.0025	1.57	0.082	0.1588	0.0075	0.99485	958.4	16.2	950.1	20.9	977.57	7.23		949.1	20.8	982.17	6.36	3.6
DZ04_113	523	4.11		0.071	0.0029	1.651	0.068	0.1678	0.0083	0.76084	989.9	13	1000	22.9	967.7	33		1001.3	22.9	987.5	12.5	-1.7
DZ04_4	375	3.9		0.0726	0.0025	1.714	0.072	0.1667	0.0074	0.69181	1013.8	13.5	993.9	20.4	1057	34.2		991.3	20.4	1014.6	13.5	3.1
DZ04_85	95.2	0.48		0.0728	0.0032	1.71	0.13	0.165	0.011	0.92144	1012.3	24.4	984.5	30.4	1072.9	29.9		980.8	30.3	1029.4	23.7	5.3
DZ04_24	314	1.389		0.0868	0.0034	2.22	0.11	0.1849	0.0062	0.9331	1187.4	17.3	1093.7	16.9	1362.2	21.1		1079.7	16.7	1037.6	21.9	17
DZ04_107	222.5	2.11		0.0749	0.0032	1.924	0.084	0.1893	0.0094	0.68615	1089.5	14.6	1117.6	25.5	1033.7	37.8		1033.7	37.8	1086.1	14.4	-4.1
DZ04_17	415	7.8		0.0738	0.0033	1.95	0.12	0.191	0.011	0.81177	1098.4	20.7	1126.8	29.8	1042.7	37.1		1042.7	37.1	1091.9	20.1	-4.2
DZ04_94	223	1.771		0.076	0.0038	2.09	0.1	0.199	0.012	0.73451	1145.5	16.4	1169.9	32.3	1099.6	41.1		1099.6	41.1	1140.1	15.6	-3.5
DZ04_23	367	1.124		0.0799	0.004	2.07	0.13	0.191	0.012	0.74948	1138.9	21.5	1126.8	32.5	1162.1	44.1		1162.1	44.1	1140.5	21.4	1.7
DZ04_90	399	0.878		0.0783	0.0029	2.062	0.09	0.1854	0.0087	0.73285	1136.3	14.9	1096.4	23.7	1213.3	32.7		1213.3	32.7	1141.7	14.9	5.7
DZ04_37	166.8	1.271		0.0984	0.0032	3.93	0.15	0.289	0.01	0.68489	1619.9	15.4	1636.5	25	1598.3	27.1		1598.3	27.1	1618.6	15.3	-1.7
DZ04_7	172	1.328		0.1009	0.0039	3.94	0.19	0.289	0.013	0.75527	1621.9	19.5	1636.5	32.5	1603.1	30.5		1603.1	30.5	1619	19	-1.5
DZ04_9	71.9	0.927		0.1079	0.0036	4.8	0.21	0.309	0.014	0.67426	1784.9	18.4	1735.8	34.5	1842.8	32.5		1842.8	32.5	1791.4	18.1	4.6
DZ04_38	164	1.289		0.1133	0.0037	4.91	0.41	0.317	0.023	0.92795	1804	35.2	1775.1	56.3	1837.6	28.5		1837.6	28.5	1827.8	26.7	3.4
DZ04_118	73.4	0.752		0.111	0.0062	5.15	0.32	0.333	0.021	0.6987	1844.4	26.4	1852.9	50.8	1834.8	44		1834.8	44	1842.9	25.6	-0.77
DZ04_79	133	0.879		0.1122	0.005	5.17	0.35	0.333	0.015	0.69749	1847.7	28.8	1852.9	36.3	1841.8	43.9		1841.8	43.9	1848.4	28.5	-0.46
DZ04_28	315	0.593		0.1169	0.004	4.76	0.27	0.294	0.017	0.9949	1777.9	23.8	1661.5	42.3	1917.39	5.28		1917.39	5.28	1908.29	4.3	16
DZ04_76	109	0.638		0.125	0.0087	5.82	0.46	0.349	0.014	0.67735	1949.4	34.2	1929.8	33.5	1970.2	53.2		1970.2	53.2	1938.6	31.4	1.8
DZ04_75	275.7	0.836		0.1539	0.006	8.25	0.35	0.395	0.017	0.68207	2258.8	19.2	2146	39.3	2362.7	29.1		2362.7	29.1	2277.4	18.6	8.6
DZ04_116	262.7	2.61		0.164	0.0053	10.85	0.47	0.49	0.022	0.96393	2510.4	20.1	2570.7	47.6	2461.9	10.1		2461.9	10.1	2471.8	9.35	-4.8
DZ04_6	249	1.108		0.1614	0.0056	11.4	1.1	0.495	0.031	0.97823	2556.4	45	2592.3	66.8	2528.1	31.5		2528.1	31.5	2501.2	27.9	-4.6
DZ04_97	207	0.978		0.1626	0.0073	11.02	0.61	0.479	0.027	0.89045	2524.8	25.8	2522.9	58.8	2526.4	22		2526.4	22	2525.7	18.3	0.14
DZ04_103	723	1.461		0.1687	0.0068	11.22	0.43	0.477	0.024	0.67698	2541.6	17.9	2514.2	52.4	2563.5	31.2		2563.5	31.2	2546.4	16.2	1.8
DZ04_5	515	2.38		0.1821	0.0085	10.52	0.99	0.428	0.056	0.95738	2481.7	43.6	2297	126	2636.8	40.7		2636.8	40.7	2564.8	16.9	14
DZ04_112	323	0.919		0.1829	0.0093	13.14	0.66	0.511	0.025	0.40044	2689.8	23.7	2660.9	53.3	2711.5	44.8		2711.5	44.8	2689.1	23.8	1.9
DZ04_88	246	2.39		0.1973	0.0052	13.28	0.69	0.48	0.027	0.82091	2699.8	24.5	2527.3	58.8	2831.6	26.6		2831.6	26.6	2759.2	19	12
DZ04_111	379	1.568		0.3066	0.0095	30	1.7	0.694	0.033	0.86523	3486.8	27.8	3397.9	62.8	3538.3	21.9		3538.3	21.9	3525.5	20.5	4.8
MVDZ04, discordant analyses (excluded from plots and interpretation)
DZ04_54	250	0.857		0.0672	0.0037	0.568	0.036	0.0626	0.0031	0.86008	456.7	11.7	391.42	9.4	800.2	34.3		386.03	9.28	369.48	9.75	21
DZ04_83	167.7	0.865		0.0704	0.004	1.191	0.098	0.1179	0.0059	0.94412	796.4	22.7	718.5	17	1021.3	39.2		710	16.8	629.7	13.4	23
DZ04_46	562	0.644		0.0876	0.0045	1.403	0.094	0.1181	0.0062	0.70535	890.2	19.9	719.6	17.9	1341.8	46.2		700.2	17.4	738.4	19.6	30
DZ04_119	532	0.876		0.0915	0.0085	1.58	0.12	0.1277	0.0074	0.44563	962.4	23.6	774.7	21.2	1419.9	68.9		752.2	20.6	831.1	20.6	30
DZ04_27	231	0.873		0.0669	0.0044	0.811	0.068	0.0724	0.0033	0.30792	603	19.1	450.6	9.92	1227.3	80.7		436.8	9.62	462.05	9.93	37
DZ04_65	202	1.156		0.078	0.004	1.59	0.15	0.1406	0.0084	0.9632	966.3	29.4	848.1	23.7	1246	39.3		833.5	23.4	667.2	15.9	38
DZ04_25	351	1.22		0.152	0.0057	6.07	0.39	0.285	0.018	0.95288	1985.9	28	1616.5	45.1	2396	16.7		2351	65	2324.9	11.6	42
DZ04_29	235	0.807		0.094	0.01	1.61	0.21	0.117	0.0082	0.60287	974.1	40.8	713.3	23.7	1620.4	97.2		690.4	22.9	679.6	24.1	48
DZ04_63	569	1.084		0.1227	0.0036	3.98	0.19	0.2357	0.0099	0.99685	1630.1	19.4	1364.3	25.8	1992.49	6		1993	54	2074.14	2.15	48
DZ04_96	620	3.01		0.0978	0.0073	0.987	0.055	0.0761	0.0042	0.4862	697.2	14.1	472.8	12.6	1509.4	53.1		451.3	12	530.4	12.7	50
DZ04_115	185	0.973		0.105	0.018	1.29	0.29	0.0849	0.0054	0.88853	841.3	64.3	525.3	16	1803	155		492.2	15.1	457.52	8.77	69
DZ04_8	76.5	0.465		0.152	0.026	2.77	0.59	0.1273	0.0063	0.69329	1347.5	79.5	772.4	18	2432	154		709.7	16.6	704.7	14.3	93
DZ04_120	635	0.962		0.1118	0.0092	1.15	0.11	0.0611	0.0037	0.52474	777.2	26	382.3	11.2	2183.4	71.4		343.9	10.1	338.4	11.1	95
DZ04_13	649	1.584		0.1182	0.0097	2.38	0.29	0.139	0.012	0.91717	1236.6	43.6	839	34	2017.2	48.6		782.6	31.8	493.7	22.7	96
DZ04_89	78.1	0.674		0.155	0.02	1.92	0.27	0.0842	0.0042	0.60271	1088.1	46.9	521.1	12.5	2511.4	98.8		471.9	11.3	458.2	11	110
DZ04_102	32.6	0.895		0.215	0.031	7.8	1.5	0.252	0.019	0.79632	2208.2	86.5	1448.8	48.9	3013	112		2680	280	1188.6	37.5	110
DZ04_2	645	1.124		0.0999	0.0059	1.68	0.1	0.1203	0.0068	0.96727	1001	18.9	732.3	19.6	1647.8	14		699.7	18.7	187.4	10.9	160
DZ04_70	760	0.333		0.249	0.012	2.04	0.093	0.0584	0.0037	0.74933	1129	15.5	365.9	11.3	3205.8	33.2		275.84	8.55	72.5	10	230
DZ04_36	1265	0.776		0.152	0.068	0.58	0.55	0.0068	0.0053	0.98779	464	177	43.7	17	4552	156		21.38	8.32	8.83	2.83	300
DZ04_15	506	1.466		0.0538	0.0024	0.634	0.044	0.0856	0.0053	0.99045	498.6	13.7	529.5	15.7	359.2	13.3		532.2	15.8	423.4	10.1	-23
DZ04_99	197	0.822		0.0629	0.0032	1.348	0.083	0.1584	0.0086	0.48356	866.7	17.9	947.9	23.9	664.5	63.4		957.7	24.2	884.5	16.6	-13
DZ04_117	141	1.021		0.0622	0.0037	1.19	0.09	0.14	0.011	0.60009	796	20.9	844.7	31.1	661.9	73.9		850.2	31.3	799.2	20.5	-8.8
DZ04_14	51.1	1.242		0.1074	0.0054	4.77	0.26	0.337	0.017	0.6742	1779.6	22.9	1872.2	41	1672.7	39.3		1738	88	1768.7	22.4	-8.4
DZ04_58	117	2.17		0.0544	0.003	0.544	0.05	0.0759	0.0045	0.76424	441.1	16.4	471.6	13.5	284.6	68.9		474.2	13.6	466.9	13.1	-8.2
DZ04_105	191	1		0.0723	0.0034	1.83	0.11	0.185	0.012	0.7621	1056.3	19.7	1094.2	32.6	978.7	44.1		1099.5	32.8	1048.2	19.1	-5.8
DZ04_31	108	0.913		0.0525	0.0023	0.534	0.026	0.0731	0.0029	0.68612	434.46	8.6	454.81	8.71	328	40.8		456.5	8.74	443.91	7.83	-5.7
MVDZ03, Atushi Fm, Fluvial
DZ03_100	267	1.26		0.0555	0.0034	0.267	0.023	0.0354	0.0018	0.96421	240.29	9.22	224.26	5.6	400.1	44.2		223.13	5.58	206.89	3.26	12
DZ03_98	637	0.97		0.0546	0.0029	0.3	0.022	0.0419	0.0022	0.73486	266.4	8.59	264.6	6.81	282.3	56.9		264.51	6.8	264.77	6.79	0.77
DZ03_61	224	1.329		0.0529	0.0028	0.318	0.022	0.0428	0.0023	0.90621	280.36	8.47	270.17	7.11	366.3	34.5		269.42	7.09	266.56	7.1	4.6
DZ03_39	235	1.377		0.0509	0.0029	0.307	0.024	0.0426	0.0021	0.54989	271.85	9.32	268.93	6.49	297.1	74.8		268.72	6.49	269.34	6.4	1.2
DZ03_22	365	1.139		0.0605	0.0032	0.375	0.022	0.0439	0.0019	0.63748	323.35	8.12	276.96	5.87	672.5	48.8		273.5	5.79	279.94	5.94	18
DZ03_6	310	1.866		0.0566	0.0031	0.337	0.018	0.045	0.0021	0.77228	294.9	6.84	283.75	6.48	384.1	38.6		282.93	6.46	287.84	6.31	4.5
DZ03_50	362	1.137		0.0562	0.0029	0.345	0.017	0.0446	0.0018	0.45533	300.95	6.42	281.28	5.55	456.4	52.6		279.83	5.53	288.35	5.09	7.9
DZ03_37	664	1.418		0.0539	0.0019	0.342	0.017	0.0479	0.0024	0.81013	298.69	6.43	301.62	7.38	275.9	35.2		301.83	7.39	299.13	6.38	-1.3
DZ03_62	206	0.865		0.0522	0.0028	0.369	0.022	0.0505	0.0033	0.70165	318.91	8.16	317.6	10.1	328.6	55.1		317.5	10.1	318.7	8.08	0.56
DZ03_27	729	1.83		0.0597	0.0046	0.54	0.048	0.0631	0.0049	0.95399	438.4	15.8	394.5	14.9	676.4	29.5		390.9	14.7	360.5	17.1	17
DZ03_111	635	1.404		0.0548	0.0024	0.452	0.038	0.0603	0.0053	0.77799	378.7	13.3	377.4	16.1	386.2	64.5		377.4	16.1	378.6	13.3	0.45
DZ03_2	486	1.324		0.0576	0.0024	0.489	0.029	0.0622	0.0035	0.83545	404.23	9.89	389	10.6	492.3	36.7		387.8	10.6	399.61	9.94	5
DZ03_105	401	1.043		0.0569	0.0035	0.502	0.031	0.0655	0.0042	0.53957	413.1	10.5	409	12.7	435.8	67.3		408.7	12.7	411.84	9.94	1.3
DZ03_75	120.7	1.196		0.0551	0.0032	0.516	0.032	0.0667	0.0033	0.18829	422.5	10.7	416.24	9.97	456.6	79.5		415.73	9.96	419.07	7.97	1.8
DZ03_26	920	2.216		0.0561	0.0021	0.49	0.032	0.0631	0.0047	0.96915	404.9	10.9	394.5	14.2	465	21.7		393.6	14.2	421.02	8.23	7
DZ03_109	190	1.418		0.071	0.013	0.579	0.055	0.0664	0.0043	0.51219	463.8	17.7	414.4	13	716.4	88.3		410.3	12.9	423.3	12.8	14
DZ03_17	216	1.94		0.0554	0.0038	0.567	0.047	0.072	0.0042	0.99202	456.1	15.2	448.2	12.6	496	28.7		447.5	12.6	423.4	7.22	6.7
DZ03_67	311	1.359		0.0556	0.0026	0.56	0.043	0.0703	0.0038	0.94302	451.5	14	438	11.4	521.2	34.5		436.8	11.4	425.8	10.8	5.2
DZ03_86	118.5	1.297		0.0551	0.003	0.534	0.034	0.0684	0.0043	0.69241	434.5	11.3	426.5	13	476.8	54.9		425.9	13	432.2	11	2.4
DZ03_35	227	1.993		0.0583	0.003	0.547	0.033	0.0674	0.0037	0.84132	443	10.8	420.5	11.2	562	35.8		418.6	11.1	433.2	10.9	6.6
DZ03_88	111	0.612		0.059	0.0031	0.57	0.044	0.0698	0.0036	0.75796	458	14.2	435	10.8	575.4	55.3		433	10.8	434.4	11	6.4
DZ03_4	164.8	1.245		0.0565	0.0027	0.539	0.028	0.0694	0.0027	0.52368	437.76	9.24	432.54	8.14	465.3	50.7		432.11	8.13	434.45	7.52	1.5
DZ03_113	256	2.24		0.0571	0.0035	0.542	0.038	0.0686	0.0043	0.95478	439.7	12.5	427.7	13	503.2	23.4		426.7	12.9	438	13.2	3.8
DZ03_63	229	1.253		0.0538	0.0023	0.54	0.025	0.071	0.0023	0.77505	438.42	8.24	442.18	6.92	418.8	32.9		442.49	6.93	441.65	6.86	-1
DZ03_71	168	1.31		0.0561	0.0039	0.545	0.042	0.0711	0.0036	0.6359	441.7	13.8	442.8	10.8	436.2	66.2		442.9	10.8	442.6	10.6	-0.29
DZ03_58	379	1.303		0.0593	0.0037	0.621	0.045	0.0765	0.004	0.97568	490.5	14.1	475.2	12	562.5	26.5		473.9	11.9	446.6	10.2	8.3
DZ03_44	167.6	0.855		0.0591	0.0042	0.573	0.042	0.0696	0.0046	0.71664	460	13.6	433.7	13.9	593.1	57.3		431.6	13.8	447.3	13	7.4
DZ03_77	945	1.56		0.0539	0.0026	0.56	0.034	0.0733	0.0051	0.69797	451.5	11.1	456	15.3	428.8	57.2		456.4	15.3	451.7	11	-1.4
DZ03_15	199	1.048		0.0588	0.0029	0.601	0.049	0.0735	0.0048	0.93824	477.9	15.5	457.2	14.4	578.3	33		455.4	14.4	452	15.3	5.9
DZ03_118	258	2.43		0.0578	0.0031	0.587	0.041	0.0717	0.0045	0.74879	469	13.1	446.4	13.5	580.9	51.5		444.5	13.5	458.6	12.7	6.2
DZ03_73	309	1.362		0.0542	0.0028	0.58	0.045	0.0747	0.0048	0.99492	464.5	14.5	464.4	14.4	464.7	16.7		464.4	14.4	464.4	14.4	0.014
DZ03_85	180	1.195		0.0575	0.0022	0.592	0.032	0.0727	0.0037	0.7533	472.1	10.2	452.4	11.1	569.3	40.2		450.7	11.1	465.3	10.1	5.6
DZ03_18	200	1.088		0.0555	0.0035	0.597	0.041	0.0756	0.0043	0.77689	475.3	13	469.8	12.9	502.1	47.8		469.3	12.9	472.4	12.3	1.5
DZ03_45	660	1.425		0.0621	0.004	0.62	0.032	0.0744	0.0047	0.4184	489.8	10	462.6	14.1	619.3	67.6		460.3	14	483.46	9.64	7.7
DZ03_51	283	0.706		0.0595	0.0029	0.717	0.056	0.0826	0.0053	0.81686	548.9	16.6	511.6	15.8	706.7	47.9		508.3	15.7	522.8	16.1	8.8
DZ03_89	493	1.9		0.0612	0.0026	0.734	0.053	0.0837	0.0064	0.86819	558.9	15.5	518.2	19	728.4	40.7		514.5	18.9	565.9	16.1	12
DZ03_76	352	1.08		0.0683	0.0033	0.992	0.066	0.1023	0.0057	0.95058	699.7	16.8	627.9	16.7	938	22.5		620.7	16.5	587.5	23.3	18
DZ03_90	274	0.722		0.0603	0.0018	1.004	0.046	0.1146	0.0039	0.72072	705.8	11.7	699.4	11.3	726.4	33.7		698.7	11.3	702.2	10.7	1.2
DZ03_65	164.1	0.857		0.0626	0.0025	1.04	0.067	0.1187	0.007	0.95251	723.9	16.7	723.1	20.2	726.5	21		723	20.2	724.7	15.4	0.26
DZ03_69	141	0.684		0.0649	0.0029	1.064	0.062	0.1183	0.0072	0.52572	735.8	15.3	720.8	20.8	781.8	61		719.2	20.7	732.7	14.9	2.9
DZ03_117	211	0.483		0.0659	0.0033	1.085	0.065	0.117	0.0065	0.71902	746.1	15.8	713.3	18.8	845.8	45.2		709.8	18.7	738.6	16	6.3
DZ03_19	220	1.408		0.0737	0.0053	1.163	0.091	0.1181	0.0071	0.69168	783.4	21.4	719.6	20.5	969.5	58		712.8	20.3	743	20.2	11
DZ03_92	231	0.507		0.0673	0.0035	1.105	0.089	0.1233	0.0067	0.948	755.8	21.5	749.5	19.2	774.3	35.5		748.9	19.2	746.3	19.3	1.4
DZ03_102	101.2	0.65		0.0656	0.0036	1.094	0.082	0.122	0.0077	0.82695	750.4	19.9	742.1	22.1	775.5	44.3		741.2	22.1	748.7	19.9	1.6
DZ03_108	487	1.7		0.0675	0.0037	1.096	0.075	0.121	0.0098	0.52124	751.4	18.2	736.3	28.2	796.6	77.5		734.7	28.1	749.8	18.1	2.9
DZ03_82	254	1.238		0.0613	0.0021	1.117	0.059	0.1276	0.0068	0.82164	761.5	14.1	774.2	19.4	724.7	33.6		775.5	19.5	759	13.9	-2.7
DZ03_24	183	0.585		0.0629	0.0047	1.169	0.084	0.132	0.01	0.97324	786.2	19.7	799.3	28.5	749.2	18.5		800.7	28.5	766.9	12.8	-4.5
DZ03_99	36.4	1.469		0.07	0.0045	1.198	0.089	0.1246	0.0057	0.5418	799.7	20.6	757	16.3	920.5	64.4		752.3	16.2	766.9	16	7.5
DZ03_110	372	1.171		0.0679	0.0042	1.126	0.087	0.1265	0.0094	0.99815	765.8	20.8	767.9	26.9	759.95	5.77		768.1	26.9	767.87	5.28	-0.38
DZ03_79	127.1	0.98		0.0644	0.0027	1.142	0.061	0.1258	0.0061	0.78234	773.5	14.5	763.9	17.5	801.3	35.5		762.8	17.4	772.5	14.5	1.8
DZ03_60	256	0.661		0.0672	0.0029	1.207	0.078	0.1249	0.0067	0.85779	803.8	17.9	758.7	19.2	930.9	34.1		753.7	19.1	789	19.1	8
DZ03_101	235	1.212		0.0679	0.0034	1.2	0.1	0.1306	0.0079	0.78277	800.6	23.1	791.3	22.5	826.6	54.3		790.3	22.5	795.3	21.7	1.6
DZ03_120	117	1.064		0.0647	0.0022	1.204	0.071	0.1353	0.0063	0.92198	802.4	16.4	818	17.9	759.4	25.4		819.8	17.9	801.6	15.8	-3
DZ03_54	185	0.734		0.0726	0.0039	1.26	0.1	0.1233	0.0088	0.78442	827.9	22.5	749.5	25.3	1044.6	50.5		740.8	25	804.2	24.1	14
DZ03_72	128.9	0.92		0.0673	0.0038	1.227	0.069	0.1291	0.0066	0.69035	813	15.7	782.7	18.8	896.7	43.9		779.4	18.8	805.8	15.7	5.4
DZ03_53	257	1.61		0.0696	0.005	1.235	0.085	0.1346	0.0068	0.32217	816.6	19.3	814.1	19.3	823.6	74.2		813.8	19.3	815.3	15.7	0.43
DZ03_94	362	1.165		0.0712	0.0022	1.241	0.081	0.1285	0.007	0.91657	819.3	18.4	779.3	20	929.6	27.3		774.8	19.9	817.4	20.3	7.4
DZ03_13	63.7	0.854		0.0695	0.003	1.277	0.084	0.1337	0.0061	0.70978	835.5	18.7	808.9	17.3	906.9	47.7		805.9	17.3	818	16.9	4.4
DZ03_11	296	1.534		0.0669	0.0025	1.284	0.062	0.1401	0.0064	0.68867	838.6	13.8	845.2	18.1	821.2	38.8		846	18.1	839.3	13.7	-1.1
DZ03_87	200	0.906		0.0676	0.0035	1.314	0.077	0.1418	0.0074	0.75683	851.9	16.9	854.8	20.9	844.2	40.7		855.2	20.9	852.2	16.8	-0.51
DZ03_41	477	1.187		0.0686	0.0031	1.365	0.061	0.1473	0.0073	0.99647	874	13.1	885.8	20.5	844.26	6.53		887.2	20.5	853.7	3.13	-4
DZ03_93	182.1	1.882		0.0777	0.0031	1.317	0.086	0.1298	0.0088	0.79219	853.2	18.8	786.7	25.1	1030.2	43.4		779.1	24.9	858.1	19.6	12
DZ03_57	121.7	1.711		0.0675	0.004	1.303	0.093	0.1375	0.0091	0.97899	847	20.5	830.5	25.8	890.6	15.5		828.6	25.7	879.7	14.4	6.2
DZ03_34	165	1.156		0.0726	0.004	1.51	0.1	0.1516	0.0081	-0.11983	934.4	20.2	909.9	22.7	992.7	82.2		906.9	22.6	923.3	14.3	3.7
DZ03_1	605	1.503		0.0711	0.002	1.572	0.073	0.1621	0.0069	0.81956	959.2	14.4	968.4	19.1	938.1	27.7		969.6	19.2	957.8	14.2	-1.5
DZ03_40	556	1.579		0.07	0.0034	1.595	0.08	0.165	0.011	0.77869	968.3	15.7	984.5	30.4	931.6	43		986.6	30.5	963.5	14.4	-2.8
DZ03_52	1011	3.78		0.0784	0.0041	2.07	0.15	0.186	0.011	0.76196	1138.9	24.8	1099.7	29.9	1214.5	46.3		1093.9	29.8	1133	25.5	5.2
DZ03_84	398	1.377		0.0759	0.0026	2.11	0.11	0.199	0.011	0.94722	1152.1	18	1169.9	29.6	1118.6	17.7		1118.6	17.7	1135.2	12.6	-3.4
DZ03_43	296	1.906		0.0839	0.0044	2.25	0.15	0.2	0.011	0.79107	1196.8	23.4	1175.3	29.5	1235.8	40.1		1235.8	40.1	1196.6	23.8	2.8
DZ03_42	409	0.501		0.0943	0.004	2.54	0.12	0.1944	0.0094	0.73395	1283.6	17.2	1145.2	25.4	1523.4	32.9		1523.4	32.9	1293	18.1	18
DZ03_5	544	1.119		0.0866	0.0032	2.61	0.13	0.2185	0.0096	0.70162	1303.5	18.3	1273.9	25.4	1352.4	35.3		1352.4	35.3	1302.5	18.5	3.6
DZ03_7	502	1.49		0.084	0.0036	2.39	0.14	0.206	0.01	0.99082	1239.6	21	1207.5	26.7	1295.9	12		1295.9	12	1320.37	9.31	9.9
DZ03_55	525	3.03		0.1056	0.0046	4.46	0.29	0.306	0.019	0.80828	1723.6	27	1721	46.9	1726.7	36.2		1726.7	36.2	1724.4	25.1	0.26
DZ03_81	93.8	1.337		0.1085	0.0033	4.5	0.18	0.296	0.014	0.80927	1731	16.6	1671.4	34.8	1803.7	25.3		1803.7	25.3	1751.8	14.3	6.1
DZ03_20	165	1.091		0.1075	0.0052	4.76	0.31	0.317	0.018	0.79093	1777.9	27.3	1775.1	44.1	1781.2	36.7		1781.2	36.7	1778.6	26.3	0.27
DZ03_66	38.5	0.824		0.1083	0.0049	4.8	0.24	0.319	0.012	0.64978	1784.9	21	1784.8	29.3	1785	35		1785	35	1784.9	20.9	0.005
DZ03_70	370	2.49		0.109	0.0041	4.81	0.24	0.314	0.013	0.79922	1786.6	21	1760.4	31.9	1817.5	27.3		1817.5	27.3	1793.1	20.5	2.5
DZ03_91	62.4	1.524		0.118	0.0053	4.78	0.25	0.297	0.017	0.82144	1781.4	22	1676.4	42.2	1906.7	29.7		1906.7	29.7	1821.4	18.9	11
DZ03_78	109	0.873		0.1122	0.0041	5.11	0.22	0.323	0.015	0.82154	1837.8	18.3	1804.4	36.5	1875.8	24.3		1875.8	24.3	1850.3	15.8	3.2
DZ03_74	73.5	0.76		0.1243	0.0052	6.52	0.31	0.374	0.02	0.82278	2048.6	20.9	2048.2	46.9	2049	27		2049	27	2048.7	17.4	0.035
DZ03_3	245	1.14		0.1362	0.0052	6.83	0.3	0.36	0.018	0.76632	2089.6	19.5	1982.2	42.7	2197.2	28.3		2197.2	28.3	2119.6	17.2	9
DZ03_95	304	2.292		0.1407	0.0056	8.1	0.67	0.422	0.032	0.90627	2242.2	37.4	2269.6	72.5	2217.4	30.3		2217.4	30.3	2225.6	27.9	-2.4
DZ03_104	251	1.327		0.1614	0.0072	8.99	0.54	0.414	0.028	0.83814	2337	27.4	2233.2	63.8	2428.9	31.4		2428.9	31.4	2376.2	21.2	8
DZ03_68	27.7	0.559		0.1642	0.007	11.6	0.67	0.503	0.027	0.75308	2572.7	27	2626.7	57.9	2530.4	33		2530.4	33	2558.7	24.9	-3.6
DZ03_28	197	1.309		0.1719	0.0067	11.58	0.47	0.485	0.018	0.62254	2571.1	19	2549	39.1	2588.5	28.3		2588.5	28.3	2573.4	18.7	1.5
DZ03_29	119.3	0.822		0.187	0.011	13.38	0.88	0.511	0.028	0.54752	2706.8	31.1	2660.9	59.7	2741.3	47.8		2741.3	47.8	2707.7	31.3	3
DZ03_10	403	1.72		0.27	0.0099	24.7	1.4	0.649	0.035	0.83225	3296.4	27.7	3224.3	68.4	3340.6	25.1		3340.6	25.1	3321.9	21.4	4
MVDZ03, discordant analyses (excluded from plots and interpretation)
DZ03_33	860	0.99		0.0907	0.006	1.86	0.16	0.156	0.013	0.8312	1070	49	927	72	1410	130		916.8	35.6	1080.5	31.6	21
DZ03_9	363	0.939		0.0683	0.004	0.74	0.038	0.0751	0.0031	0.32017	559	22	466	19	820	120		458.29	9.13	498.72	8.46	23
DZ03_38	153	0.945		0.0812	0.0044	1.307	0.097	0.1183	0.0062	0.7157	846	41	725	36	1200	110		706.5	17.5	726	19.1	23
DZ03_59	228	3.12		0.0698	0.0031	1.262	0.082	0.1307	0.0066	0.98801	821	36	791	38	930	100		787.7	18.7	658	26.2	23
DZ03_32	675	2.51		0.1469	0.006	6.15	0.4	0.31	0.024	0.84555	1999	51	1698	99	2301	73		2301	73	2105.7	21.4	24
DZ03_47	273	1.17		0.1419	0.0074	6.17	0.37	0.313	0.021	0.97786	1984	54	1750	100	2248	86		2248	86	2199.67	7.97	26
DZ03_31	304	0.932		0.0831	0.004	1.313	0.062	0.1159	0.0062	0.70532	852	28	706	36	1266	95		690.9	17.5	833	14.9	27
DZ03_46	97	0.587		0.0718	0.0041	1.265	0.095	0.1279	0.0083	0.98729	819	41	774	48	950	120		769.8	23.5	996.7	12.6	27
DZ03_48	219	1.65		0.0686	0.0057	0.387	0.037	0.041	0.0025	0.49066	333	26	259	16	870	180		253.58	7.58	261.26	7.82	29
DZ03_83	194	1.59		0.0699	0.0061	0.658	0.081	0.0655	0.0026	0.68066	491	43	409	16	810	170		400.07	7.7	390.91	6.96	29
DZ03_106	200.3	2.52		0.1386	0.0044	5.34	0.31	0.278	0.017	0.79858	1877	46	1587	84	2196	56		2196	56	1971.1	22.8	29
DZ03_25	421	0.506		0.0989	0.0074	2.15	0.15	0.155	0.011	0.65834	1157	47	922	61	1570	140		895.8	29.7	1098.7	28.3	33
DZ03_80	235	0.846		0.0758	0.008	0.734	0.079	0.0685	0.0032	0.15513	554	45	427	19	1030	200		415.53	9.4	437.94	9.49	34
DZ03_112	370	2.263		0.0692	0.0032	0.632	0.039	0.0655	0.0046	0.94041	494	24	408	28	872	92		401.5	13.7	558.4	13.9	37
DZ03_12	773	1.57		0.0997	0.0093	1.803	0.089	0.134	0.011	0.39313	1045	33	807	61	1500	150		780.7	30.2	1024.7	16.8	38
DZ03_107	279	0.86		0.0801	0.0053	0.785	0.077	0.0696	0.0044	0.67893	577	43	433	27	1190	120		423.7	13	407.6	13.4	40
DZ03_16	1010	0.784		0.1068	0.0074	2.08	0.16	0.1447	0.0087	0.60966	1124	50	869	49	1720	120		834.3	23.5	915	26.9	41
DZ03_96	473	1.301		0.0786	0.0033	0.744	0.052	0.0687	0.0045	0.90356	559	30	428	27	1134	83		416.3	13.2	329	15	48
DZ03_115	958	1.195		0.0898	0.0047	0.536	0.038	0.044	0.0024	0.60365	432	25	277	15	1400	100		265.09	7.08	263.57	7.57	54
DZ03_21	1057	1.205		0.112	0.0076	1.77	0.12	0.1133	0.0059	0.35243	1037	45	691	34	1790	120		650.1	16.1	747.3	17.4	57
DZ03_36	321	1.266		0.076	0.004	1.49	0.1	0.1394	0.0069	0.99802	916	42	840	39	1077	97		831	19.3	507.44	3.88	61
DZ03_49	284	1.006		0.0791	0.0046	1.57	0.13	0.139	0.0088	0.97967	943	51	836	50	1150	100		824.4	24.5	517.3	15.2	62
DZ03_119	731	2.02		0.0716	0.0052	0.661	0.051	0.0663	0.0039	0.98499	509	32	413	24	930	140		405.1	11.5	239.15	4.96	66
DZ03_116	73.1	1.256		0.143	0.016	2.99	0.49	0.1427	0.0092	0.94422	1340	100	857	52	2170	160		774.5	23.5	654.2	10.9	95
DZ03_114	237	2.87		0.145	0.012	1.41	0.15	0.0745	0.0045	0.67353	875	58	463	27	2340	130		430.3	12.6	375.8	12.2	96
DZ03_56	1470	1.2		0.193	0.018	3.45	0.33	0.133	0.013	0.68993	1567	78	811	70	2680	150		688	31.9	552.7	41	120
DZ03_30	1185	0.998		0.122	0.0091	1.38	0.13	0.0936	0.0098	0.90908	860	52	558	48	1910	140		543.8	27.3	201.6	28.5	130
DZ03_103	850	4.76		0.1575	0.0084	2.81	0.26	0.136	0.012	0.84735	1363	68	816	70	2440	93		741	30.9	398.8	31.3	130
DZ03_97	1150	1.49		0.222	0.015	3.42	0.37	0.117	0.014	0.86856	1492	78	705	79	2980	110		585.9	33.5	124.4	29.5	230
DZ03_8	408	0.838		0.0978	0.0046	4.27	0.21	0.322	0.014	0.57606	1683	42	1797	66	1605	96		1605	96	1688.2	19.8	-10
DZ03_23	289	0.968		0.0641	0.0032	0.871	0.046	0.1117	0.0064	0.64553	632	25	681	37	700	110		687.2	18.7	637.3	12.3	-10
DZ03_64	364	1.24		0.0875	0.0035	3.33	0.25	0.27	0.02	0.96746	1480	61	1530	100	1373	78		1373	78	1432	17.4	-8.3
DZ03_14	190	1.666		0.0697	0.0041	1.68	0.12	0.176	0.012	0.72391	987	45	1052	64	880	120		880	120	998.7	22.4	-6.7
MVDZ02, Pakabulake Fm, Eolian
DZ02_51	135	2.11		0.0554	0.0047	0.263	0.02	0.0347	0.0015	0.1431	237.08	8.04	219.9	4.67	411	91.6		218.69	4.65	223.56	4.29	8.4
DZ02_85	641	2		0.0498	0.0024	0.258	0.017	0.0364	0.0017	0.8351	233.05	6.86	230.48	5.29	259.1	42.7		230.3	5.28	230.05	5.26	1.3
DZ02_12	373	1.754		0.052	0.0025	0.279	0.015	0.0382	0.0018	0.69752	249.86	5.95	241.67	5.59	327.6	45.1		241.08	5.58	244.84	5.33	3.9
DZ02_22	341	1.722		0.0519	0.0031	0.276	0.017	0.0394	0.002	0.59953	247.48	6.76	249.11	6.2	232	59.1		249.23	6.2	248.47	5.76	-0.76
DZ02_110	183	1.282		0.0546	0.0039	0.3	0.024	0.0393	0.002	0.44192	266.4	9.37	248.49	6.2	427	81.9		247.21	6.17	251.4	6.06	7.8
DZ02_41	253	1.104		0.0556	0.0021	0.308	0.018	0.0392	0.002	0.69206	272.63	6.99	247.87	6.2	491	48		246.09	6.16	254.92	6.1	11
DZ02_109	258	3.64		0.0527	0.0024	0.291	0.015	0.0403	0.0014	0.39482	259.35	5.9	254.69	4.34	301.6	56.4		254.36	4.33	255.9	4.07	2.1
DZ02_99	701	3.34		0.0538	0.0015	0.295	0.012	0.0401	0.0015	0.7746	262.49	4.7	253.45	4.65	343.9	29.9		252.8	4.64	257.63	4.45	4.1
DZ02_61	689	0.953		0.052	0.0016	0.292	0.013	0.0405	0.0019	0.71095	260.13	5.11	255.93	5.89	298.2	39.7		255.63	5.88	259.02	5	2.1
DZ02_81	304	1.385		0.0519	0.0026	0.292	0.016	0.0408	0.0021	0.72744	260.13	6.29	257.79	6.5	281.3	45		257.62	6.5	259.1	5.95	1.1
DZ02_91	550	2.886		0.0562	0.0018	0.312	0.012	0.0398	0.0013	0.5923	275.73	4.64	251.59	4.03	485.9	35.9		249.85	4	259.11	3.87	11
DZ02_111	564	2.261		0.0563	0.0032	0.31	0.02	0.0405	0.002	0.54705	274.18	7.75	255.93	6.2	433	62.2		254.61	6.16	260.52	5.98	7.8
DZ02_97	1332	2.708		0.0522	0.0017	0.3	0.014	0.0414	0.002	0.79352	266.4	5.47	261.5	6.19	309.7	34.8		261.15	6.18	265.36	5.44	2.4
DZ02_83	320	2.611		0.0526	0.0022	0.309	0.017	0.0422	0.0018	0.70045	273.41	6.59	266.46	5.57	333.3	44.8		265.95	5.56	267.99	5.48	2.9
DZ02_49	487	1.605		0.0576	0.0042	0.359	0.032	0.0428	0.0031	0.76461	311.5	12	270.17	9.58	633.4	62		267.11	9.48	270.57	9.83	16
DZ02_67	670	1.13		0.0568	0.0017	0.331	0.013	0.041	0.0016	0.8673	290.33	4.96	259.03	4.95	550.5	22		256.75	4.91	272.31	5.06	13
DZ02_26	324	1.74		0.055	0.0031	0.31	0.018	0.043	0.0022	0.57122	274.18	6.98	271.4	6.8	298	58.1		271.2	6.79	272.7	6.11	1.2
DZ02_118	653	2.27		0.0586	0.0028	0.367	0.024	0.0452	0.0027	0.73335	317.43	8.91	284.98	8.33	563	50.1		282.57	8.26	295.82	8.21	13
DZ02_33	464	1.887		0.0568	0.0028	0.345	0.02	0.0462	0.0029	0.69781	300.95	7.55	291.15	8.93	377.7	53		290.42	8.91	298.63	7.44	4.3
DZ02_35	168	1.17		0.0556	0.003	0.347	0.022	0.047	0.0026	0.67834	302.46	8.29	296.08	8	352	54.4		295.6	7.99	298.88	7.49	2.5
DZ02_88	326	4.19		0.0583	0.0034	0.362	0.022	0.0475	0.0021	0.54014	313.71	8.2	299.15	6.46	423.3	58.5		298.07	6.44	302.71	6.24	5.5
DZ02_6	562	1.45		0.0556	0.0018	0.367	0.02	0.0495	0.0028	0.90573	317.43	7.43	311.45	8.6	361.5	27.3		311	8.59	318.62	7.46	3
DZ02_47	293	1.52		0.0524	0.0024	0.384	0.028	0.0513	0.0025	0.70663	330	10.3	322.5	7.66	383.1	58.1		322.09	7.66	322.88	7.68	2.7
DZ02_70	157	1.033		0.0554	0.0029	0.442	0.031	0.056	0.0018	0.73246	371.7	10.9	351.25	5.49	501	56.7		349.66	5.47	346.55	5.2	7.1
DZ02_21	152.3	2.1		0.0631	0.0027	0.527	0.026	0.0607	0.0025	0.16217	429.82	8.64	379.88	7.6	707.2	62.7		375.83	7.52	400.29	6.25	15
DZ02_108	301	2.12		0.0579	0.0029	0.51	0.025	0.0622	0.0026	0.53446	418.45	8.41	388.99	7.89	584.2	48.1		386.61	7.84	401.2	7.23	8.9
DZ02_24	240	2.19		0.0575	0.0021	0.502	0.016	0.0623	0.0021	0.4992	413.06	5.41	389.6	6.37	546.3	35.9		387.71	6.34	404.88	5.07	7.5
DZ02_103	306	2.238		0.0574	0.002	0.518	0.022	0.0627	0.0026	0.65656	423.81	7.36	392.02	7.89	600.6	37.7		389.44	7.84	410.44	7.07	9.9
DZ02_93	251	6.05		0.0568	0.002	0.501	0.018	0.0657	0.0022	0.45561	412.38	6.09	410.2	6.65	424.6	40.5		410.02	6.65	411.46	5.42	0.67
DZ02_79	234	1.034		0.0557	0.0028	0.504	0.022	0.0658	0.0025	0.12148	414.41	7.43	410.8	7.56	434.5	60.4		410.51	7.56	412.64	5.62	1.1
DZ02_75	437	2.16		0.055	0.0017	0.514	0.019	0.0664	0.0016	0.85013	421.14	6.37	414.43	4.84	458	23.1		413.88	4.83	412.71	4.78	2.1
DZ02_107	558	2.51		0.0591	0.0025	0.54	0.036	0.0662	0.0035	0.74681	438.4	11.9	413.2	10.6	573	48.3		411.1	10.5	419.4	10.6	7.1
DZ02_95	98.6	2.237		0.0551	0.0022	0.509	0.025	0.0674	0.0019	0.47995	417.78	8.41	420.47	5.74	402.9	48.5		420.69	5.74	420.01	5.59	-0.77
DZ02_57	374	0.707		0.0643	0.0075	0.573	0.057	0.0655	0.0046	0.077519	460	18.4	409	13.9	723	124		404.8	13.8	426.3	11.7	14
DZ02_90	197	2.14		0.0622	0.0031	0.569	0.029	0.068	0.0016	0.17534	457.37	9.38	424.1	4.83	628.2	56.3		421.32	4.8	429.18	4.6	9.2
DZ02_60	286	1.024		0.0578	0.0025	0.583	0.042	0.0688	0.0039	0.78121	466.4	13.5	428.9	11.8	655.3	48.2		425.8	11.7	434.1	12	10
DZ02_72	142	1.547		0.0546	0.0021	0.538	0.027	0.0699	0.0026	0.78626	437.11	8.91	435.55	7.83	445.3	34.6		435.42	7.83	435.87	7.76	0.43
DZ02_80	91	1.661		0.0631	0.0052	0.657	0.074	0.072	0.0029	0.59253	512.8	22.7	448.19	8.72	812.1	98.8		442.62	8.61	440.18	8.42	17
DZ02_66	188.6	1.857		0.0568	0.0023	0.56	0.024	0.0704	0.0021	0.34453	451.53	7.81	438.57	6.32	518.1	47.2		437.48	6.31	442.94	5.69	3.6
DZ02_40	873	2.25		0.0629	0.0033	0.601	0.051	0.0702	0.0052	0.87453	477.9	16.2	437.4	15.7	677.3	44		433.9	15.5	447.6	16.6	11
DZ02_17	129.4	1.431		0.0566	0.0037	0.56	0.037	0.0717	0.0033	0.49807	451.5	12	446.39	9.92	477.8	65		445.96	9.92	447.98	9.31	1.4
DZ02_74	355	1.408		0.056	0.0021	0.556	0.022	0.0719	0.0022	0.57581	448.92	7.18	447.59	6.62	455.7	36.9		447.48	6.61	448.13	6.1	0.36
DZ02_58	390	1.857		0.0615	0.0037	0.601	0.04	0.0698	0.0038	0.57745	477.9	12.7	435	11.4	689.5	60.4		431.3	11.4	450	10.9	12
DZ02_4	264	1.508		0.057	0.0025	0.563	0.03	0.0723	0.003	0.41969	453.48	9.74	450	9.02	471.2	57.6		449.71	9.01	451.5	7.89	0.95
DZ02_34	118.8	1.578		0.0576	0.0028	0.564	0.035	0.0735	0.0038	0.51485	454.1	11.4	457.2	11.4	438.6	63.1		457.5	11.4	455.65	9.89	-0.85
DZ02_92	207	2.38		0.0597	0.002	0.583	0.022	0.0726	0.0024	0.65177	466.39	7.06	451.8	7.21	538.8	32.6		450.57	7.19	459.4	6.55	4
DZ02_2	482	1.042		0.0571	0.0025	0.51	0.027	0.0632	0.004	0.97914	418.45	9.08	395.1	12.1	549.5	17.2		393.2	12.1	461.01	5.55	16
DZ02_45	96.6	1.179		0.0582	0.0035	0.592	0.039	0.0733	0.0038	0.57319	472.1	12.4	456	11.4	551.4	60.9		454.6	11.4	462.3	10.6	4.3
DZ02_8	287	1.136		0.0596	0.0022	0.626	0.036	0.0785	0.0043	0.75815	493.6	11.2	487.2	12.9	523.6	42.9		486.6	12.8	492.1	11.1	1.8
DZ02_52	334	5.41		0.0674	0.0055	0.709	0.042	0.0764	0.0034	-0.10687	544.2	12.5	474.6	10.2	847.2	80.9		468.4	10.1	502.07	7.61	17
DZ02_44	61.6	0.602		0.0639	0.0045	0.788	0.065	0.0919	0.0063	0.72639	590	18.5	566.8	18.6	680.6	61.3		564.6	18.5	578.2	17.6	5.2
DZ02_15	84.6	1.137		0.0672	0.0035	0.954	0.066	0.0991	0.0046	0.66864	680.2	17.1	609.1	13.5	923	52.9		602.1	13.3	615.8	13.8	15
DZ02_25	105.8	0.756		0.0643	0.0025	0.942	0.032	0.1047	0.0028	0.39436	673.93	8.37	641.89	8.17	782.5	35.7		638.71	8.13	656.86	7	6.4
DZ02_14	52	0.607		0.0725	0.0043	1.1	0.079	0.1093	0.0057	0.68398	753.4	19.1	668.7	16.6	1013.7	53.2		659.8	16.4	684.7	17	16
DZ02_96	101.3	1.903		0.0693	0.0026	1.098	0.043	0.113	0.003	0.41413	752.4	10.4	690.15	8.69	942.2	38		683.61	8.61	710.01	8.1	12
DZ02_100	97.1	0.982		0.068	0.0035	1.073	0.067	0.1151	0.0054	0.63334	740.2	16.4	702.3	15.6	856.7	50.8		698.3	15.5	717.5	14.8	7
DZ02_38	49	1.223		0.065	0.0037	1.032	0.063	0.1175	0.0054	0.37044	719.9	15.7	716.2	15.6	731.7	65		715.8	15.6	718	13	0.7
DZ02_82	273	1.534		0.063	0.0032	1.037	0.049	0.1185	0.0049	0.46697	722.4	12.2	721.9	14.1	724	48.8		721.9	14.1	722.2	11.1	0.094
DZ02_106	224	1.834		0.0648	0.0025	1.059	0.064	0.1159	0.006	0.79431	733.3	15.8	706.9	17.3	814.9	38.6		704.2	17.3	725.4	15.9	5
DZ02_113	339	3.2		0.0672	0.0025	1.059	0.049	0.1142	0.0055	0.61182	733.3	12.1	697.1	15.9	845.7	43.3		693.3	15.8	726.7	12.1	7.2
DZ02_104	231	1.099		0.0684	0.0032	1.062	0.063	0.1193	0.0056	0.56139	734.8	15.5	726.5	16.1	760.1	53.7		725.7	16.1	731	14	1.5
DZ02_46	85.5	0.596		0.0665	0.003	1.107	0.066	0.1202	0.0059	0.80484	756.7	15.9	731.7	17	831.4	36.9		729	16.9	747.7	16	4.6
DZ02_9	107.9	0.773		0.066	0.0029	1.129	0.052	0.1234	0.0047	0.631	767.3	12.4	750.1	13.5	817.6	38.5		748.3	13.5	760.5	11.8	3.1
DZ02_78	150	1.141		0.062	0.0026	1.108	0.063	0.126	0.0052	0.63617	757.2	15.2	765	14.9	734.3	46.8		765.8	14.9	761.3	13.5	-1.4
DZ02_94	144.7	1.171		0.0735	0.0029	1.224	0.053	0.1223	0.0032	0.36336	811.6	12.1	743.79	9.19	1002.4	42.3		736.32	9.1	761.7	8.67	12
DZ02_42	350	0.821		0.0764	0.0023	1.28	0.062	0.1222	0.0048	0.84447	836.9	13.8	743.2	13.8	1094.3	26		732.8	13.6	769.4	15.4	16
DZ02_10	77.2	0.659		0.0658	0.0027	1.169	0.071	0.1251	0.0056	0.66548	786.2	16.6	759.9	16	861.6	47.2		757	16	771	15.2	4.6
DZ02_64	74.9	0.598		0.071	0.0032	1.249	0.063	0.1247	0.0045	0.46574	823	14.2	757.6	12.9	1004	47.1		750.3	12.8	782	11.9	11
DZ02_55	301	1.334		0.072	0.004	1.181	0.072	0.1205	0.008	0.59762	791.8	16.8	733.4	23	959.8	58.6		727.1	22.8	782.5	17	11
DZ02_84	139	1.459		0.0639	0.0031	1.205	0.072	0.1354	0.0075	0.96073	802.9	16.6	818.6	21.3	759.6	17.6		820.4	21.3	783.2	14	-4.8
DZ02_37	78.2	2.056		0.0717	0.0035	1.222	0.072	0.123	0.0062	0.62032	810.7	16.5	747.8	17.8	987.5	49.1		740.9	17.6	783.3	16	11
DZ02_69	111.6	0.957		0.0667	0.002	1.25	0.044	0.1316	0.0039	0.51688	823.4	9.93	797	11.1	895.4	33.3		794	11.1	812.94	9.21	4.5
DZ02_3	147	1.365		0.0699	0.0023	1.289	0.064	0.1323	0.0053	0.66188	840.9	14.2	801	15.1	947.7	38.8		796.4	15	823.4	13.7	6.7
DZ02_39	173	1.229		0.0678	0.0042	1.342	0.084	0.143	0.007	0.3987	864.1	18.2	861.6	19.7	870.5	64.5		861.3	19.7	863	15.8	0.4
DZ02_31	136	0.83		0.0797	0.0036	1.48	0.092	0.1339	0.0069	0.61872	922.2	18.8	810.1	19.6	1201	49.8		796.7	19.3	863.3	18.7	18
DZ02_73	100.6	1.954		0.0676	0.0021	1.363	0.055	0.1434	0.0047	0.82141	873.2	11.8	863.9	13.2	896.8	23.7		862.8	13.2	871.3	11.9	1.5
DZ02_53	120	1.357		0.074	0.0033	1.52	0.11	0.152	0.011	0.87979	938.5	22.2	912.2	30.8	1000.8	36		908.9	30.7	950.8	21.1	5.1
DZ02_29	301	4.23		0.0741	0.0043	1.6	0.11	0.1579	0.0079	0.55252	970.2	21.5	945.1	22	1027.5	59.2		941.9	21.9	958	19.4	3.7
DZ02_18	445	5.23		0.0721	0.0029	1.58	0.1	0.1602	0.0095	0.75414	962.4	19.7	957.9	26.4	972.6	44		957.3	26.4	962.4	19.7	0.71
DZ02_11	189	2.6		0.0758	0.0033	1.72	0.1	0.1646	0.0084	0.6388	1016	18.7	982.3	23.2	1089.5	46.9		977.8	23.2	1008.4	18.6	4.9
DZ02_105	370	2.52		0.0747	0.0028	1.728	0.092	0.1678	0.0061	0.64514	1019	17.1	1000	16.8	1060.1	41		997.5	16.8	1008.8	15.6	2.7
DZ02_117	304	1.48		0.0767	0.0033	1.743	0.071	0.1643	0.0061	0.46295	1024.6	13.1	980.6	16.9	1119.7	40.4		974.8	16.8	1011.9	12.6	6.3
DZ02_50	67.1	2.4		0.0736	0.0047	1.71	0.14	0.164	0.011	0.94068	1012.3	26.2	979	30.5	1085.1	29.6		974.6	30.3	1033.2	27	6.4
DZ02_65	174	1.227		0.0863	0.0026	2.36	0.11	0.1948	0.0078	0.7835	1230.6	16.6	1147.3	21	1379.6	28		1379.6	28	1227.4	17.7	11
DZ02_43	403	1.56		0.087	0.0049	2.62	0.3	0.221	0.021	0.82831	1306.3	42.1	1287.2	55.4	1337.8	62		1337.8	62	1309.4	42.2	2.4
DZ02_89	262	2.21		0.1084	0.0042	4.34	0.23	0.295	0.014	0.63192	1701	21.9	1666.5	34.8	1743.8	39.7		1743.8	39.7	1701	22.1	3.3
DZ02_101	216.6	3.78		0.1194	0.0038	5	0.22	0.305	0.013	0.65847	1819.3	18.6	1716.1	32.1	1939.7	32		1939.7	32	1827	18.9	9.5
DZ02_114	350	6.48		0.1106	0.0041	5.06	0.3	0.331	0.015	0.69658	1829.4	25.1	1843.2	36.3	1813.8	38.8		1813.8	38.8	1829.3	25	-1.2
DZ02_76	37.3	1.128		0.1113	0.004	5.2	0.24	0.334	0.011	0.61828	1852.6	19.7	1857.7	26.6	1846.9	33		1846.9	33	1853.3	19.4	-0.45
DZ02_68	65.2	0.507		0.1178	0.0028	6.04	0.24	0.3572	0.0095	0.80729	1981.6	17.3	1968.9	22.6	1995	21.4		1995	21.4	1982.7	17.4	1.1
DZ02_56	1292	13.5		0.1335	0.007	7.38	0.43	0.373	0.019	0.64176	2158.5	26.1	2043.5	44.6	2269.8	40.2		2269.8	40.2	2164.3	26.6	9.1	high U/Th
DZ02_119	172	1.436		0.1532	0.0076	9.63	0.72	0.438	0.025	0.63355	2400	34.4	2341.7	56	2449.9	49.6		2449.9	49.6	2400.9	34.9	4.2
DZ02_19	254	0.582		0.176	0.007	9.71	0.52	0.395	0.021	0.73119	2407.7	24.6	2146	48.5	2637	32.5		2637	32.5	2465.9	23.2	19
DZ02_32	199	1.39		0.1628	0.0075	10.57	0.6	0.476	0.022	0.70233	2486.1	26.3	2509.8	48	2466.7	34.5		2466.7	34.5	2482.3	25.7	-1.6
DZ02_30	408	1.89		0.1807	0.0081	10.98	0.57	0.45	0.027	0.64794	2521.4	24.2	2395.3	60	2624.6	39.5		2624.6	39.5	2540.8	22.8	8.7
DZ02_112	98.3	3.26		0.1765	0.0094	11.65	0.63	0.471	0.022	0.44803	2576.7	25.3	2487.9	48.2	2647.3	44.2		2647.3	44.2	2571.7	25.6	6.1
DZ02_16	180	2.735		0.1783	0.0065	11.77	0.63	0.458	0.021	0.77503	2586.3	25	2430.7	46.4	2710.5	28.1		2710.5	28.1	2630.5	23.2	11
MVDZ02, discordant analyses (excluded from plots and interpretation)
DZ02_115	831	5.52		0.1249	0.0055	4.64	0.22	0.269	0.012	0.57659	1755	40	1542	58	2034	77		2034	77	1732.8	21.5	21
DZ02_28	156	1.36		0.0836	0.0056	1.31	0.085	0.1181	0.0096	0.67978	859	33	716	55	1210	140		705.1	27.1	848.5	19.7	25
DZ02_116	277	1.908		0.1781	0.0085	8.95	0.46	0.365	0.025	0.70691	2326	47	2010	120	2657	73		2657	73	2400.6	20.7	25
DZ02_77	63	1.352		0.094	0.012	1.92	0.28	0.151	0.0075	0.7089	1035	85	904	41	1350	210		882.3	20.5	865.1	19.1	31
DZ02_102	145.3	1.548		0.0721	0.0053	0.676	0.055	0.0647	0.0031	0.23523	517	32	404	19	900	140		393.84	9.15	421.21	9.13	32
DZ02_1	226	0.919		0.0837	0.0041	1.43	0.12	0.1207	0.0057	0.75529	887	47	733	32	1255	94		715.4	16	687.6	16.3	33
DZ02_7	516	7.32		0.185	0.0067	8.98	0.46	0.342	0.019	0.7511	2327	49	1887	90	2698	61		2698	61	2448.3	21.3	35
DZ02_63	206	1.135		0.068	0.0053	0.778	0.093	0.0703	0.0029	0.82442	557	46	438	18	800	140		424.89	8.48	398.09	6.34	40
DZ02_23	335	7.45		0.0727	0.0039	1.22	0.11	0.1164	0.0095	0.97824	791	48	706	54	990	100		698.9	27	1052.8	16.4	42
DZ02_13	280	5		0.0733	0.0059	1.02	0.16	0.0877	0.007	0.90363	669	75	540	41	950	170		525	20.1	445.3	13.9	46
DZ02_71	150	0.962		0.0858	0.0074	0.93	0.1	0.0757	0.0027	0.64966	655	54	470	16	1200	170		451.83	7.78	440.29	7.23	47
DZ02_54	88	0.83		0.103	0.024	0.376	0.063	0.0325	0.0051	0.19058	313	45	205	32	1170	430		197.6	15.3	234.9	14.7	52
DZ02_98	80.8	2		0.089	0.011	0.85	0.12	0.0659	0.0028	0.29148	598	62	411	17	1260	240		392.1	8.08	406.91	8.48	53
DZ02_86	196	0.564		0.105	0.015	1.94	0.34	0.124	0.0082	0.50015	1040	110	751	46	1490	240		721.2	22.6	721.2	23.3	58
DZ02_62	357	1.2		0.118	0.026	1.6	0.55	0.0829	0.0085	0.75786	770	150	511	49	1480	350		462.2	22.9	446.6	18.7	93
DZ02_20	132	1.75		0.126	0.019	1.34	0.24	0.0712	0.0056	0.69784	790	100	442	33	1720	300		399.8	15.2	369.9	14.1	95
DZ02_27	164	1.11		0.124	0.019	1.49	0.29	0.0759	0.006	0.90454	810	100	470	35	1710	300		422.4	16.2	355.58	9.28	100
DZ02_5	284	2.425		0.153	0.027	4.6	1.2	0.173	0.018	0.89858	1450	180	991	86	2030	310		884.7	43	780.8	27	110
DZ02_59	940	9.46		0.199	0.026	1.31	0.12	0.0516	0.0049	0.19216	838	49	324	30	2670	200		271.9	12.6	361.6	15.3	120
DZ02_87	501	1.557		0.0499	0.0025	0.277	0.018	0.0412	0.0033	0.8021	244	13	260	20	180	100		261.1	10.2	245.95	7.03	-7.4
DZ02_48	388	2.385		0.0491	0.0025	0.175	0.011	0.0271	0.0018	0.74844	162.9	9.5	172	11	160	100		172.95	5.67	165.22	4.68	-6.8
DZ02_36	220	1.575		0.0678	0.0036	1.269	0.072	0.1436	0.0094	0.71718	837	35	862	53	850	110		868.8	26.6	827.5	15.8	-6.2
MVDZ01, Pakabulake Fm, Eolian
DZ01_118	1295	0.62		0.0485	0.0033	0.0402	0.0027	0.00612	0.00033	0.3274	40.02	1.32	39.33	1.06	81.4	84.3		39.29	1.06	39.57	0.94	1.9
DZ01_25	192	1.71		0.0497	0.0028	0.197	0.011	0.0286	0.001	0.26181	182.58	4.67	181.78	3.13	193	67		181.73	3.13	181.98	2.88	0.49
DZ01_42	420	0.489		0.0605	0.0039	0.274	0.021	0.0326	0.0014	0.38548	245.89	8.37	206.8	4.37	637.8	77.4		204.06	4.31	209.53	4.35	19
DZ01_21	1080	16.7		0.0492	0.002	0.262	0.052	0.0352	0.0056	0.9277	236.3	20.9	223	17.4	370.3	88.1		222.1	17.4	215	17.1	7.8	high U/Th
DZ01_115	748	0.582		0.0509	0.0027	0.243	0.012	0.0344	0.0014	0.20221	220.87	4.9	218.03	4.36	251.3	65.9		217.83	4.36	219.24	3.57	1.5
DZ01_96	292	0.707		0.0507	0.0026	0.244	0.015	0.0348	0.002	0.63708	221.69	6.12	220.52	6.23	234.1	58.6		220.44	6.23	221.13	5.59	0.63
DZ01_13	658	1.75		0.0557	0.0021	0.279	0.011	0.0382	0.0018	0.31585	249.86	4.37	241.67	5.59	327.6	57.9		241.08	5.58	247.18	3.93	4.2
DZ01_3	685	1.9		0.059	0.0033	0.301	0.017	0.0369	0.0019	0.2985	267.18	6.63	233.59	5.91	573	69.7		231.19	5.85	247.2	5.09	16
DZ01_19	272	1.014		0.0507	0.0022	0.283	0.014	0.0416	0.0017	0.47869	253.03	5.54	262.74	5.26	164	54.6		263.44	5.27	258.32	4.61	-4.4
DZ01_86	83.9	1.24		0.049	0.0032	0.288	0.019	0.0422	0.0019	0.30496	256.98	7.49	266.46	5.88	171.4	78.9		267.14	5.89	263.29	5.23	-4.2
DZ01_38	213	0.89		0.0629	0.0062	0.361	0.042	0.0423	0.0027	0.56475	313	15.7	267.07	8.35	671	103		264.65	8.28	265.11	8.39	18
DZ01_101	483	4.07		0.0501	0.0025	0.296	0.021	0.0423	0.0026	0.73272	263.27	8.23	267.07	8.04	229.6	56.8		267.35	8.05	265.32	7.54	-1.7
DZ01_92	205	1.26		0.0577	0.0049	0.333	0.04	0.0415	0.0035	0.57384	291.9	15.2	262.1	10.8	537	109		260	10.7	265.7	10.8	12
DZ01_47	70.5	0.766		0.0524	0.0039	0.319	0.025	0.0434	0.002	0.42727	281.13	9.62	273.87	6.18	342	81.5		273.34	6.17	275.01	6.02	3
DZ01_60	245	1.66		0.0531	0.0029	0.326	0.019	0.044	0.0018	0.41556	286.51	7.27	277.58	5.56	360	62.7		276.93	5.54	280.05	5.21	3.6
DZ01_104	344	1.13		0.0589	0.0051	0.388	0.054	0.0469	0.0027	0.83834	332.9	19.8	295.46	8.31	604	104		292.64	8.24	281.56	6.52	15
DZ01_108	269	1.44		0.0535	0.0029	0.342	0.017	0.0469	0.0028	0.61029	298.69	6.43	295.46	8.62	324	55.8		295.22	8.61	298.18	6.35	1.5
DZ01_49	66	0.684		0.0578	0.0038	0.361	0.024	0.0467	0.0021	0.23359	312.96	8.95	294.23	6.47	454.9	78.8		292.83	6.44	299.69	5.81	7.2
DZ01_73	133	1.39		0.0553	0.0026	0.361	0.014	0.0459	0.0019	0.37277	312.96	5.22	289.3	5.86	493.1	49.6		287.54	5.82	303.09	4.6	9.7
DZ01_94	470	1.065		0.0575	0.003	0.373	0.022	0.0476	0.0022	0.62774	321.87	8.13	299.77	6.77	485.1	51.7		298.11	6.73	305.16	6.63	8.2
DZ01_34	317	2.07		0.053	0.0031	0.352	0.02	0.0484	0.002	0.34111	306.22	7.51	304.69	6.15	317.9	65.6		304.58	6.15	305.23	5.49	0.59
DZ01_64	172	1.09		0.0521	0.0031	0.346	0.017	0.0491	0.0019	0.10689	301.71	6.41	308.99	5.84	245.7	68.2		309.54	5.85	305.72	4.53	-2.8
DZ01_58	468	2.53		0.0527	0.0025	0.362	0.017	0.0496	0.0014	0.53321	313.71	6.34	312.07	4.3	325.9	45.2		311.94	4.3	312.28	4.24	0.6
DZ01_4	161.1	2.98		0.0588	0.004	0.42	0.037	0.0531	0.0027	0.45409	356.1	13.2	333.53	8.26	505.6	87.2		331.79	8.22	336.22	8.17	7.6
DZ01_57	353	2.07		0.057	0.0026	0.414	0.02	0.0527	0.0025	0.51108	351.75	7.18	331.08	7.65	490.6	52.2		329.49	7.62	342.56	6.5	7.5
DZ01_29	102.6	1.426		0.0556	0.0042	0.418	0.026	0.0547	0.0022	0.19604	354.62	9.31	343.31	6.72	429.3	74.8		342.44	6.71	346.74	5.95	3.8
DZ01_17	365	1.014		0.0568	0.0022	0.417	0.02	0.0548	0.0027	0.60047	353.9	7.17	343.92	8.25	419.9	48.5		343.15	8.23	350.59	6.83	3.7
DZ01_56	484	1.86		0.0554	0.0024	0.466	0.02	0.062	0.0029	0.56295	388.42	6.93	387.78	8.8	392.3	47.2		387.73	8.8	388.27	6.69	0.22
DZ01_62	159	1.192		0.0566	0.0024	0.479	0.02	0.061	0.0028	0.54684	397.39	6.87	381.7	8.51	489.7	46.2		380.45	8.48	393.02	6.61	5.3
DZ01_41	302	2.16		0.0551	0.0021	0.484	0.025	0.0631	0.003	0.68096	400.81	8.55	394.45	9.1	437.7	44.3		393.94	9.08	398.21	8.1	2
DZ01_82	549	1.41		0.0556	0.0029	0.48	0.027	0.0644	0.0041	0.57482	398.07	9.26	402.3	12.4	373.4	62.7		402.7	12.4	398.85	9.05	-1.4
DZ01_23	155	1.009		0.0566	0.0023	0.489	0.021	0.0631	0.0026	0.57994	404.23	7.16	394.45	7.88	460.5	42.8		393.66	7.87	400.4	6.68	3.1
DZ01_72	589	1.83		0.055	0.0025	0.483	0.024	0.0642	0.0023	0.46108	400.13	8.22	401.12	6.97	394.4	51.5		401.2	6.97	400.77	6.38	-0.3
DZ01_98	575	2.21		0.0556	0.0033	0.494	0.03	0.0645	0.0033	0.45731	407.6	10.2	402.93	9.99	434.3	65.5		402.55	9.98	405.19	8.63	1.4
DZ01_83	113	1.35		0.056	0.003	0.498	0.03	0.064	0.004	0.43315	410.3	10.2	399.9	12.1	469.5	72.4		399.1	12.1	406.67	9.31	3.3
DZ01_87	381	2.31		0.0558	0.0032	0.5	0.03	0.0644	0.0033	0.42176	411.7	10.2	402.33	9.99	464.6	66.8		401.57	9.97	406.85	8.53	2.8
DZ01_110	388	1.58		0.0556	0.0025	0.498	0.029	0.0667	0.0037	0.74111	410.35	9.83	416.2	11.2	377.3	46.1		416.7	11.2	411.85	9.58	-1.9
DZ01_67	79.7	1.43		0.0584	0.0031	0.525	0.031	0.0664	0.003	0.51755	428.5	10.3	414.43	9.07	504.8	57.9		413.28	9.04	419.48	8.41	4
DZ01_81	138	1.355		0.0554	0.0032	0.518	0.02	0.0678	0.0024	0.13682	423.81	6.69	422.89	7.24	428.9	54.3		422.81	7.24	423.39	5.24	0.27
DZ01_117	261	11.16		0.0548	0.0021	0.521	0.025	0.0678	0.0028	0.66737	425.82	8.34	422.89	8.45	441.7	41.1		422.65	8.45	424.4	7.68	0.86
DZ01_71	172.3	1.476		0.0544	0.0028	0.521	0.026	0.0691	0.0021	0.36682	425.82	8.68	430.73	6.33	399.3	53.8		431.14	6.34	429.42	5.89	-1.4
DZ01_40	760	0.85		0.0562	0.0031	0.536	0.04	0.0702	0.0044	0.69496	435.8	13.2	437.4	13.3	427.5	61		437.5	13.3	436.6	12.2	-0.45
DZ01_24	450	0.985		0.0545	0.0025	0.53	0.022	0.0719	0.0026	0.31532	431.81	7.3	447.59	7.82	348.5	51.6		448.9	7.84	438.83	6.08	-4.5
DZ01_102	212	4.02		0.0558	0.0032	0.546	0.027	0.0712	0.0033	0.35686	442.37	8.87	443.38	9.93	437.1	60.5		443.47	9.93	442.79	7.69	-0.29
DZ01_79	239	1.285		0.0683	0.0061	0.672	0.064	0.0719	0.0028	0.47094	521.9	19.4	447.59	8.42	862	87.4		442.92	8.33	444.85	8.45	19
DZ01_59	133.3	1.114		0.0563	0.0033	0.549	0.03	0.0718	0.003	0.19636	444.34	9.83	446.99	9.02	430.6	69		447.21	9.03	445.81	7.26	-0.73
DZ01_105	138	1.8		0.0551	0.0033	0.544	0.027	0.0725	0.0026	0.23822	441.06	8.88	451.2	7.81	388.5	60.5		452.05	7.83	446.94	6.49	-2.8
DZ01_80	236	0.827		0.0558	0.0026	0.553	0.017	0.0723	0.0028	0.23764	446.96	5.56	450	8.42	431.4	48.3		450.25	8.42	447.71	5.09	-0.9
DZ01_5	567	2.89		0.0581	0.002	0.573	0.026	0.0701	0.0029	0.61052	459.95	8.39	436.76	8.73	577.5	41.8		434.81	8.7	449.21	7.79	6.5
DZ01_85	118	0.696		0.0561	0.0019	0.564	0.026	0.0732	0.0023	0.64694	454.13	8.44	455.41	6.91	447.7	39.1		455.51	6.91	455.11	6.73	-0.34
DZ01_39	102.2	1.652		0.0576	0.0034	0.57	0.028	0.073	0.0028	0.1715	458.01	9.05	454.2	8.41	477.2	62.9		453.88	8.41	455.94	6.68	1
DZ01_103	356	1.619		0.0558	0.0024	0.58	0.024	0.0731	0.0029	0.24697	464.46	7.71	454.81	8.71	512.5	54.7		453.99	8.7	460.38	6.46	2.7
DZ01_106	615	1.301		0.0545	0.0027	0.576	0.023	0.0757	0.004	0.30175	461.89	7.41	470.4	12	419.7	62.3		471.1	12	463.53	7.02	-2.5
DZ01_31	219	0.992		0.057	0.0033	0.589	0.026	0.0759	0.0028	0.046069	470.23	8.31	471.6	8.39	463.5	62.3		471.72	8.39	470.91	6.03	-0.37
DZ01_28	406	1.94		0.0557	0.0029	0.577	0.029	0.0767	0.0024	0.39478	462.53	9.34	476.4	7.18	394.3	53.4		477.57	7.2	472.25	6.62	-3.6
DZ01_95	622	0.783		0.0568	0.0023	0.598	0.027	0.0765	0.0037	0.62917	475.96	8.58	475.2	11.1	479.7	44.6		475.1	11.1	475.83	8.44	0.22
DZ01_100	325	0.994		0.0547	0.0022	0.594	0.024	0.0777	0.0036	0.1695	473.42	7.64	482.4	10.8	430.2	62.5		483.1	10.8	476.13	6.68	-2.5
DZ01_77	229	1.76		0.0566	0.0026	0.599	0.025	0.0789	0.0026	0.42343	476.6	7.94	489.55	7.77	414.7	45.6		490.67	7.78	483.25	6.58	-3.4
DZ01_50	439	2.94		0.0584	0.0032	0.697	0.073	0.0807	0.0036	0.58117	537	21.8	500.3	10.7	696.1	92.4		497	10.7	497.5	10.7	9.2
DZ01_113	51.3	1.266		0.0605	0.0042	0.691	0.039	0.0844	0.0037	0.34079	533.4	11.7	522.3	11	581	63.5		521.3	11	527.29	9.32	2.7
DZ01_22	139	1.224		0.0572	0.0025	0.715	0.026	0.0902	0.0026	0.39399	547.71	7.7	556.72	7.69	510.4	40		557.54	7.7	552.19	6.4	-2.1
DZ01_35	185	0.654		0.0581	0.0027	0.729	0.034	0.0913	0.0046	0.57046	555.97	9.98	563.2	13.6	526.4	49.4		563.9	13.6	557.2	9.76	-1.8
DZ01_51	201	0.602		0.0664	0.0063	0.82	0.072	0.091	0.0038	0.32397	608	20.1	561.4	11.2	785.7	88.3		557.1	11.1	567.2	11	10
DZ01_27	240	0.972		0.0617	0.0035	0.882	0.045	0.0976	0.0043	0.49729	642.1	12.1	600.3	12.6	791.8	50.4		596.3	12.5	622	10.9	8.8
DZ01_88	515	2.72		0.063	0.0028	0.994	0.062	0.1154	0.0072	0.78865	700.8	15.8	704	20.8	690.3	43.3		704.4	20.8	700.6	15.7	-0.71
DZ01_116	476	4.15		0.0629	0.0038	1.074	0.088	0.1218	0.0088	0.73951	740.7	21.5	740.9	25.3	740.1	59.6		740.9	25.3	740.7	21.2	-0.041
DZ01_14	217	1.74		0.068	0.0031	1.153	0.053	0.1218	0.0052	0.37714	778.7	12.5	740.9	14.9	888.4	51.2		736.8	14.9	764.7	11.4	6.8
DZ01_66	348	1.47		0.0654	0.0033	1.14	0.07	0.1246	0.0073	0.69908	772.5	16.6	757	20.9	817.7	48.7		755.3	20.9	770.2	16.6	2.9
DZ01_20	380	1.35		0.0689	0.002	1.169	0.046	0.119	0.0047	0.59003	786.2	10.8	724.8	13.5	964.5	36.4		718.2	13.4	770.4	10.8	11
DZ01_68	155.8	2.19		0.0649	0.0027	1.23	0.058	0.135	0.0044	0.50281	814.3	13.2	816.3	12.5	808.9	43.6		816.6	12.5	815.4	11.1	-0.33
DZ01_36	97.8	1.2		0.068	0.0031	1.257	0.047	0.1346	0.0048	0.45717	826.6	10.6	814.1	13.6	860.3	39.5		812.6	13.6	823.1	10	2.1
DZ01_70	150	1.116		0.0666	0.0024	1.247	0.059	0.1404	0.0054	0.63315	822.1	13.3	846.9	15.3	755.3	39.7		849.8	15.3	829.7	12.5	-4.2
DZ01_93	329	2.72		0.0656	0.0026	1.308	0.057	0.1418	0.0068	0.59191	849.2	12.5	854.8	19.2	834.7	43.3		855.5	19.2	849.6	12.5	-0.97
DZ01_32	241.3	0.733		0.073	0.0027	1.413	0.079	0.1396	0.0056	0.61153	894.4	16.6	842.4	15.8	1025.3	45.1		836.2	15.7	863.2	15	8.3
DZ01_78	368	1.075		0.0657	0.0051	1.42	0.22	0.147	0.0071	0.76447	897.4	46.2	884.1	20	930	125		882.5	19.9	880.5	17.7	2.4
DZ01_61	372	3.92		0.0732	0.0043	1.511	0.089	0.1525	0.0092	0.61529	934.8	18	915	25.7	982	53.3		912.5	25.7	932.9	18	3.2
DZ01_89	346	1.22		0.0768	0.0044	1.62	0.17	0.153	0.016	0.83069	978	32.9	917.8	44.7	1115.8	60.8		910.1	44.4	991.2	33.4	10
DZ01_119	450	2.32		0.0697	0.004	1.668	0.061	0.1713	0.0089	0.36157	996.4	11.6	1019.3	24.5	946.5	52.8		1022.3	24.6	997.8	11.5	-3.4
DZ01_112	117	2.3		0.0886	0.0051	2.61	0.4	0.211	0.026	0.94035	1303.5	56.3	1234.1	69.2	1419.4	53.7		1419.4	53.7	1367.4	53.5	12
DZ01_6	51.5	1.21		0.1035	0.0045	3.62	0.26	0.249	0.012	0.74995	1553.9	28.6	1433.3	31	1722	43.9		1722	43.9	1498.4	31.3	13
DZ01_30	98.5	0.827		0.1074	0.0045	3.88	0.21	0.26	0.014	0.74925	1609.5	21.8	1489.8	35.8	1769.9	34.9		1769.9	34.9	1631.7	21.8	13
DZ01_16	114.5	1.75		0.1111	0.0053	4.12	0.22	0.264	0.015	0.57868	1658.3	21.8	1510.3	38.3	1851.2	45.8		1851.2	45.8	1657.6	22.5	15
DZ01_37	88.2	3.87		0.1089	0.0056	3.89	0.33	0.254	0.02	0.84833	1611.6	34.3	1459.1	51.4	1817.1	41.2		1817.1	41.2	1674.7	32.5	17
DZ01_65	127	1.337		0.1025	0.0052	4.51	0.21	0.317	0.011	0.43936	1732.8	19.3	1775.1	26.9	1682.2	40.8		1682.2	40.8	1742	18.2	-3.9
DZ01_53	74.9	0.242		0.1113	0.0046	4.74	0.2	0.305	0.016	0.6441	1774.3	17.7	1716.1	39.5	1843.6	37.1		1843.6	37.1	1782.5	17.1	5.5
DZ01_8	134	2.11		0.1112	0.0043	5.03	0.26	0.33	0.016	0.74564	1824.4	21.9	1838.4	38.8	1808.4	32.6		1808.4	32.6	1821.4	21.1	-1.3
DZ01_76	434	3.67		0.1137	0.0059	5.31	0.23	0.347	0.016	0.30961	1870.5	18.5	1920.3	38.3	1815.6	47.7		1815.6	47.7	1874.8	18.1	-4.3
DZ01_90	76.2	0.93		0.1215	0.0048	5.67	0.18	0.34	0.014	0.41622	1926.8	13.7	1886.7	33.7	1970.3	35.8		1970.3	35.8	1926.9	13.7	3.4
DZ01_43	111.8	1.048		0.1506	0.0061	8.61	0.39	0.414	0.023	0.592	2297.6	20.6	2233.2	52.4	2355.4	39.7		2355.4	39.7	2304.9	20	4.8
DZ01_44	380	3.5		0.1524	0.0082	9.49	0.56	0.45	0.025	0.64211	2386.6	27.1	2395.3	55.6	2379.2	41.4		2379.2	41.4	2385.5	26.6	-0.61
DZ01_111	293	1.136		0.1515	0.0059	9.34	0.46	0.435	0.018	0.85362	2372	22.6	2328.2	40.4	2409.8	21.8		2409.8	21.8	2392.2	19.4	3.4
DZ01_52	340	1.13		0.157	0.0056	8.48	0.99	0.391	0.048	0.9717	2283.8	53	2127	111	2426.8	24.7		2426.8	24.7	2400.1	19.4	14
DZ01_69	86.5	0.677		0.1688	0.0086	10.11	0.43	0.44	0.024	0.69463	2444.9	19.6	2350.6	53.7	2524.2	33.2		2524.2	33.2	2463	17.7	6.7
DZ01_26	57.9	1.6		0.1536	0.0052	10.4	0.42	0.484	0.02	0.57458	2471	18.7	2544.7	43.4	2411	32		2411	32	2464.4	18.4	-5
DZ01_9	220	2.44		0.246	0.014	20.07	0.89	0.567	0.025	0.31371	3094.7	21.4	2895.5	51.4	3226.7	40.9		3226.7	40.9	3083.6	21.9	12
MVDZ01, discordant analyses (excluded from plots and interpretation)
DZ01_2	42.5	1.95		0.197	0.01	10.6	0.59	0.403	0.022	0.5738	2489	53	2180	100	2795	82		2795	82	2498.8	27	22
DZ01_12	276	1.69		0.0657	0.0057	0.483	0.031	0.053	0.0032	-0.15129	398	21	333	19	720	170		327.62	9.64	363.34	6.76	22
DZ01_114	46.7	1.067		0.0636	0.0089	0.43	0.063	0.0477	0.0016	0.38698	356	42	300.4	9.8	690	260		296.93	4.87	297.64	4.84	22
DZ01_55	94	1.113		0.0711	0.0067	0.523	0.047	0.055	0.0038	0.24681	424	31	345	23	910	210		338.6	11.4	368.2	10.6	25
DZ01_1	275	0.735		0.0674	0.0051	0.361	0.023	0.039	0.0019	0.22262	312	17	246	12	800	150		241.76	5.78	263.34	5.43	27
DZ01_63	167	1.134		0.0706	0.0072	0.433	0.04	0.0449	0.0034	0.44216	362	28	283	21	850	200		276.9	10.3	300	10.3	30
DZ01_10	296	0.833		0.0827	0.0051	0.981	0.05	0.0859	0.0038	0.39657	697	27	531	23	1220	120		515.4	11	582.9	10.7	35
DZ01_11	297	1.91		0.104	0.016	0.82	0.16	0.0552	0.0031	0.40544	587	76	346	19	1580	220		329.8	9.03	333.04	9.2	71
DZ01_45	137	0.84		0.11	0.018	0.74	0.14	0.0465	0.004	0.46993	540	80	297	26	1600	290		270.2	11.4	272.3	12	81
DZ01_48	108.9	1.76		0.137	0.037	2.11	0.76	0.0972	0.0083	0.77643	940	160	596	49	1780	410		546.8	22.4	531	16.9	100
DZ01_107	77	1.017		0.15	0.045	1.67	0.87	0.058	0.0095	0.98611	700	190	361	56	1840	540		294.1	23.5	273.81	5.33	140
DZ01_54	969	2.79		0.0978	0.0057	4.42	0.22	0.332	0.014	0.15115	1709	42	1846	68	1600	110		1600	110	1745	18.1	-12
DZ01_84	305	1.615		0.0645	0.0037	1.51	0.089	0.17	0.0085	0.65387	938	39	1011	47	770	120		1022	23.6	944.5	17.1	-12
DZ01_7	59	1.01		0.1144	0.0045	6.3	0.31	0.398	0.018	0.61081	2011	43	2156	84	1871	69		1871	69	2007.2	21.1	-11
DZ01_74	151	2.27		0.0657	0.0029	1.563	0.063	0.1731	0.0076	0.43053	958	26	1028	41	810	85		1038.7	21.1	963.8	12.1	-11
DZ01_99	914	5.58		0.0568	0.0029	1.023	0.047	0.1261	0.005	0.049097	713	23	765	28	480	120		770.9	14.4	735	9.18	-9.2
DZ01_75	42.2	0.756		0.1044	0.0054	4.93	0.21	0.345	0.014	0.44632	1810	38	1910	67	1695	99		1695	99	1812.7	17.6	-9
DZ01_18	353	1.233		0.1503	0.0066	10.11	0.42	0.488	0.018	0.27313	2439	38	2556	80	2351	71		2351	71	2456.9	18.3	-8.1
DZ01_15	301	6.3		0.0702	0.0033	1.699	0.07	0.1789	0.0062	0.34405	1006	26	1060	34	910	95		1068.1	17.1	1024.1	11.7	-7.4
DZ01_109	369	2.65		0.0659	0.0025	1.321	0.061	0.1493	0.0058	0.50682	857	28	902	32	786	83		902	16.4	867.2	12.3	-6.8
DZ01_91	498	1.291		0.0524	0.0027	0.553	0.027	0.0759	0.0026	0.051969	446	18	474	16	280	110		473.68	7.82	460.75	5.94	-6.6
DZ01_46	187.4	0.583		0.0949	0.0044	3.85	0.18	0.295	0.018	0.62151	1597	38	1661	92	1541	86		1541	86	1595.1	18.3	-6.3
DZ01_33	890	1.62		0.0491	0.0024	0.319	0.015	0.0468	0.0021	0.30179	281	11	295	13	150	100		295.85	6.49	286.83	4.88	-5.8
DZ01_97	301	2.55		0.0535	0.003	0.515	0.025	0.0709	0.0024	0.090551	421	17	441	14	350	130		443.2	7.25	433.19	5.67	-5.6
MVDZ09, Pakabulake Fm, Fluvial
DZ09_83	230	2.82		0.0536	0.0033	0.253	0.017	0.0341	0.002	0.96209	229.01	6.89	216.16	6.23	363.1	21.7		215.26	6.21	205.07	6.33	8.7
DZ09_36	873	1.656		0.0515	0.0026	0.229	0.01	0.032	0.0018	0.45992	209.37	4.13	203.05	5.62	281.1	60.7		202.62	5.61	207.89	3.96	4
DZ09_70	330	1.685		0.0575	0.0037	0.346	0.045	0.0419	0.0025	0.93083	301.7	17	264.6	7.73	599.6	84.1		261.87	7.66	242.8	4.6	18
DZ09_76	513	1.96		0.0514	0.0029	0.284	0.016	0.0395	0.0023	0.68068	253.83	6.33	249.73	7.13	291.8	52.3		249.44	7.12	252.52	6.11	2.1
DZ09_2	978	6.75		0.0531	0.003	0.32	0.018	0.0434	0.0022	0.98859	281.9	6.92	273.87	6.8	349	11.1		273.29	6.78	266.98	7.89	4.4
DZ09_49	639	1.164		0.057	0.0028	0.338	0.021	0.0428	0.0022	0.73338	295.66	7.97	270.17	6.8	502.2	46.9		268.3	6.75	274.8	6.83	10
DZ09_89	158	1.802		0.0581	0.0036	0.339	0.022	0.0425	0.002	-0.23991	296.41	8.34	268.31	6.18	524.1	97.4		266.25	6.14	278.9	4.38	12
DZ09_91	1091	0.902		0.0542	0.0024	0.323	0.017	0.0435	0.0023	0.71644	284.21	6.52	274.49	7.1	364.9	44.8		273.78	7.09	280.73	6.32	4.4
DZ09_35	197	5.58		0.0528	0.0029	0.326	0.017	0.0457	0.0027	0.55871	286.51	6.51	288.07	8.32	273.8	60.3		288.18	8.33	286.88	6.28	-0.71
DZ09_60	573	1.53		0.0532	0.0026	0.328	0.019	0.0448	0.0025	0.91832	288.04	7.26	282.52	7.71	333.1	26.2		282.11	7.7	287.21	7.35	2.6
DZ09_15	257	1.92		0.0499	0.0027	0.337	0.024	0.0477	0.0025	0.68351	294.9	9.11	300.39	7.69	251.6	60		300.79	7.7	299.02	7.48	-2.1
DZ09_31	155.6	1.81		0.0514	0.0029	0.338	0.021	0.048	0.0024	0.44345	295.66	7.97	302.23	7.38	244	69.2		302.72	7.39	299.37	6.48	-2.6
DZ09_23	108.8	1.959		0.0535	0.0034	0.362	0.026	0.0476	0.0023	0.50686	313.71	9.69	299.77	7.08	418.6	70.4		298.73	7.05	302.52	6.89	5.2
DZ09_44	639	2.091		0.052	0.0024	0.345	0.016	0.049	0.0021	0.64276	300.95	6.04	308.38	6.45	243.8	43.6		308.93	6.46	303.95	5.61	-3
DZ09_52	130	1.271		0.0563	0.0035	0.37	0.025	0.0478	0.0025	0.6437	319.65	9.26	301	7.69	457.9	58.2		299.6	7.66	305.34	7.55	6.9
DZ09_12	303	1.145		0.0596	0.0024	0.392	0.019	0.0474	0.0022	0.72954	335.83	6.93	298.54	6.77	602.9	37.8		295.72	6.71	314.05	6.58	14
DZ09_90	508	1.46		0.0535	0.0027	0.369	0.021	0.0495	0.0029	0.7483	318.91	7.79	311.45	8.91	373.8	46.1		310.89	8.89	317.07	7.7	3.1
DZ09_87	597	1.238		0.055	0.0023	0.441	0.022	0.0584	0.0026	0.76366	370.96	7.75	365.89	7.92	402.8	36.8		365.49	7.91	368.62	7.39	1.7
DZ09_81	286	0.938		0.0624	0.0048	0.511	0.06	0.059	0.005	0.55543	419.1	20.2	369.5	15.2	702	106		365.6	15.1	378.1	15.1	15
DZ09_27	410	2.51		0.0525	0.0024	0.461	0.027	0.0628	0.0033	0.7516	384.95	9.38	392.6	10	339	44.8		393.2	10	387.75	8.97	-2.5
DZ09_56	240	1.736		0.0568	0.0037	0.504	0.033	0.0643	0.0036	0.29098	414.4	11.1	401.7	10.9	485.7	80.3		400.7	10.9	407.82	8.9	3.8
DZ09_105	372	1.337		0.0597	0.0031	0.528	0.035	0.062	0.004	0.65282	430.5	11.6	387.8	12.1	666	58.4		384.3	12	410.5	11.1	13
DZ09_120	314	1.63		0.0619	0.0039	0.522	0.035	0.0635	0.0039	0.55522	426.5	11.7	396.9	11.8	589.8	65.9		394.5	11.8	411.6	10.5	8.9
DZ09_111	289	1.215		0.0569	0.0032	0.51	0.03	0.065	0.0033	0.595	418.4	10.1	405.96	9.99	487.9	55		404.95	9.96	411.95	9.03	3.7
DZ09_101	359	1.395		0.0592	0.003	0.53	0.031	0.0645	0.0034	0.63033	431.8	10.3	402.9	10.3	588.9	52.2		400.6	10.2	416.8	9.47	8.6
DZ09_48	161	2.081		0.0578	0.0027	0.531	0.034	0.0665	0.003	0.58051	432.5	11.3	415.03	9.07	526.4	57.8		413.6	9.04	419.21	8.82	5
DZ09_46	730	1.46		0.055	0.0029	0.523	0.03	0.0703	0.0041	0.80642	427.2	10	438	12.3	369.2	40.6		438.9	12.4	427.21	9.92	-3.6
DZ09_110	475	3.16		0.0621	0.0035	0.572	0.034	0.066	0.0033	0.57957	459.3	11	412.01	9.98	703.4	54.1		408.08	9.89	428.73	9.51	13
DZ09_108	484	3.76		0.0575	0.0031	0.539	0.032	0.069	0.0035	0.74401	437.8	10.6	430.1	10.6	478.1	44.4		429.5	10.5	433.88	9.93	2.2
DZ09_112	349	2.12		0.0594	0.003	0.577	0.037	0.0695	0.0035	0.7397	462.5	11.9	433.1	10.5	611.2	46.7		430.7	10.5	440	10.6	8
DZ09_37	92.2	1.9		0.06	0.0038	0.581	0.039	0.0692	0.0037	0.58946	465.1	12.5	431.3	11.2	635.5	60.2		428.5	11.1	442.7	10.7	9.2
DZ09_55	210	1.332		0.0665	0.0036	0.61	0.037	0.067	0.0042	0.61703	483.6	11.7	418.1	12.7	807.4	56.5		412.5	12.5	455.4	11.4	19
DZ09_54	223	1.197		0.06	0.0038	0.583	0.03	0.0697	0.004	0.53357	466.39	9.62	434.3	12.1	627.4	56.9		431.7	12	457.43	9.33	9.4
DZ09_63	297	1.394		0.0569	0.0027	0.604	0.028	0.0778	0.0033	0.51259	479.77	8.86	482.98	9.87	464.5	48.7		483.25	9.87	481.02	8.07	-0.86
DZ09_77	423	2.69		0.0661	0.0046	0.65	0.045	0.0753	0.0044	0.38264	508.5	13.8	468	13.2	694.9	76.2		464.5	13.1	486	11.4	10
DZ09_86	322	1.972		0.0603	0.0032	0.62	0.041	0.0751	0.0051	0.80618	489.8	12.8	466.8	15.3	599.1	45.2		464.8	15.2	487.7	13.1	6.8
DZ09_80	284	8.82		0.0618	0.0042	0.642	0.041	0.0771	0.0039	0.59356	503.5	12.7	478.8	11.7	617.6	57.1		476.6	11.6	488.2	11	6.3
DZ09_104	671	1.92		0.0634	0.0041	0.651	0.05	0.0747	0.0054	0.77523	509.1	15.4	464.4	16.2	715.2	53.3		460.5	16.1	489.8	15.5	12
DZ09_30	97.7	0.823		0.0593	0.0045	0.775	0.07	0.096	0.005	0.49417	582.6	20	590.9	14.7	550.4	86.1		591.7	14.7	589.1	14.1	-1.8
DZ09_51	278	1.299		0.0607	0.0031	0.865	0.054	0.1023	0.0066	0.71574	632.8	14.7	627.9	19.3	650.7	51.4		627.4	19.3	632.5	14.7	1.1
DZ09_100	67.3	0.895		0.0741	0.0045	1.15	0.11	0.1133	0.008	0.81555	777.2	26	691.9	23.2	1030.9	56.4		682.8	22.9	693	25.1	16
DZ09_94	476	1.375		0.0651	0.0032	0.934	0.074	0.1038	0.008	0.95616	669.7	19.4	636.6	23.4	782.7	24.4		633.4	23.2	707.3	18	12
DZ09_115	580	4.06		0.0747	0.0043	1.176	0.076	0.1151	0.0065	0.52775	789.4	17.7	702.3	18.8	1044.3	59.8		692.9	18.6	747.3	16.7	16
DZ09_14	346	1.353		0.0664	0.0032	1.103	0.085	0.1212	0.0097	0.81667	754.8	20.5	737.5	27.9	806.5	49.9		735.6	27.8	757.8	20.5	3.7
DZ09_62	251	2.28		0.0645	0.0034	1.116	0.058	0.126	0.0063	0.49881	761.1	13.9	765	18	749.5	53.9		765.4	18	762.1	13.3	-0.72
DZ09_79	194	0.977		0.0642	0.0031	1.164	0.088	0.1286	0.0078	0.71708	783.8	20.6	779.9	22.3	795.1	55.7		779.4	22.3	782.4	19.8	0.7
DZ09_45	59.6	0.54		0.0661	0.003	1.232	0.059	0.1364	0.0061	0.679	815.2	13.4	824.3	17.3	790.7	39		825.3	17.3	816.5	13.2	-1.6
DZ09_21	367	1.74		0.0652	0.0036	1.262	0.077	0.1366	0.0087	0.96954	828.8	17.3	825.4	24.7	837.9	16.3		825	24.7	833.6	11.5	1.1
DZ09_57	145	0.901		0.0644	0.0031	1.276	0.069	0.1386	0.0077	0.73495	835.1	15.4	836.7	21.8	830.6	41.6		836.9	21.8	835	15.4	-0.31
DZ09_67	405	0.792		0.0678	0.0037	1.25	0.076	0.1306	0.0081	0.88561	823.4	17.1	791.3	23.1	911.2	30.3		787.7	23	838.3	16.6	7.1
DZ09_98	151	1.196		0.0687	0.004	1.318	0.079	0.1388	0.0084	0.61048	853.6	17.3	837.9	23.8	894.8	54.9		836	23.7	851.5	17.2	2.7
DZ09_42	867	2.132		0.0686	0.0032	1.338	0.066	0.1398	0.0078	0.71491	862.4	14.3	843.5	22.1	911.1	41.3		841.3	22	864	14.3	3.4
DZ09_103	405	1.05		0.0767	0.0049	1.26	0.14	0.123	0.014	0.92353	827.9	31.4	747.8	40.2	1049.5	44.4		738.9	39.7	888.1	29.9	20
DZ09_39	426	2.81		0.0713	0.0033	1.392	0.079	0.1424	0.0087	0.90063	885.5	16.8	858.2	24.5	954.4	27.2		855	24.5	903	14.9	6
DZ09_75	347	1.336		0.0691	0.0043	1.28	0.11	0.1328	0.0099	0.98391	836.9	24.5	803.8	28.2	925.6	18.8		800.1	28	920.7	18	15
DZ09_74	100.7	1.241		0.0715	0.004	1.44	0.12	0.147	0.014	0.98843	905.7	25	884.1	39.3	958.8	18.4		881.5	39.2	937.7	9.24	6.4
DZ09_20	272	1.69		0.0677	0.0034	1.578	0.093	0.165	0.01	0.64724	961.6	18.3	984.5	27.7	909.5	51.7		987.4	27.7	961.9	18.2	-3.6
DZ09_40	139.6	1.225		0.0702	0.0035	1.575	0.088	0.1626	0.0076	0.74653	960.4	17.4	971.2	21.1	935.7	38.5		972.6	21.1	961.9	17.1	-1.6
DZ09_18	108	1.767		0.0735	0.0036	1.58	0.11	0.1611	0.0071	0.81864	962.4	21.6	962.9	19.7	961.2	42.9		963	19.7	962.8	19.5	-0.078
DZ09_24	490	3.58		0.0739	0.0038	1.635	0.079	0.1651	0.0068	0.50953	983.8	15.2	985.1	18.8	981	45.6		985.2	18.8	984.2	14.4	-0.19
DZ09_88	93	1.021		0.0698	0.0025	1.644	0.095	0.1647	0.0077	0.80773	987.2	18.2	982.8	21.3	997.1	34.6		982.3	21.3	986.7	18.3	0.66
DZ09_113	254	1.59		0.0731	0.0038	1.682	0.089	0.172	0.01	0.67663	1001.7	16.8	1023.1	27.5	955.2	45.9		1026	27.6	1000.2	16.7	-3.3
DZ09_97	328	0.54		0.0734	0.0034	1.689	0.099	0.1715	0.0089	0.81117	1004.4	18.7	1020.4	24.5	969.7	35.2		1022.5	24.5	1002.7	18.5	-2.5
DZ09_69	82.5	0.349		0.0773	0.0046	1.69	0.12	0.153	0.011	0.77463	1004.8	22.6	917.8	30.8	1199.7	47.3		906.6	30.4	1009.8	23.7	14
DZ09_92	418	1.92		0.0748	0.0035	1.727	0.086	0.1677	0.0084	0.67601	1018.6	16	999.4	23.2	1060.2	40.5		996.9	23.1	1018.2	16.1	2.9
DZ09_58	472	1.512		0.0767	0.004	1.78	0.11	0.1716	0.009	0.65857	1038.2	20.1	1020.9	24.8	1074.7	48.2		1018.6	24.7	1034.4	19.9	2.5
DZ09_82	434	1.816		0.0738	0.0041	1.78	0.091	0.1764	0.0099	0.68464	1038.2	16.6	1047.3	27.1	1019.1	43.4		1048.5	27.2	1037.4	16.5	-1.4
DZ09_106	101.7	0.857		0.0818	0.0042	1.91	0.11	0.174	0.011	0.65918	1084.6	19.2	1034.1	30.2	1187.4	49.5		1027.1	30	1085.7	19.5	7.3
DZ09_109	275	1.316		0.0801	0.0049	1.98	0.13	0.177	0.01	0.5157	1108.7	22.1	1050.6	27.4	1224.6	59.6		1042.3	27.2	1090.8	21.6	7.9
DZ09_116	155.1	1.002		0.0803	0.0038	1.99	0.11	0.183	0.011	0.56248	1112.1	18.7	1083.3	30	1168.8	53.6		1079.2	29.9	1110.4	18.8	4
DZ09_95	351	1.064		0.0876	0.004	2.12	0.11	0.18	0.0083	0.68349	1155.3	17.9	1067	22.7	1325.1	38.1		1054.1	22.4	1138.8	18.7	12
DZ09_66	249.2	0.536		0.0794	0.0035	2.27	0.13	0.204	0.011	0.99472	1203	20.2	1196.8	29.4	1214.24	6.51		1214.24	6.51	1215.33	6.17	1.7
DZ09_13	481	8.3		0.0861	0.0031	2.51	0.1	0.2141	0.0089	0.77333	1274.9	14.5	1250.6	23.6	1316.1	26.6		1316.1	26.6	1280.5	14.1	3.2
DZ09_34	67.1	0.743		0.0876	0.0045	2.91	0.13	0.238	0.01	0.54878	1384.5	16.9	1376.3	26	1397.2	39.5		1397.2	39.5	1383.8	16.8	0.92
DZ09_7	302	2.75		0.0967	0.0045	3	0.15	0.23	0.012	0.5298	1407.6	19	1334.5	31.4	1520.1	46.7		1520.1	46.7	1402.4	19.3	8.3
DZ09_38	137	3.25		0.103	0.0053	3.39	0.25	0.243	0.014	0.78616	1502.1	28.9	1402.3	36.3	1645.9	42.3		1645.9	42.3	1496.5	31.3	11
DZ09_22	236	0.707		0.0913	0.0043	3.44	0.22	0.27	0.014	0.68212	1513.6	25.2	1540.8	35.5	1475.7	45		1475.7	45	1514.4	24.9	-2.8
DZ09_9	194	1.97		0.102	0.0043	3.53	0.23	0.246	0.018	0.79838	1534	25.8	1417.8	46.6	1698	41.1		1698	41.1	1571.8	23.6	13
DZ09_78	25.4	0.749		0.1117	0.0068	4.76	0.34	0.296	0.015	0.68091	1777.9	30	1671.4	37.3	1905.2	47		1905.2	47	1754.1	31.7	10
DZ09_3	30.7	0.935		0.1084	0.0058	4.66	0.24	0.311	0.014	0.53893	1760.1	21.5	1745.6	34.4	1777.3	42.6		1777.3	42.6	1759	21.5	1.3
DZ09_71	140.2	0.719		0.115	0.0055	4.94	0.26	0.31	0.018	0.75458	1809.1	22.2	1740.7	44.3	1888.9	35.2		1888.9	35.2	1826.7	20.6	6.5
DZ09_64	596	0.87		0.1124	0.0057	4.88	0.3	0.311	0.022	0.99886	1798.8	25.9	1745.6	54.1	1861.03	8.83		1861.03	8.83	1845.98	2.2	6.5
DZ09_73	72.1	0.749		0.1184	0.0055	5.42	0.36	0.32	0.019	0.908	1888	28.5	1789.7	46.4	1997.9	24.7		1997.9	24.7	1957	21.9	11
DZ09_117	293	2.27		0.1247	0.0052	5.88	0.3	0.347	0.017	0.86956	1958.3	22.1	1920.3	40.7	1998.7	22.8		1998.7	22.8	1977.6	18.2	3.6
DZ09_32	162	1.19		0.1369	0.0068	6.81	0.29	0.358	0.018	0.62403	2087	18.9	1972.7	42.7	2201.8	35.5		2201.8	35.5	2101.2	18.4	9.3
DZ09_50	73.9	2.32		0.1489	0.0064	8.67	0.4	0.431	0.025	0.77871	2303.9	21	2310.2	56.3	2298.4	31.3		2298.4	31.3	2302.2	17.7	-0.47
DZ09_43	436	2.47		0.1577	0.0064	9.68	0.56	0.438	0.023	0.95111	2404.8	26.6	2341.7	51.6	2458.7	15.2		2458.7	15.2	2453.8	14.4	5.6
DZ09_114	267	1.134		0.1635	0.0074	10.05	0.62	0.44	0.026	0.74408	2439.4	28.5	2350.6	58.2	2514.2	36.4		2514.2	36.4	2461.1	26.4	6.3
DZ09_33	84	1.244		0.1575	0.0076	10.47	0.4	0.486	0.023	0.62071	2477.3	17.7	2553.3	49.9	2415.4	32.4		2415.4	32.4	2466.8	16.8	-5.2
DZ09_93	955	4.1		0.1641	0.0093	10.47	0.62	0.458	0.026	0.99403	2477.3	27.4	2430.7	57.5	2515.67	5.71		2515.67	5.71	2517.48	5.33	4.2
DZ09_119	1028	5.38		0.1785	0.0078	10.61	0.62	0.442	0.039	0.95596	2489.6	27.1	2359.6	87.2	2597.4	30.5		2597.4	30.5	2540.8	10.6	9.5
DZ09_107	157.3	2.39		0.1882	0.0087	12.12	0.65	0.478	0.027	0.7398	2613.7	25.2	2518.5	58.9	2688.3	32.9		2688.3	32.9	2636.9	22.5	6.4
DZ09_4	79.6	2.06		0.1853	0.0088	13.16	0.64	0.515	0.026	0.54324	2691.2	22.9	2677.9	55.3	2701.2	39.1		2701.2	39.1	2692.2	22.7	0.85
DZ09_19	216	1.99		0.211	0.01	16.81	0.9	0.566	0.031	0.71337	2924.1	25.7	2891.4	63.8	2946.6	33.1		2946.6	33.1	2931	23.4	1.9
MVDZ09, discordant analyses (excluded from plots and interpretation)
DZ09_85	223	1.115		0.0788	0.0037	1.352	0.083	0.1252	0.0083	0.86557	878	29	758	48	1161	91		748.1	23.4	905.8	18.5	22
DZ09_8	27	0.44		0.0848	0.0072	1.46	0.1	0.1263	0.007	0.13183	910	45	765	40	1340	170		749.5	19.6	831.8	16.1	24
DZ09_102	109	1.168		0.178	0.01	7.49	0.57	0.335	0.026	0.74979	2177	64	1850	120	2669	87		2669	87	2245.7	32.4	26
DZ09_29	284	3.37		0.1561	0.0076	6.7	0.31	0.314	0.018	0.66872	2082	37	1752	88	2396	84		2396	84	2122	19.6	27
DZ09_53	710	3.89		0.0691	0.0066	0.337	0.03	0.0352	0.0021	0.34841	292	23	223	13	850	190		217.81	6.39	231.28	6.46	31
DZ09_96	1289	5.01		0.0927	0.0048	1.74	0.12	0.1339	0.0085	0.74898	1016	46	808	48	1473	88		783.3	23.4	897.2	27.6	33
DZ09_118	639	1.344		0.0573	0.0028	0.369	0.023	0.0473	0.003	0.99474	317	17	297	18	500	110		296.35	9.19	421.45	4.89	36
DZ09_11	364	1.606		0.0726	0.0041	0.738	0.049	0.0719	0.0039	0.90756	563	26	447	24	1010	120		437.5	11.5	356.5	11.5	40
DZ09_99	620	2.31		0.1482	0.0089	5.29	0.39	0.251	0.016	0.7189	1852	66	1440	80	2340	110		2340	110	1732.1	50.3	42
DZ09_68	624	3.78		0.0874	0.0041	1.235	0.066	0.1092	0.005	0.92823	811	30	667	29	1365	90		652.1	14.2	509.9	17	45
DZ09_84	715	0.844		0.1098	0.0066	1.54	0.1	0.1031	0.0072	0.57854	954	40	631	42	1800	110		596.7	19.9	734.6	22.7	55
DZ09_28	870	1.566		0.094	0.011	0.65	0.11	0.0493	0.0028	0.71224	493	66	310	17	1420	230		293.81	8.16	279.11	7.02	62
DZ09_61	204	1.277		0.161	0.02	4.09	0.66	0.173	0.011	0.7169	1560	130	1034	65	2320	230		940.5	27.8	880.4	25.7	93
DZ09_47	161	0.812		0.133	0.012	1.44	0.2	0.0715	0.0051	0.87332	865	78	444	31	2160	160		396.3	13.7	308.49	9.33	110
DZ09_17	77.9	0.484		0.4	0.033	11.3	1.3	0.196	0.016	0.80564	2610	100	1147	85	3930	120		678.4	26.3	606.1	31.6	210
DZ09_59	460	1.02		0.0496	0.0027	0.401	0.028	0.0575	0.0042	0.9909	340	20	360	25	210	120		361.8	12.8	292.37	6.43	-22
DZ09_25	312	1.56		0.0753	0.003	2.35	0.11	0.229	0.012	0.80096	1233	37	1327	62	1117	72		1117	72	1194.1	15.4	-14
DZ09_10	145	1.365		0.0902	0.0042	3.52	0.17	0.291	0.013	0.67713	1544	39	1642	63	1409	85		1409	85	1520.3	18.6	-12
DZ09_65	72	0.761		0.1017	0.0053	4.92	0.27	0.352	0.021	0.68131	1801	47	1940	100	1650	100		1650	100	1781.6	22.3	-12
DZ09_26	132.6	0.95		0.0618	0.0028	1.086	0.061	0.1301	0.0068	0.68238	750	31	787	39	630	100		793	19.5	751	14.4	-7.9
DZ09_16	103	1.55		0.1539	0.0061	10.59	0.6	0.495	0.026	0.84692	2481	53	2580	110	2381	65		2381	65	2444.5	22.2	-7.5
DZ09_5	130	2.199		0.1628	0.0075	11.47	0.58	0.514	0.021	0.7039	2558	50	2667	92	2469	76		2469	76	2542.8	22.8	-7.3
DZ09_41	240	1.629		0.1074	0.004	4.93	0.26	0.338	0.018	0.77927	1803	46	1872	85	1756	68		1756	68	1787	20.7	-6.5
DZ09_6	63.5	1.495		0.1309	0.0056	7.52	0.31	0.419	0.017	0.55279	2174	35	2252	77	2087	75		2087	75	2171.1	18.3	-6.1
DZ09_72	245	1.417		0.0758	0.0039	2.06	0.13	0.198	0.013	0.95497	1135	40	1157	71	1040	100		1040	100	1105.7	14.8	-5.8
DZ09_1	103.6	0.32		0.062	0.0039	1.091	0.056	0.1284	0.0066	0.51519	758	28	778	37	610	130		781.9	18.9	754.5	13.1	-5.5
MVDZ08, Pakabulake Fm, Eolian
DZ08_19	1660	0.72807		0.056	0.0044	0.0157	0.0015	0.00201	0.00016	0.60224	15.82	0.75	12.94	0.51	477.9	87.8		12.77	0.51	13.2	0.51	20
DZ08_94	1518	1.10803		0.0554	0.0063	0.0149	0.0014	0.00205	0.00011	-0.195	15.02	0.7	13.2	0.35	317	133		13.09	0.35	13.64	0.29	13
DZ08_115	610	0.917293		0.0557	0.0059	0.0192	0.002	0.00252	0.00014	0.28085	19.31	1	16.22	0.45	423	115		16.04	0.45	16.47	0.44	18
DZ08_52	576	1.25217		0.0537	0.0035	0.109	0.0084	0.01439	0.00087	0.79506	105.05	3.85	92.1	2.76	409.7	52.3		91.52	2.75	89.97	2.76	14
DZ08_99	489	1.60328		0.0482	0.0028	0.1166	0.0062	0.01735	0.00084	0.48453	111.98	2.82	110.89	2.66	135.4	60.8		110.82	2.66	111.37	2.36	1.1
DZ08_90	706	0.654917		0.0511	0.0032	0.1181	0.0075	0.0175	0.0011	0.65474	113.35	3.41	111.84	3.48	145.2	61.6		111.74	3.48	112.64	3.14	1.6
DZ08_62	260	1.42857		0.0502	0.0033	0.1252	0.0085	0.0188	0.0011	0.56557	119.78	3.84	120.07	3.48	114	70.2		120.09	3.48	119.95	3.21	-0.27
DZ08_78	185.8	1.61145		0.0493	0.0028	0.191	0.014	0.0274	0.0016	0.63406	177.48	5.97	174.26	5.02	220.7	67		174.04	5.01	175.12	4.86	2
DZ08_105	394	5.9697		0.0545	0.0036	0.249	0.014	0.034	0.0019	0.6147	225.76	5.69	215.53	5.92	333.7	55.8		214.82	5.9	221.11	5.25	5.6
DZ08_79	555	1.95423		0.0512	0.0026	0.269	0.018	0.0364	0.0022	0.97099	241.89	7.2	230.48	6.84	354.2	18.8		229.67	6.82	223.69	7.3	6.5
DZ08_109	460	1.16751		0.0564	0.003	0.269	0.017	0.0343	0.0019	0.68981	241.89	6.8	217.4	5.92	486.9	52.1		215.68	5.87	223.69	5.84	12
DZ08_18	3230	1.89554		0.0542	0.0031	0.249	0.017	0.0337	0.0027	0.88153	225.76	6.91	213.66	8.42	353.8	42.8		212.82	8.39	228.44	6.94	8.7
DZ08_100	212	1.09788		0.0529	0.0029	0.259	0.014	0.0355	0.0019	0.54776	233.86	5.65	224.88	5.91	325.1	58.1		224.25	5.9	229.79	5.1	4.7
DZ08_76	3740	4.09639		0.0586	0.0023	0.286	0.014	0.034	0.0017	0.7257	255.41	5.53	215.53	5.3	639.5	39.4		212.71	5.23	230.63	5.2	20
DZ08_70	1350	45.9184		0.0519	0.0024	0.26	0.016	0.0357	0.0021	0.86089	234.67	6.45	226.12	6.54	321.1	36.2		225.52	6.52	230.68	6.35	4.4	high U/Th
DZ08_30	570	2.53333		0.0521	0.0032	0.264	0.019	0.0374	0.0025	-0.09184	237.89	7.63	236.7	7.77	250	118		236.61	7.76	237.3	5.19	0.6
DZ08_96	250	1.81159		0.0585	0.0042	0.287	0.018	0.0367	0.0019	0.40367	256.2	7.1	232.35	5.91	480.6	69.8		230.65	5.86	240.41	5.4	11
DZ08_82	478	1.82443		0.0557	0.0026	0.285	0.02	0.0361	0.0027	0.78058	254.62	7.9	228.61	8.4	501.5	53.1		226.77	8.33	244.52	7.87	13
DZ08_32	190	2.2619		0.0547	0.0028	0.313	0.022	0.0405	0.0023	0.83332	276.5	8.51	255.93	7.12	454.4	43.2		254.86	7.1	255.2	7.26	8.8
DZ08_66	1330	3.16667		0.0502	0.0024	0.296	0.014	0.0421	0.0022	0.62416	263.27	5.48	265.84	6.8	240.5	50		266.02	6.81	263.85	5.33	-1.3
DZ08_56	351	0.948649		0.0601	0.004	0.329	0.019	0.0392	0.0029	0.49326	288.8	7.26	247.87	8.99	634.7	72.9		244.9	8.89	276.15	6.96	20
DZ08_101	146	0.98582		0.0528	0.0035	0.326	0.025	0.0439	0.0026	0.46556	286.51	9.57	276.96	8.03	365.1	81		276.26	8.01	280.15	7.43	3.9
DZ08_80	1450	1.29464		0.0577	0.0033	0.423	0.03	0.0518	0.0033	0.97004	358.2	10.7	325.6	10.1	575.4	19.5		323.1	10	285.9	11.5	19
DZ08_74	1541	1.24475		0.0589	0.0033	0.357	0.021	0.0454	0.0025	0.63726	309.97	7.86	286.22	7.71	492.7	53.6		284.45	7.66	297.04	7.15	9.5
DZ08_25	348	0.776786		0.0529	0.0034	0.374	0.029	0.0496	0.0029	0.7106	322.6	10.7	312.07	8.91	399.5	61.2		311.27	8.88	314.01	8.84	3.8
DZ08_8	127	1.58157		0.0544	0.0032	0.394	0.026	0.0508	0.0032	0.56864	337.29	9.47	319.43	9.82	462.3	66.4		318.07	9.77	328.92	8.62	6.7
DZ08_106	726	0.989101		0.0545	0.0029	0.395	0.024	0.0538	0.0025	0.58926	338.02	8.73	337.81	7.65	339.4	56.9		337.79	7.65	337.88	7.21	0.072
DZ08_48	274	1.53073		0.0544	0.0027	0.421	0.022	0.0546	0.0028	0.64615	356.77	7.86	342.7	8.56	449.3	48.4		341.61	8.53	351.29	7.47	5.1
DZ08_112	1501	1.15284		0.0562	0.0026	0.422	0.024	0.0566	0.003	0.67245	357.48	8.57	354.92	9.15	374.2	50.2		354.72	9.15	356.45	8.09	0.9
DZ08_28	411	1.93868		0.056	0.0044	0.429	0.033	0.0578	0.0041	0.58631	362.5	11.7	362.2	12.5	364	76.1		362.2	12.5	362.4	10.8	0.08
DZ08_11	68	3.34975		0.0569	0.0047	0.484	0.049	0.0641	0.0059	0.67248	400.8	16.8	400.5	17.9	402.6	88.1		400.5	17.9	400.7	15.8	0.095
DZ08_116	207	1.41104		0.0574	0.0032	0.497	0.03	0.0627	0.004	0.54549	409.7	10.2	392	12.1	510.4	65.1		390.6	12.1	404.05	9.69	5.7
DZ08_42	3450	0.782313		0.0569	0.0028	0.516	0.033	0.065	0.0043	0.7565	422.5	11.1	406	13	513.6	49.9		404.6	13	419.4	11.1	5.4
DZ08_104	570	1.07547		0.0638	0.0042	0.572	0.044	0.0664	0.0038	0.49618	459.3	14.2	414.4	11.5	690.5	74.1		410.7	11.4	426.5	11	12
DZ08_58	2070	3.22933		0.0647	0.0037	0.618	0.034	0.0675	0.004	0.4004	488.6	10.7	421.1	12.1	819.1	65.5		415.4	11.9	460.16	9.73	19
DZ08_15	152	1.07042		0.0616	0.0041	0.626	0.054	0.0719	0.0056	0.71884	493.6	16.9	447.6	16.8	713.1	65.9		443.7	16.7	468.4	16.3	12
DZ08_38	810	2.32759		0.0583	0.0022	0.605	0.028	0.0748	0.0038	0.76437	480.4	8.86	465	11.4	554.6	36.6		463.7	11.4	479.97	8.94	4.7
DZ08_6	455	1.87243		0.0596	0.0035	0.624	0.032	0.0775	0.0046	0.57981	492.4	10	481.2	13.8	544.6	56		480.2	13.7	490.58	9.89	3.2
DZ08_120	356	1.06907		0.0574	0.0029	0.641	0.04	0.0787	0.004	0.5965	502.9	12.4	488.4	12	569.8	56.5		487.1	11.9	494.9	11	3.7
DZ08_89	1282	0.867976		0.0559	0.0029	0.631	0.044	0.0807	0.0051	0.80119	496.7	13.7	500.3	15.2	480.2	46.8		500.6	15.2	497.6	13.5	-0.97
DZ08_55	1187	2.33202		0.0573	0.0027	0.633	0.032	0.0788	0.0044	0.73498	497.96	9.95	489	13.1	539.6	42.7		488.2	13.1	497.62	9.99	2.6
DZ08_93	783	4.14286		0.0614	0.003	0.661	0.04	0.0788	0.0038	0.62025	515.2	12.2	489	11.4	633.5	52.4		486.7	11.3	499	10.7	6.5
DZ08_1	560	2.69231		0.057	0.0033	0.643	0.038	0.0795	0.0044	0.72612	504.2	11.7	493.1	13.1	554.5	46.4		492.2	13.1	500.8	11.5	2.9
DZ08_4	231	7.12963		0.0576	0.0028	0.667	0.05	0.0807	0.0051	0.75153	518.9	15.2	500.3	15.2	601.6	54		498.7	15.2	509.2	14.5	4.6
DZ08_72	65.4	1.15957		0.0605	0.0044	0.676	0.046	0.0811	0.0039	0.3871	524.4	13.9	502.7	11.6	619.9	71.6		500.8	11.6	510.2	10.6	5.3
DZ08_3	518	3.53102		0.0574	0.0035	0.666	0.038	0.0827	0.005	0.67609	518.3	11.6	512.2	14.9	545.1	51.8		511.7	14.9	517.4	11.5	1.6
DZ08_97	1217	1.84954		0.0693	0.0034	0.734	0.045	0.0788	0.0044	0.72182	558.9	13.2	489	13.1	855	45.7		482.7	13	518.5	13	17
DZ08_14	103.1	1.18642		0.0566	0.0033	0.677	0.048	0.0829	0.0052	0.73351	525	14.5	513.4	15.5	575.5	53.7		512.4	15.4	520.4	14.1	2.9
DZ08_113	2000	2.08986		0.0588	0.0031	0.674	0.038	0.0833	0.0049	0.59883	523.1	11.5	515.8	14.6	555.4	56.3		515.1	14.6	521.5	11.3	1.9
DZ08_91	87.9	1.5781		0.0586	0.0039	0.687	0.055	0.0833	0.0051	0.55175	531	16.6	515.8	15.2	596.9	74.6		514.4	15.1	521.8	14	3.6
DZ08_31	259	1.81119		0.0586	0.0028	0.678	0.035	0.0838	0.0044	0.64217	525.6	10.6	518.8	13.1	555.2	48		518.2	13.1	524.1	10.4	1.8
DZ08_111	737	2.08192		0.0621	0.0043	0.7	0.045	0.0822	0.0048	0.42489	538.8	13.4	509.2	14.3	665.9	70.6		506.6	14.2	525.3	11.8	7.2
DZ08_54	939	1.18411		0.057	0.0031	0.697	0.033	0.0847	0.0047	0.16279	537	9.87	524.1	14	592.1	72.4		523	13.9	533.07	8.68	3.2
DZ08_102	524	2.36036		0.0596	0.0031	0.689	0.041	0.0875	0.0053	0.71552	532.2	12.3	540.7	15.7	495.8	49.9		541.5	15.7	533.1	12.2	-2.3
DZ08_34	991	2.96707		0.0583	0.0024	0.646	0.036	0.0792	0.0041	0.98186	506	11.1	491.3	12.2	572.9	11.9		490.1	12.2	534.2	10.7	8.9
DZ08_107	364	1.24232		0.064	0.0033	0.701	0.043	0.0821	0.0052	0.76984	539.4	12.8	508.6	15.5	671.6	45.3		505.9	15.4	535.3	13.1	8.2
DZ08_33	173.2	2.22622		0.0585	0.0029	0.707	0.043	0.0866	0.0044	0.69565	543	12.8	535.4	13.1	574.9	48.4		534.7	13	539.4	12	1.8
DZ08_22	1497	2.9585		0.0623	0.0028	0.704	0.045	0.0836	0.0062	0.76061	541.2	13.4	517.6	18.4	641.9	52.4		515.5	18.4	542.5	13.5	6.7
DZ08_26	207	1.55639		0.0558	0.003	0.706	0.052	0.089	0.0062	0.79359	542.4	15.5	549.6	18.4	512	50.8		550.3	18.4	543.2	15.3	-1.9
DZ08_73	560	0.699126		0.0561	0.0022	0.715	0.038	0.0919	0.0051	0.7477	547.7	11.2	566.8	15.1	469.2	42.8		568.5	15.1	547.6	11.1	-5.1
DZ08_49	717	1.10648		0.0596	0.0026	0.73	0.032	0.0857	0.004	0.52861	556.55	9.39	530.1	11.9	666.5	47.1		527.7	11.8	549.37	9.09	6.6
DZ08_67	342	0.693712		0.0602	0.0036	0.746	0.044	0.0875	0.0049	0.50274	565.9	12.8	540.7	14.5	668.4	61.4		538.4	14.5	556.2	11.9	6
DZ08_64	83	1.2064		0.0655	0.0046	0.813	0.072	0.0885	0.0043	0.33596	604.1	20.2	546.7	12.7	826.1	89.2		541.3	12.6	556.4	12.3	13
DZ08_83	245	1.07456		0.0581	0.0029	0.742	0.045	0.091	0.0043	0.64045	563.6	13.1	561.4	12.7	572.2	51.5		561.3	12.7	562.4	11.7	0.48
DZ08_117	547	1.82943		0.0604	0.0031	0.739	0.038	0.0895	0.0061	0.67558	561.8	11.1	552.6	18	599.4	54.7		551.7	18	562.4	11.1	2.5
DZ08_60	1334	1.76689		0.0684	0.005	0.865	0.075	0.0877	0.0062	0.64322	632.8	20.4	541.9	18.4	972.7	69.4		533.3	18.1	566.6	18.5	20
DZ08_41	1121	1.06357		0.059	0.0027	0.771	0.067	0.0945	0.0081	0.99513	580.3	19.2	582.1	23.9	573.46	9.35		582.3	23.9	574.43	9.02	-1.4
DZ08_95	779	3.46222		0.0601	0.003	0.758	0.049	0.0949	0.0061	0.68542	572.9	14.2	584.5	18	527.1	56		585.5	18	574.5	13.9	-2.8
DZ08_2	140.6	1.08404		0.0651	0.0044	0.816	0.056	0.0911	0.005	0.5296	605.8	15.7	562	14.8	773.2	64.3		557.9	14.7	580.1	13.6	9.6
DZ08_35	845	1.03554		0.0615	0.0026	0.737	0.043	0.0866	0.0054	0.94192	560.7	12.6	535.4	16	664.5	22.4		533.1	16	584.4	11.4	9.9
DZ08_92	319	1.64433		0.064	0.003	0.82	0.036	0.0931	0.0043	0.50841	608	10	573.8	12.7	737.6	47.3		570.6	12.6	598.34	9.69	7.8
DZ08_16	162.4	2.05051		0.0591	0.0034	0.803	0.043	0.0989	0.0054	0.51411	598.5	12.1	608	15.8	562.9	58.1		608.9	15.9	600.8	11.6	-2.1
DZ08_51	933	0.826395		0.0602	0.0023	0.736	0.043	0.086	0.0054	0.97365	560.1	12.6	531.8	16	676.5	15.6		529.3	16	609.18	9.01	15
DZ08_43	143.1	0.485085		0.0602	0.0027	0.866	0.045	0.1036	0.0049	0.44548	633.4	12.2	635.5	14.3	626	56.5		635.7	14.3	634.1	11.1	-0.44
DZ08_29	2740	2.36207		0.0681	0.0035	0.995	0.064	0.1039	0.006	0.79548	701.3	16.3	637.2	17.5	912.3	40.7		630.8	17.4	676	17.1	13
DZ08_10	330	2.10191		0.0642	0.0041	1.002	0.092	0.1126	0.0084	0.86016	704.8	23.3	687.8	24.3	759.4	49.6		686.1	24.3	698.4	23.5	3.3
DZ08_36	141.6	2.45407		0.0657	0.0029	1.038	0.056	0.1141	0.0045	0.65948	722.9	14	696.5	13	805.7	42.6		693.8	13	706.4	12.5	4.9
DZ08_61	177	0.434889		0.0651	0.0034	1.165	0.065	0.1307	0.0083	0.34295	784.3	15.2	791.9	23.7	762.9	72.4		792.7	23.7	785.8	14.5	-1.4
DZ08_13	252	1.01613		0.0654	0.0043	1.203	0.084	0.1358	0.0094	0.67565	802	19.4	820.9	26.7	749.8	59.1		823	26.7	803.2	19.2	-3.4
DZ08_119	142.1	1.3431		0.0702	0.0039	1.358	0.095	0.1356	0.0063	0.62551	871	20.5	819.7	17.9	1003.8	55.5		813.8	17.8	834.1	17.6	8.5
DZ08_118	240	1.10599		0.0702	0.0037	1.358	0.087	0.1391	0.0059	0.56651	871	18.7	839.6	16.7	951.8	54.4		835.9	16.6	850.5	15.8	5.1
DZ08_103	935	2.10586		0.0764	0.0037	1.44	0.092	0.1384	0.0073	0.61629	905.7	19.1	835.6	20.7	1080.8	52.2		827.3	20.5	874.6	18.7	11
DZ08_50	311	0.749398		0.0692	0.0025	1.415	0.087	0.1451	0.0089	0.76952	895.3	18.3	873.4	25.1	949.5	42.7		870.8	25	896.7	18.4	3.8
DZ08_81	229	0.522831		0.0708	0.004	1.474	0.098	0.154	0.012	0.74417	919.8	20.1	923.3	33.5	911.2	54.3		923.8	33.5	919.1	19.6	-0.63
DZ08_85	169.9	1.27171		0.0706	0.0043	1.718	0.09	0.1717	0.0086	0.38323	1015.3	16.8	1021.5	23.7	1001.9	57.8		1022.3	23.7	1016.8	15.8	-0.88
DZ08_88	418	1.29814		0.0738	0.0044	1.78	0.13	0.178	0.011	0.79477	1038.2	23.7	1056	30.1	1000.8	45.2		1058.5	30.2	1037.9	23.5	-2.6
DZ08_23	74.2	1.18153		0.0805	0.0049	1.96	0.13	0.173	0.011	0.70013	1101.9	22.3	1028.6	30.2	1249.6	49.3		1018.4	29.9	1096.6	23.1	10
DZ08_98	520	1.7931		0.0791	0.004	2.03	0.11	0.1891	0.0099	0.53996	1125.6	18.4	1116.5	26.8	1143.3	50.8		1143.3	50.8	1124.3	18.2	1.2
DZ08_86	551	1.02799		0.1004	0.0063	3.5	0.22	0.253	0.016	0.604	1527.2	24.8	1453.9	41.2	1630.3	52.1		1630.3	52.1	1526.8	25.3	7.8
DZ08_20	2100	0.976744		0.0979	0.0055	3.24	0.29	0.238	0.02	0.99861	1466.8	34.7	1376.3	52.1	1600.35	6.65		1600.35	6.65	1618.61	3.89	18
DZ08_87	590	4.32551		0.115	0.0063	4.31	0.36	0.273	0.021	0.75137	1695.3	34.4	1556	53.2	1872.1	51.3		1872.1	51.3	1715.8	35.3	14
DZ08_53	199	0.780392		0.1179	0.0052	5.95	0.35	0.362	0.022	0.7892	1968.6	25.6	1991.6	52.1	1944.4	34.8		1944.4	34.8	1961.3	23.1	-2
DZ08_114	299	0.782723		0.1258	0.0079	6.65	0.39	0.377	0.017	0.39299	2066	25.9	2062.3	39.8	2069.7	51.3		2069.7	51.3	2065.3	25	0.31
DZ08_44	1396	10.8469		0.1487	0.0069	7.26	0.34	0.35	0.017	0.70627	2143.9	20.9	1934.6	40.6	2350.9	31.3		2350.9	31.3	2182.2	20.2	17	high U/Th
DZ08_68	734	0.669098		0.1577	0.0078	8.59	0.47	0.393	0.02	0.6957	2295.5	24.9	2136.7	46.3	2440	35		2440	35	2320.2	24.6	12
DZ08_24	635	9.84496		0.16	0.01	9.4	0.65	0.42	0.023	0.94137	2377.8	31.7	2260.5	52.2	2480	21.5		2480	21.5	2482.4	19.7	11
DZ08_12	397	2.50158		0.1589	0.009	10.56	0.85	0.469	0.036	0.59902	2485.2	37.3	2479.2	79	2490.1	59.4		2490.1	59.4	2485.7	36.9	0.41
DZ08_65	294	0.566474		0.1652	0.008	10.79	0.61	0.474	0.029	0.77281	2505.2	26.3	2501.1	63.4	2508.6	33.6		2508.6	33.6	2506.4	22.9	0.29
MVDZ08, discordant analyses (excluded from plots and interpretation)
DZ08_71	4350	0.659091		0.0697	0.0037	0.696	0.052	0.0711	0.0056	0.84204	536	30	442	34	890	120		434.6	16.6	500.4	17.9	25
DZ08_45	1230	25.8403		0.1086	0.0049	3.07	0.22	0.208	0.016	0.81414	1421	47	1210	85	1758	82		1758	82	1491.2	26.8	26
DZ08_57	710	1.05185		0.062	0.0034	0.762	0.056	0.0854	0.0053	0.97775	568	32	527	31	620	120		524	15.6	427.7	18.6	27
DZ08_69	369	1.46197		0.0652	0.0052	0.314	0.027	0.034	0.0019	0.51738	278	21	216	12	700	170		211.12	5.8	216.33	5.98	28
DZ08_84	133.5	1.27385		0.0669	0.0073	0.407	0.042	0.0428	0.0024	0.27651	346	29	270	15	770	210		264.4	7.26	276.96	7.33	29
DZ08_47	1173	1.63598		0.1579	0.0056	7.25	0.4	0.323	0.02	0.90563	2146	45	1815	92	2437	62		2437	62	2338.5	14.4	31
DZ08_21	137	1.12572		0.0669	0.0043	0.821	0.064	0.0876	0.0076	0.99059	600	36	539	45	810	140		535.1	22.3	769.6	6.68	37
DZ08_59	740	3.07054		0.0797	0.0075	0.118	0.016	0.0119	0.0021	0.89879	112	14	76	13	1050	180		73.92	6.49	74.05	7.16	42
DZ08_39	2710	0.537698		0.0773	0.006	0.0283	0.0022	0.00274	0.00018	0.59156	28.3	2.2	17.6	1.1	1080	160		17	0.56	17.08	0.58	48
DZ08_75	16240	0.344798		0.0741	0.0043	0.025	0.002	0.00235	0.00014	0.82883	25.1	2	15.12	0.91	1020	110		14.54	0.43	11.39	0.37	59
DZ08_110	1470	0.720588		0.091	0.011	0.0257	0.0037	0.00215	0.00017	0.50014	25.7	3.7	13.8	1.1	1270	250		13.14	0.52	12.93	0.53	63
DZ08_7	15400	0.427778		0.0777	0.0068	0.0277	0.0047	0.00226	0.00022	0.71993	27.6	4.5	14.5	1.4	1050	170		13.77	0.67	12	0.61	68
DZ08_27	5840	2.44351		0.118	0.018	0.055	0.011	0.00327	0.00036	0.51981	53	10	21	2.3	1630	310		19.04	1.05	18.36	1.09	98
DZ08_108	1320	2.14286		0.1566	0.0086	4.13	0.36	0.194	0.015	0.83632	1642	67	1137	81	2395	95		1041.7	37.2	708.6	44.7	100
DZ08_17	2540	0.846667		0.13	0.015	0.0456	0.0081	0.00248	0.00017	0.91823	45	7.5	16	1.1	1960	170		14.21	0.49	11.88	0.25	110
DZ08_37	1393	1.09858		0.185	0.044	4.4	1.6	0.156	0.015	0.95873	1400	200	926	84	2330	390		786.2	35.6	770.6	13.7	120
DZ08_9	164	1.44239		0.283	0.052	2.19	0.5	0.0499	0.0041	0.77983	1050	180	313	25	2720	470		240.19	9.69	240.54	8.39	190
DZ08_46	33	0.305556		0.676	0.035	19	1.9	0.193	0.019	0.82943	2997	98	1125	99	4672	84		206.8	10	270.8	35.6	300
DZ08_40	401	1.09863		0.0643	0.0031	1.352	0.075	0.152	0.01	0.98994	871	29	908	58	764	95		917.4	28.1	811.18	5.85	-13
DZ08_63	249	0.96139		0.0544	0.0031	0.693	0.04	0.0932	0.0053	0.51314	534	25	573	31	370	120		578.1	15.7	543.9	11.3	-9.8
DZ08_77	274	1.12295		0.0559	0.0031	0.701	0.046	0.0895	0.0063	0.94699	534	27	551	37	380	110		553.8	18.7	525.7	11.6	-5.5
MVDZ07, Pakabulake Fm, Fluvial
DZ07_62	729	1.31		0.052	0.0024	0.064	0.003	0.00878	0.00029	0.079573	62.99	1.43	56.35	0.93	323.1	62.6		55.95	0.92	58.19	0.81	12
DZ07_71	1150	1.4		0.0531	0.0033	0.269	0.019	0.0362	0.0022	0.60745	241.89	7.6	229.24	6.84	366.6	66.4		228.34	6.82	233.77	6.47	6.2
DZ07_96	574	1.359		0.0565	0.0031	0.312	0.011	0.0403	0.0017	-0.019243	275.73	4.26	254.69	5.27	458.3	61.5		253.17	5.24	267.3	3.3	9.8
DZ07_8	132.1	1.72		0.0553	0.0031	0.318	0.023	0.0437	0.0027	0.59987	280.36	8.86	275.73	8.34	319.2	69		275.39	8.33	277.68	7.69	2
DZ07_44	704	1.428		0.0514	0.003	0.3141	0.0097	0.0445	0.0015	-0.18203	277.35	3.75	280.67	4.63	249.5	57.2		280.91	4.63	278.72	2.64	-1.5
DZ07_85	482	1.32		0.0612	0.0038	0.342	0.014	0.0411	0.0022	0.16867	298.69	5.3	259.65	6.81	616.2	66.6		256.79	6.74	284.61	4.56	18
DZ07_20	848	1.366		0.0533	0.0025	0.329	0.011	0.0446	0.0016	0.22066	288.8	4.2	281.28	4.94	350.1	48.9		280.73	4.93	285.8	3.54	3.3
DZ07_114	688	1.24		0.0555	0.0031	0.373	0.018	0.0499	0.0018	0.37971	321.87	6.66	313.91	5.53	379.9	54		313.31	5.52	316.69	4.98	2.9
DZ07_34	299	1.476		0.0592	0.0027	0.397	0.02	0.0495	0.0021	0.50206	339.47	7.27	311.45	6.45	536.1	51.2		309.32	6.41	321.68	5.97	10
DZ07_45	477	1.78		0.0555	0.003	0.38	0.016	0.051	0.0018	0.19864	327.04	5.89	320.66	5.52	372.7	55.5		320.18	5.51	323.58	4.42	2.4
DZ07_88	144	1.94		0.0611	0.0034	0.435	0.027	0.0509	0.0026	0.43801	366.72	9.55	320.04	7.97	673.5	64.9		316.44	7.89	334.94	7.45	16
DZ07_106	81.7	1.97		0.0665	0.0026	0.505	0.025	0.0561	0.0021	0.52398	415.08	8.43	351.86	6.41	783.6	45.9		346.82	6.32	363.89	6.34	20
DZ07_83	280	1.178		0.0638	0.0046	0.581	0.061	0.0668	0.0035	0.92737	465.1	19.6	416.8	10.6	711	63.5		412.8	10.5	382.73	7.06	17
DZ07_27	297	1.89		0.0587	0.0022	0.504	0.019	0.0618	0.0017	0.15849	414.41	6.41	386.56	5.16	572.6	46.8		384.32	5.13	396.73	4.36	8.4
DZ07_69	523	1.54		0.0541	0.0023	0.488	0.023	0.065	0.0021	0.45473	403.55	7.85	405.96	6.36	389.7	48.7		406.16	6.36	405.2	5.9	-0.72
DZ07_59	494	1.014		0.0531	0.0024	0.503	0.016	0.0681	0.0028	0.3038	413.73	5.4	424.7	8.45	353	49.3		425.59	8.47	416.02	5.08	-3.5
DZ07_66	285	2.44		0.0536	0.0028	0.507	0.029	0.0672	0.0027	0.31846	416.43	9.77	419.26	8.15	400.8	65.5		419.5	8.16	418.21	7.15	-0.82
DZ07_17	429	2.26		0.0576	0.0025	0.528	0.024	0.0667	0.0024	0.48583	430.48	7.97	416.24	7.25	507.4	46.3		415.08	7.23	421.95	6.57	4.1
DZ07_73	204	0.693		0.0584	0.0026	0.54	0.027	0.0666	0.0028	0.53477	438.42	8.9	415.64	8.46	559.9	49		413.76	8.42	425.49	7.69	6.6
DZ07_13	110.5	0.959		0.0647	0.0046	0.634	0.058	0.0686	0.0025	0.27265	498.6	18	427.72	7.54	838.7	92.4		421.68	7.44	431.33	7.52	19
DZ07_87	647	1.3		0.0568	0.0024	0.536	0.019	0.0685	0.0024	0.023009	435.78	6.28	427.11	7.24	481.9	54.4		426.4	7.23	432.06	4.81	2.5
DZ07_10	169.3	1.457		0.0596	0.0032	0.563	0.024	0.0675	0.0027	0.13414	453.48	7.8	421.08	8.15	621.2	58.7		418.38	8.1	437.85	6.07	9.3
DZ07_46	59	2.5		0.0573	0.0031	0.556	0.033	0.0709	0.0037	0.60108	448.9	10.8	441.6	11.1	486.7	55.4		441	11.1	445.52	9.84	2.1
DZ07_80	167	1.543		0.0594	0.0023	0.59	0.027	0.0714	0.0019	0.44604	470.87	8.62	444.58	5.72	601.1	44.8		442.36	5.69	448.72	5.6	7
DZ07_22	261	1.307		0.0588	0.0033	0.593	0.029	0.073	0.003	0.41269	472.78	9.24	454.2	9.01	564	53.6		452.63	8.98	462.94	7.73	5
DZ07_30	87.8	0.789		0.059	0.0025	0.593	0.026	0.0728	0.0029	0.53354	472.78	8.29	453	8.71	570	44.1		451.33	8.68	463.76	7.51	5.4
DZ07_94	203.5	1.29		0.0597	0.0027	0.591	0.026	0.0735	0.0027	0.31922	471.51	8.3	457.21	8.11	541.7	51.9		455.99	8.09	464.04	6.7	3.8
DZ07_112	382	0.578		0.0581	0.0028	0.586	0.028	0.0744	0.003	0.34229	468.31	8.96	462.61	9	496.3	56.1		462.13	8.99	465.47	7.38	1.5
DZ07_110	285	1.025		0.0634	0.0047	0.623	0.04	0.0734	0.0033	0.19638	491.7	12.5	456.61	9.91	658.8	75.9		453.6	9.85	468.8	8.57	9.1
DZ07_109	255	0.974		0.065	0.0032	0.665	0.034	0.0735	0.0028	0.029986	517.7	10.4	457.21	8.41	794.3	65.9		451.96	8.31	480.1	6.75	15
DZ07_51	249	1.58		0.0622	0.0029	0.635	0.029	0.0733	0.0033	0.56244	499.21	9	456.01	9.91	702.5	45.2		452.29	9.83	481.37	8.52	12
DZ07_74	162	2.41		0.0595	0.0031	0.634	0.031	0.076	0.0028	0.20508	498.58	9.63	472.2	8.39	621.6	59.2		469.92	8.35	482.9	7	6.8
DZ07_105	306	1.51		0.068	0.0033	0.676	0.028	0.0742	0.0034	0.53335	524.35	8.48	461.4	10.2	808.8	44.3		455.9	10.1	503.47	8.27	17
DZ07_120	417	0.551		0.0603	0.0028	0.744	0.043	0.092	0.0052	0.72505	564.7	12.5	567.4	15.3	554.2	46.3		567.6	15.4	565.1	12.4	-0.65
DZ07_52	187	1.646		0.0613	0.0027	0.809	0.043	0.0979	0.0049	0.45187	601.9	12.1	602.1	14.4	601.1	58.5		602.1	14.4	602	11.1	-0.044
DZ07_47	93.8	2.45		0.0599	0.0026	0.825	0.034	0.0969	0.0038	0.41318	610.83	9.46	596.2	11.2	665.4	46.7		594.8	11.1	605.49	8.59	3.2
DZ07_63	240	0.461		0.0677	0.0033	1.007	0.044	0.1066	0.0042	0.23688	707.4	11.1	653	12.2	884.1	53.2		647.5	12.1	682.69	9.34	11
DZ07_3	491	1.74		0.0671	0.0035	1.098	0.055	0.1171	0.0039	0.20073	752.4	13.3	713.9	11.3	868.7	56.3		709.8	11.2	728.65	9.53	7
DZ07_91	237	1.25		0.0679	0.0029	1.094	0.043	0.1176	0.0048	0.50649	750.4	10.4	716.7	13.8	852.3	41.4		713.2	13.8	742.4	10.2	6.4
DZ07_4	424	1.727		0.07	0.0042	1.16	0.063	0.121	0.0053	0.18086	782	14.8	736.3	15.2	914.5	65.1		731.4	15.1	759.4	11.7	8.1
DZ07_25	504	1.46		0.0696	0.0041	1.183	0.058	0.1203	0.0048	0.075852	792.7	13.5	732.3	13.8	966.6	62.1		725.7	13.7	762.4	10.2	11
DZ07_14	490	0.714		0.0653	0.0028	1.135	0.092	0.1229	0.0088	0.81334	770.1	21.9	747.2	25.3	837.1	49.5		744.8	25.2	766.7	22.3	4.3
DZ07_53	140	1.228		0.0648	0.0027	1.136	0.04	0.1291	0.0068	0.57409	770.61	9.51	782.7	19.4	735.6	46		784.1	19.4	769.87	9.45	-2.4
DZ07_33	708	1.156		0.0723	0.0037	1.179	0.056	0.1211	0.0057	0.35676	790.8	13	736.9	16.4	946.2	54.9		731	16.3	772.4	12.1	9.7
DZ07_15	289	0.886		0.0643	0.0031	1.142	0.053	0.1273	0.0053	0.20934	773.5	12.6	772.4	15.2	776.4	58.3		772.3	15.2	773.1	10.6	0.18
DZ07_101	124.7	0.63		0.0684	0.0028	1.154	0.04	0.1239	0.0046	0.44397	779.13	9.43	753	13.2	854.8	39.4		750.1	13.1	773.21	9.11	4.8
DZ07_43	29.7	1.6		0.0654	0.0034	1.146	0.063	0.1292	0.0081	0.55813	775.4	14.9	783.3	23.1	752.5	58.8		784.2	23.1	776	14.8	-1.5
DZ07_1	244	0.967		0.0797	0.006	1.39	0.13	0.1273	0.0065	0.54107	884.7	27.6	772.4	18.6	1177	77.8		759.5	18.3	779	19	20
DZ07_95	191	0.535		0.0664	0.0026	1.17	0.05	0.1293	0.005	0.42943	786.6	11.7	783.9	14.3	794.5	45.7		783.6	14.3	785.7	10.8	0.49
DZ07_100	188	0.967		0.0687	0.003	1.193	0.047	0.1312	0.005	0.4471	797.4	10.9	794.7	14.2	804.7	42.7		794.4	14.2	796.6	10.3	0.46
DZ07_118	43	0.336		0.0746	0.0027	1.241	0.062	0.117	0.0063	0.65348	819.3	14	713.3	18.2	1119.3	43.2		701.7	17.9	798.9	14.8	20
DZ07_23	468	1.25		0.0632	0.0026	1.186	0.065	0.134	0.0063	0.35598	794.1	15.1	810.6	17.9	748	61.4		812.5	17.9	800.1	13.3	-2.8
DZ07_92	53.9	0.576		0.0806	0.0043	1.376	0.094	0.1266	0.0054	0.073153	878.7	20.1	768.4	15.4	1167.8	77.1		755.8	15.2	805.1	13.1	18
DZ07_93	83.3	0.556		0.0703	0.0027	1.216	0.048	0.1289	0.0055	0.64368	807.9	11	781.6	15.7	881.3	36		778.7	15.6	806	11.1	4.9
DZ07_111	821	1.42		0.0703	0.0034	1.219	0.036	0.125	0.007	0.5194	809.32	8.24	759.3	20.1	949.6	49		753.7	19.9	812.28	8.19	9.8
DZ07_102	237	1.21		0.0736	0.0034	1.313	0.056	0.1299	0.0059	0.43959	851.4	12.3	787.3	16.8	1022.5	47.2		780	16.7	835.2	12	11
DZ07_97	285	1.193		0.0686	0.0029	1.298	0.049	0.1378	0.0052	0.45986	844.8	10.8	832.2	14.7	878.2	40.6		830.8	14.7	841.8	10.4	2.1
DZ07_78	234	1.31		0.0671	0.0031	1.303	0.068	0.1399	0.0056	0.6334	847	15	844.1	15.8	854.8	42.6		843.8	15.8	845.8	13.9	0.48
DZ07_35	351	2.59		0.0633	0.0027	1.32	0.088	0.1435	0.0083	0.69794	854.5	19.3	864.4	23.4	828.9	51.2		865.6	23.4	856.4	18.8	-1.7
DZ07_32	1139	1.75		0.0673	0.0038	1.343	0.062	0.1421	0.0067	0.28564	864.5	13.4	856.5	18.9	885.1	57.6		855.6	18.9	862.3	12.3	1.3
DZ07_70	211	2.69		0.0678	0.0034	1.336	0.047	0.1451	0.0062	0.27687	861.5	10.2	873.4	17.5	830.9	49.2		874.8	17.5	863.59	9.7	-2
DZ07_89	87	1.39		0.0692	0.0038	1.381	0.059	0.1418	0.0072	0.17807	880.9	12.6	854.8	20.3	946.9	61.7		851.8	20.3	874.7	11.6	4.3
DZ07_41	160	1.98		0.0685	0.002	1.44	0.045	0.1516	0.005	0.56867	905.72	9.36	909.9	14	895.5	30.8		910.4	14	906.13	9.28	-0.68
DZ07_115	204.1	0.866		0.0683	0.0035	1.448	0.055	0.1528	0.0068	0.153	909	11.4	916.6	19	890.6	55.7		917.6	19	910.8	10.4	-1.2
DZ07_79	349	1.83		0.0661	0.0029	1.476	0.077	0.1569	0.0079	0.59431	920.6	15.8	939.5	22	875.5	47.8		941.9	22.1	923	15.5	-3
DZ07_107	300	0.897		0.0706	0.0031	1.488	0.057	0.1537	0.0072	0.44951	925.5	11.6	921.7	20.1	934.6	46.4		921.2	20.1	925.1	11.5	0.61
DZ07_42	358	1.43		0.0705	0.0023	1.529	0.076	0.1584	0.0085	0.69589	942.1	15.3	947.9	23.7	928.6	41.5		948.6	23.7	941.7	15.2	-0.95
DZ07_28	235	0.79		0.0719	0.0035	1.559	0.065	0.1559	0.0061	0.25598	954.1	12.9	934	17	1000.8	50.1		931.4	17	947.5	11.5	3
DZ07_39	307	1.32		0.0696	0.0033	1.55	0.084	0.1577	0.0073	0.53246	950.5	16.7	944	20.3	965.6	50.1		943.2	20.3	948.5	15.9	0.98
DZ07_67	252	1.31		0.0694	0.0032	1.571	0.058	0.1617	0.0056	0.27444	958.8	11.5	966.2	15.5	941.9	44.2		967.2	15.6	961	10.3	-1.1
DZ07_77	81	1.76		0.0688	0.0024	1.583	0.071	0.1612	0.0069	0.66615	963.5	14	963.4	19.2	963.8	36.6		963.4	19.2	963.5	13.9	0.017
DZ07_65	158.5	1.228		0.0713	0.0031	1.588	0.057	0.1633	0.0048	0.21275	965.5	11.2	975.1	13.3	943.8	42.3		976.3	13.3	969.24	9.37	-1.4
DZ07_104	184	1.495		0.0715	0.0034	1.616	0.077	0.1644	0.0096	0.62901	976.4	14.9	981.2	26.6	965.8	47.7		981.8	26.6	976.1	14.9	-0.75
DZ07_29	658	1.87		0.0772	0.0032	1.682	0.066	0.1575	0.0054	0.25249	1001.7	12.5	942.9	15	1132.9	44.9		935.3	14.9	978.6	11	8.6
DZ07_98	360	0.755		0.0742	0.0038	1.67	0.061	0.1681	0.0086	0.25103	997.2	11.6	1001.6	23.7	987.4	55.8		1002.2	23.7	997.7	11.3	-0.66
DZ07_75	70.7	0.558		0.0754	0.0038	1.723	0.068	0.1722	0.0077	0.33252	1017.1	12.7	1024.2	21.2	1001.9	49.6		1025.2	21.2	1018.3	12.2	-1
DZ07_68	226	1.501		0.0706	0.0029	1.737	0.06	0.1786	0.0072	0.48438	1022.4	11.1	1059.3	19.7	944	39.3		1064.3	19.8	1024.4	11	-5.4
DZ07_49	119.9	1.685		0.0819	0.0054	1.93	0.12	0.1724	0.0082	0.52535	1091.5	20.8	1025.3	22.5	1226.1	54		1016.1	22.4	1061.9	19.5	9.1
DZ07_2	176	0.554		0.081	0.0041	2.165	0.087	0.1926	0.0093	0.34772	1169.9	14	1135.4	25.1	1234.2	50		1234.2	50	1165.5	13.7	4.5
DZ07_26	560	3.45		0.097	0.01	2.27	0.28	0.182	0.021	0.68652	1203	43.5	1077.9	57.3	1435.2	90.4		1435.2	90.4	1185.2	46.6	17
DZ07_38	356	1.68		0.0949	0.0071	2.66	0.18	0.2066	0.009	0.18763	1317.4	25	1210.7	24	1495.6	69.3		1495.6	69.3	1258.1	19.6	13
DZ07_84	203	1.34		0.0843	0.0027	2.9	0.13	0.247	0.01	0.52838	1381.9	16.9	1423	25.8	1319	40.3		1319	40.3	1386.3	16.5	-4.5
DZ07_21	309.9	0.654		0.0985	0.0055	3.42	0.19	0.2467	0.0092	0.3547	1509	21.8	1421.4	23.8	1634.2	50.9		1634.2	50.9	1468.4	19.4	9.5
DZ07_103	165	0.812		0.0963	0.0031	3.43	0.27	0.266	0.018	0.90348	1511.3	30.9	1520.5	45.8	1498.5	32.1		1498.5	32.1	1505.3	27.4	-1.2
DZ07_7	277	1.271		0.099	0.0046	3.48	0.13	0.2621	0.0074	0.30915	1522.7	14.7	1500.6	18.9	1553.6	36.8		1553.6	36.8	1515.4	13.3	2.3
DZ07_64	108	0.825		0.1082	0.0043	4.06	0.16	0.282	0.011	0.30787	1646.3	16.1	1601.4	27.7	1704.1	42.5		1704.1	42.5	1638.8	15.6	4.4
DZ07_82	105.8	0.932		0.1097	0.0057	4.27	0.22	0.284	0.012	0.30305	1687.6	21.2	1611.5	30.1	1783.5	50.9		1783.5	50.9	1666.4	20	7.4
DZ07_90	362	3.15		0.1109	0.0057	4.66	0.19	0.31	0.013	0.28243	1760.1	17	1740.7	32	1783.2	45.2		1783.2	45.2	1757.4	16.6	1.8
DZ07_116	72.2	0.808		0.1055	0.0047	4.75	0.22	0.326	0.013	0.55505	1776.1	19.4	1819	31.6	1726.1	37.7		1726.1	37.7	1778.2	19.2	-3.9
DZ07_12	79.7	1.19		0.1111	0.0057	4.98	0.25	0.318	0.016	0.51823	1815.9	21.2	1780	39.1	1857.5	44.6		1857.5	44.6	1815.2	21.4	3.2
DZ07_50	579	4.27		0.1494	0.0077	7.02	0.49	0.342	0.025	0.66276	2114	31	1896.3	60	2333	50.3		2333	50.3	2141.3	30.9	18
DZ07_37	492	1.85		0.1407	0.0081	7.45	0.41	0.377	0.018	0.44097	2167	24.6	2062.3	42.1	2267.7	47.1		2267.7	47.1	2155.1	25	8.3
DZ07_58	256	1.65		0.1505	0.0061	8.27	0.29	0.385	0.014	0.40248	2261	15.9	2099.6	32.6	2410.5	33.2		2410.5	33.2	2251.5	16.3	12
DZ07_99	161	2.09		0.1488	0.0064	8.56	0.49	0.432	0.021	0.63667	2292.3	26	2314.7	47.3	2272.4	39.5		2272.4	39.5	2290.5	25.8	-1.6
DZ07_72	44.7	0.239		0.1552	0.0066	9.76	0.46	0.458	0.021	0.61282	2412.4	21.7	2430.7	46.4	2396.9	34.8		2396.9	34.8	2410.4	21.3	-1.3
DZ07_56	148.8	0.923		0.1578	0.0071	10.03	0.48	0.461	0.02	0.55071	2437.5	22.1	2444	44.1	2432.2	36.8		2432.2	36.8	2437.3	22	-0.45
DZ07_5	121.9	0.886		0.1628	0.0082	10.18	0.54	0.445	0.026	0.63208	2451.3	24.5	2373	58	2516.9	40.4		2516.9	40.4	2462	23.6	5.5
DZ07_6	116	1.79		0.16	0.0066	10.35	0.33	0.472	0.019	0.37103	2466.6	14.8	2492.3	41.6	2445.4	34.7		2445.4	34.7	2466.4	14.7	-1.8
DZ07_119	1040	3.8		0.1744	0.0093	10.2	1.3	0.433	0.052	0.88472	2453.1	58.9	2319	117	2566	50.1		2566	50.1	2523.9	42.6	10
MVDZ07, discordant analyses (excluded from plots and interpretation)
DZ07_61	261	1.1		0.1109	0.0069	3.56	0.32	0.235	0.026	0.81071	1534	69	1370	130	1820	120		1820	120	1605.5	30.9	21
DZ07_113	581	3.15		0.0761	0.0049	1.45	0.13	0.137	0.012	0.94742	900	56	825	70	1060	130		817.9	33.6	1002.4	23	21
DZ07_16	109.2	2.8		0.1531	0.0073	6.85	0.29	0.318	0.014	0.53682	2087	38	1778	66	2365	78		2365	78	2081.5	20.2	26
DZ07_86	118.6	1.192		0.074	0.0033	0.749	0.037	0.0737	0.0029	0.31503	571	20	458	18	1022	95		448.67	8.53	491.88	8.04	27
DZ07_40	273	1.253		0.0781	0.0062	0.75	0.061	0.0713	0.0049	0.50853	565	34	444	30	1110	140		433	14.4	474	14.6	31
DZ07_57	810	1.554		0.0684	0.0033	0.438	0.014	0.0454	0.0017	0.17292	368.5	9.7	286	11	894	98		279.9	5.13	328.63	4.01	31
DZ07_18	208	1.01		0.199	0.01	10	1.1	0.368	0.044	0.87563	2460	110	1990	210	2803	86		2803	86	2637.8	32.3	33
DZ07_9	734	1.041		0.0926	0.007	1.35	0.072	0.1047	0.0054	0.11204	864	31	642	31	1490	140		617.1	15.2	742.7	12.6	41
DZ07_11	900	2.37		0.156	0.01	5.2	1.1	0.266	0.058	0.9547	1770	200	1470	300	2410	110		2410	110	2157.4	37.8	41
DZ07_19	215	1.37		0.089	0.016	0.58	0.15	0.0464	0.0041	0.86365	459	94	292	25	1180	330		278.5	12	252.27	7.81	59
DZ07_31	234	1.09		0.181	0.032	4.1	0.79	0.1575	0.007	0.65603	1540	180	942	39	2320	380		845.3	17.6	862.6	16.1	100
DZ07_108	364	2.27		0.2246	0.0093	20.66	0.94	0.669	0.03	0.58888	3123	42	3300	110	3014	67		3014	67	3102.1	21.4	-9.8
DZ07_60	122.6	0.478		0.1104	0.0046	5.72	0.25	0.372	0.014	0.49259	1937	36	2036	65	1818	82		1818	82	1939.8	18.4	-8.6
DZ07_117	485	2.59		0.0544	0.0029	0.69	0.034	0.0919	0.0042	0.54056	531	20	567	25	360	110		569.8	12.5	542.46	9.52	-8.3
DZ07_48	112.4	0.999		0.0712	0.0038	1.975	0.089	0.1986	0.0058	0.29663	1104	31	1167	31	1000	110		1000	110	1135.1	12.1	-7.9
DZ07_55	129	1.216		0.147	0.0041	9.64	0.31	0.474	0.02	0.66756	2397	30	2495	86	2306	47		2306	47	2384.2	13.7	-7
DZ07_24	84	0.8		0.1506	0.006	10.26	0.39	0.486	0.015	0.25222	2454	36	2550	66	2357	76		2357	76	2472.2	16.5	-6.6
DZ07_54	117.9	1.321		0.1247	0.0052	7	0.3	0.406	0.018	0.52189	2121	38	2210	76	2025	69		2025	69	2107.9	18.9	-6.6
DZ07_81	84	2.6		0.0683	0.0032	1.665	0.066	0.1751	0.0069	0.52598	998	24	1039	38	872	92		1046.1	19	1000.5	12.2	-6.5
DZ07_36	93.4	1.225		0.1011	0.0039	4.27	0.21	0.312	0.012	0.66887	1711	42	1766	54	1650	78		1650	78	1688.4	19.8	-5.9
DZ07_76	354	2.5		0.0644	0.0033	1.386	0.075	0.1531	0.0092	0.59156	879	32	917	51	777	97		922.6	25.8	883.8	15.8	-5.9
MVDZ06, Wuqia Fm, Fluvial
DZ06_33	810	1.417		0.0526	0.0025	0.2286	0.0095	0.0336	0.0021	0.69089	209.04	3.93	213.04	6.55	164.2	52.8		213.32	6.56	208.63	3.89	-2.9
DZ06_79	498	1.286		0.0547	0.0034	0.268	0.013	0.03214	0.00099	-0.13735	241.09	5.21	203.93	3.09	620.7	65.7		201.33	3.05	214.32	2.51	19
DZ06_28	658	3.32		0.0555	0.0033	0.24	0.012	0.0334	0.0017	0.31911	218.42	4.91	211.79	5.3	290.5	67.3		211.33	5.29	215.46	4.15	3.7
DZ06_41	637	4.9		0.0511	0.0024	0.232	0.0088	0.0349	0.0013	0.41648	211.85	3.63	221.14	4.05	109.7	47.9		221.79	4.06	215.6	3.19	-5.2
DZ06_73	160	1.554		0.0502	0.0028	0.247	0.015	0.0345	0.0014	0.42956	224.14	6.11	218.65	4.36	282.1	64.9		218.27	4.35	219.88	4.17	2.8
DZ06_46	385	2.65		0.0512	0.002	0.253	0.013	0.0338	0.0017	0.70215	229.01	5.27	214.29	5.3	383	44.1		213.26	5.28	221.61	4.93	7.9
DZ06_37	502	1.48		0.0513	0.0023	0.241	0.015	0.0357	0.0016	0.69599	219.24	6.14	226.12	4.98	145.9	52.4		226.6	4.99	224.85	4.9	-3.4
DZ06_68	324	1.191		0.0515	0.0023	0.249	0.013	0.0352	0.002	0.56434	225.76	5.28	223.01	6.23	254.5	58.7		222.82	6.22	224.89	5	1.5
DZ06_66	562	2.17		0.0519	0.0023	0.253	0.011	0.0355	0.0016	0.55842	229.01	4.46	224.88	4.98	271.6	47.7		224.59	4.97	227.45	4.14	2.2
DZ06_9	124.4	1.327		0.0528	0.0028	0.245	0.014	0.0361	0.0011	0.38558	222.51	5.71	228.61	3.42	158.4	62.5		229.04	3.43	227.73	3.33	-3
DZ06_115	674	1.57		0.0531	0.0027	0.297	0.017	0.035	0.0017	0.59003	264.05	6.65	221.77	5.29	658.3	52		218.76	5.22	230.37	5.24	20
DZ06_61	930	2.78		0.0512	0.0023	0.254	0.015	0.0375	0.0018	0.63118	229.82	6.07	237.32	5.59	153.8	55.1		237.85	5.6	234.36	5.21	-3.7
DZ06_16	376	1.47		0.0622	0.0048	0.311	0.031	0.0365	0.0028	0.57413	275	12	231.1	8.71	667.1	89.8		227.96	8.59	236.72	8.71	20
DZ06_75	241.6	1.377		0.0585	0.0048	0.3	0.019	0.0358	0.0018	0.03394	266.4	7.42	226.75	5.6	631.3	85.6		223.92	5.53	240.56	4.6	19
DZ06_77	238	2.56		0.0527	0.0024	0.288	0.01	0.0372	0.0017	0.17045	256.98	3.94	235.45	5.28	458.3	58.2		233.92	5.25	249.8	3.43	11
DZ06_19	330	2.91		0.0515	0.0029	0.279	0.019	0.0396	0.0029	0.7496	249.86	7.54	250.35	8.99	245.3	57.9		250.39	8.99	249.95	7.47	-0.26
DZ06_59	473	1.98		0.052	0.0026	0.293	0.013	0.0396	0.0017	0.30095	260.92	5.1	250.35	5.27	356.9	58.3		249.6	5.26	255.84	4.2	5
DZ06_60	382	0.894		0.0579	0.0036	0.323	0.022	0.0399	0.0025	0.47982	284.21	8.44	252.21	7.75	556.4	72.9		249.89	7.68	265.04	7.04	14
DZ06_64	600	6.13		0.0565	0.003	0.337	0.017	0.0431	0.0022	0.54379	294.9	6.46	272.02	6.8	480.2	53.6		270.34	6.76	284.48	5.89	9.8
DZ06_57	306	0.999		0.0586	0.0041	0.385	0.027	0.0443	0.0017	0.29785	330.71	9.9	279.43	5.25	709.3	73.6		275.59	5.18	285.22	5.15	19
DZ06_71	348	2.66		0.0525	0.0022	0.34	0.016	0.0474	0.0031	0.66111	297.17	6.06	298.54	9.54	286.4	56.3		298.64	9.54	297.13	6.06	-0.67
DZ06_103	690	1.486		0.0525	0.0021	0.358	0.018	0.0467	0.0015	0.43172	310.72	6.73	294.23	4.62	436.4	51.8		293	4.6	297.38	4.47	6.3
DZ06_107	359	2.08		0.0537	0.0029	0.35	0.017	0.0479	0.0022	0.40527	304.72	6.39	301.62	6.77	328.6	58.5		301.38	6.76	303.31	5.51	1.3
DZ06_84	276	1.479		0.0497	0.0021	0.384	0.019	0.0456	0.0023	0.63441	329.98	6.97	287.45	7.09	641.9	45.9		284.26	7.01	308.42	6.54	17
DZ06_78	126	1.053		0.0576	0.0036	0.398	0.031	0.0475	0.0031	0.60785	340.2	11.3	299.15	9.54	631.1	69.3		296.05	9.44	309.91	9.35	15
DZ06_25	484	1.82		0.057	0.0035	0.36	0.024	0.0493	0.003	0.60549	312.21	8.96	310.22	9.22	327.1	64.5		310.07	9.21	311.29	8.15	0.78
DZ06_2	726	2.24		0.0609	0.0035	0.403	0.034	0.051	0.0029	0.78816	343.8	12.3	320.66	8.89	503.5	58.1		318.89	8.85	317.07	8.93	8.4
DZ06_13	283	1.13		0.0575	0.0028	0.39	0.025	0.0508	0.0032	0.82238	334.37	9.13	319.43	9.82	439.6	42.2		318.3	9.78	329.66	9.14	5.9
DZ06_90	831	7.73		0.0533	0.0023	0.419	0.019	0.0522	0.002	0.453	355.34	6.8	328.01	6.13	537.9	48.3		325.91	6.09	338.72	5.54	9.5
DZ06_104	160	0.684		0.0526	0.0023	0.423	0.028	0.0549	0.0035	0.67124	358.19	9.99	344.5	10.7	447.7	58.6		343.5	10.7	352.64	9.51	4.9
DZ06_101	189	1.64		0.0531	0.0031	0.487	0.032	0.0594	0.0029	0.4908	402.9	10.9	371.98	8.82	584.1	64.7		369.51	8.77	380.62	8.41	9.5
DZ06_43	375	2.41		0.0544	0.0027	0.468	0.032	0.0637	0.0045	0.76699	389.8	11.1	398.1	13.6	341	53.8		398.8	13.7	390.5	11	-3
DZ06_54	537	5.07		0.0573	0.0025	0.501	0.023	0.0592	0.0026	0.59056	412.38	7.78	370.76	7.91	652.5	43.7		367.42	7.84	391.34	7.18	13
DZ06_49	141	1.436		0.0552	0.0026	0.556	0.034	0.0665	0.0036	0.71287	448.9	11.1	415	10.9	626.5	47.6		412.2	10.8	429.7	10.5	9.7
DZ06_20	278	2.75		0.0556	0.0024	0.545	0.028	0.0705	0.0037	0.67927	441.72	9.2	439.2	11.1	455	46.2		439	11.1	441.16	9.04	0.78
DZ06_24	793	1.215		0.066	0.0044	0.599	0.027	0.0715	0.0029	0.13141	476.6	8.57	445.19	8.72	630.8	60.9		442.52	8.67	460.96	6.57	8.6
DZ06_86	231	1.188		0.0546	0.0027	0.669	0.042	0.074	0.0029	0.5245	520.1	12.8	460.21	8.7	792.6	56.4		455	8.61	466.7	8.73	15
DZ06_39	400	1.51		0.0654	0.0042	0.628	0.037	0.0724	0.0032	0.0016048	494.8	11.5	450.6	9.62	705.2	78.3		446.81	9.54	468.27	7.49	12
DZ06_70	796	1.4		0.0576	0.0028	0.625	0.025	0.0762	0.0034	0.4867	492.98	7.81	473.4	10.2	585	46.7		471.7	10.1	487.87	7.5	5.4
DZ06_98	322	1.66		0.0562	0.0024	0.911	0.057	0.0939	0.0053	0.71419	657.6	15.1	578.6	15.6	939	46.5		570.9	15.4	616.4	15.3	17
DZ06_113	260	1.161		0.0635	0.0036	0.958	0.057	0.0956	0.0048	0.10607	682.3	14.8	588.6	14.1	1005	74.7		579.4	13.9	630.7	11.1	19
DZ06_12	117.2	1.108		0.0661	0.0037	0.877	0.053	0.1017	0.0045	0.36622	639.4	14.3	624.4	13.2	692.7	64.4		622.9	13.1	630.8	11.4	3.1
DZ06_34	180	2.99		0.0607	0.0035	0.864	0.055	0.1041	0.0065	0.60682	632.3	15	638.4	19	610.6	60.4		639	19	633.6	14.6	-1.3
DZ06_44	255	1.401		0.0601	0.0028	0.881	0.039	0.1078	0.006	0.51014	641.5	10.5	660	17.5	577.1	54.8		661.8	17.5	642.9	10.4	-4.1
DZ06_40	184	2.06		0.0656	0.0044	0.917	0.079	0.1066	0.0067	0.53373	660.8	20.9	653	19.5	687.5	79.8		652.2	19.5	656.3	17.7	1.6
DZ06_108	511	4.99		0.0604	0.0027	0.926	0.046	0.1122	0.006	0.67958	665.5	12.1	685.5	17.4	598.4	44.9		687.5	17.4	665.9	12	-4.4
DZ06_52	377	1.65		0.0605	0.0028	0.952	0.049	0.1041	0.0051	0.63862	679.1	12.7	638.4	14.9	816.7	44.7		634.3	14.8	666.5	12.6	8.4
DZ06_120	328	0.951		0.062	0.0037	1.105	0.081	0.1149	0.0048	0.55651	755.8	19.5	701.1	13.9	921	62.6		695.4	13.8	707.6	13.9	10
DZ06_48	167	1.058		0.0653	0.0031	1.141	0.047	0.1181	0.0048	0.30592	773	11.1	719.6	13.8	930.4	49.5		713.9	13.7	753.7	10.1	9.8
DZ06_67	54.2	0.629		0.0651	0.0034	1.125	0.097	0.1232	0.0089	0.79037	765.4	23.2	749	25.5	813.6	55.4		747.2	25.5	760.7	23.2	3
DZ06_88	227	1.66		0.0646	0.0034	1.19	0.067	0.1164	0.0062	0.50067	796	15.5	709.8	17.9	1045.5	55.3		700.5	17.7	761.9	15	16
DZ06_72	194	1.215		0.0668	0.0037	1.223	0.067	0.1249	0.0062	0.33468	811.1	15.3	758.7	17.8	957.9	61.7		752.9	17.6	789.9	13.6	9.2
DZ06_5	144	0.394		0.0715	0.0026	1.213	0.068	0.1336	0.0072	0.89788	806.6	15.6	808.4	20.5	801.6	26.1		808.6	20.5	805.7	14.9	-0.4
DZ06_102	89.5	2.72		0.072	0.0031	1.416	0.076	0.1309	0.0044	0.55554	895.7	16	793	12.5	1158.4	44.4		781	12.4	810.6	12.7	17
DZ06_109	508	4.22		0.0711	0.0032	1.272	0.06	0.1244	0.0058	0.57059	833.3	13.4	755.8	16.6	1045.8	43.8		747.2	16.4	810.9	13.4	14
DZ06_74	102	1.006		0.0674	0.0033	1.225	0.085	0.1285	0.0095	0.7447	812.1	19.4	779.3	27.1	902.9	53		775.7	27	813.5	19.7	6.3
DZ06_10	56.1	0.635		0.0729	0.0044	1.248	0.081	0.1339	0.0057	0.42847	822.5	18.3	810.1	16.2	856.2	62.8		808.7	16.2	814.9	14.5	2.1
DZ06_106	68.3	1.104		0.0648	0.0023	1.25	0.073	0.1405	0.0055	0.74	823.4	16.5	847.5	15.5	758.9	41.6		850.2	15.6	837.5	14.6	-4
DZ06_42	624	4.28		0.0684	0.0029	1.29	0.059	0.1404	0.0065	0.62489	841.3	13.1	846.9	18.4	826.5	41.6		847.6	18.4	841.9	13	-0.98
DZ06_14	233	2.6		0.0701	0.0029	1.3	0.12	0.132	0.011	0.86179	845.7	26.5	799.3	31.3	969.7	47.9		794	31.1	847.4	28	8.6
DZ06_32	132.4	0.92		0.07	0.0038	1.382	0.083	0.1466	0.0063	0.42251	881.3	17.7	881.9	17.7	879.8	59.2		881.9	17.7	881.6	14.9	-0.092
DZ06_65	73.3	1.22		0.084	0.01	1.69	0.23	0.1512	0.0063	0.53564	1004.8	43.4	907.7	17.6	1223	117		898.4	17.5	899.1	17.4	16
DZ06_83	209	1.11		0.0688	0.0037	1.557	0.086	0.139	0.0066	0.55798	953.3	17.1	839	18.7	1227.3	47.9		825.1	18.4	900.7	16.8	18
DZ06_69	272	5.91		0.0699	0.003	1.516	0.096	0.1551	0.0088	0.6374	936.9	19.4	929.5	24.6	954.2	52.6		928.6	24.5	935.4	19.1	1.1
DZ06_45	105	2.67		0.0725	0.0037	1.59	0.078	0.1544	0.008	0.46739	966.3	15.3	925.6	22.3	1060.1	52.4		920.4	22.2	958.7	15.1	6.3
DZ06_17	191	1.666		0.0756	0.0043	1.638	0.087	0.1645	0.0097	0.56716	984.9	16.7	981.7	26.8	992.1	53.3		981.3	26.8	984.8	16.7	0.49
DZ06_119	264	1.109		0.07	0.0038	1.91	0.1	0.1746	0.0065	0.52612	1084.6	17.4	1037.4	17.8	1180.6	45		1030.8	17.7	1060.9	15.8	6.5
DZ06_55	300	1.1		0.0744	0.0035	1.96	0.11	0.1811	0.0072	0.6351	1101.9	18.9	1073	19.6	1159.4	43.2		1068.9	19.6	1088.5	17.7	3.9
DZ06_58	423	1.4		0.0772	0.0037	2.11	0.13	0.1886	0.0094	0.63404	1152.1	21.2	1113.8	25.5	1224.9	48		1224.9	48	1141.5	21	5
DZ06_114	200	1.42		0.0831	0.0032	2.72	0.13	0.2042	0.0069	0.60003	1333.9	17.7	1197.8	18.5	1559.6	36.2		1559.6	36.2	1260.1	17.7	17
DZ06_7	88.1	1.139		0.093	0.0042	2.83	0.12	0.236	0.011	0.55771	1363.5	15.9	1365.9	28.7	1359.8	40.5		1359.8	40.5	1363.5	15.9	-0.27
DZ06_63	242	1.17		0.1052	0.0045	3.83	0.29	0.283	0.018	0.73683	1599.1	30.5	1606.5	45.2	1589.4	48.4		1589.4	48.4	1598.4	30.3	-0.75
DZ06_56	346	1.089		0.0998	0.0046	4.07	0.22	0.269	0.015	0.54299	1648.3	22	1535.7	38.1	1795	47.8		1795	47.8	1643.9	22.6	11
DZ06_112	108	1.07		0.0941	0.0061	4.19	0.36	0.293	0.013	0.48438	1672.1	35.2	1656.5	32.4	1691.7	69.4		1691.7	69.4	1662.9	29.2	1.6
DZ06_27	553	12		0.1147	0.0053	4.45	0.19	0.301	0.014	0.64874	1721.7	17.7	1696.3	34.7	1752.8	34.4		1752.8	34.4	1724.7	17.4	2.4	high U/Th
DZ06_11	980	4.82		0.1171	0.0066	4.28	0.48	0.279	0.029	0.82118	1689.5	46.2	1586.3	73.1	1820.1	59.1		1820.1	59.1	1724.7	43.9	11
DZ06_23	378	1.93		0.1481	0.0059	8.02	0.35	0.402	0.022	0.6847	2233.3	19.7	2178.2	50.6	2284.1	34.7		2284.1	34.7	2243.5	18.2	4.2
DZ06_50	586	2.81		0.1375	0.0071	8.42	0.42	0.403	0.018	0.5102	2277.3	22.6	2182.8	41.4	2363.3	40.1		2363.3	40.1	2274	23.1	7.1
DZ06_62	305	1.37		0.1707	0.0091	11.15	0.45	0.479	0.024	0.47844	2535.7	18.8	2522.9	52.3	2546	39.3		2546	39.3	2536.4	18.6	0.86
DZ06_81	361	1.016		0.1603	0.0077	12.6	0.8	0.491	0.038	0.75976	2650.2	29.9	2575	82.1	2708.2	41.7		2708.2	41.7	2668.9	25.1	5
DZ06_117	487	1.33		0.1584	0.006	13.16	0.58	0.511	0.027	0.60231	2691.2	20.8	2660.9	57.6	2714	36.2		2714	36.2	2695	19.9	1.9
DZ06_110	625	1.68		0.1783	0.0082	14.71	0.86	0.559	0.036	0.7564	2796.7	27.8	2862.5	74.4	2749.5	35.5		2749.5	35.5	2780.3	24.3	-4.1
DZ06_100	447	7.5		0.199	0.012	17.1	1.2	0.534	0.024	0.59093	2940.5	33.7	2758.3	50.4	3067.6	45.3		3067.6	45.3	2920.3	36	12
MVDZ06, discordant analyses (excluded from plots and interpretation)
DZ06_87	272	3.51		0.0692	0.0031	1.637	0.073	0.1409	0.0074	0.59721	981	28	849	42	883	92		833	20.5	970.8	14.8	22
DZ06_99	1280	1.27		0.0508	0.0018	0.331	0.016	0.0377	0.0015	0.67783	289	12	238.5	9.4	222	79		234.81	4.59	242.09	4.75	22
DZ06_47	231	1.6		0.054	0.0028	0.1731	0.0098	0.0212	0.0016	0.66296	161.8	8.5	135	10	380	100		133.47	4.98	155.03	4.2	23
DZ06_21	525	1.148		0.0587	0.0045	0.0666	0.0056	0.00808	0.00039	0.32821	65.3	5.3	51.9	2.5	510	150		51.05	1.23	52.81	1.24	24
DZ06_18	141	1.509		0.0649	0.0059	0.416	0.061	0.0449	0.0028	0.5597	333	26	283	17	700	180		279.32	8.52	275.99	8.47	26
DZ06_92	56.4	1.98		0.0627	0.0033	1.285	0.08	0.1131	0.0074	0.69192	834	35	690	43	670	110		674.4	20.9	795.9	19.6	27
DZ06_53	1043	1.12		0.0599	0.0031	0.33	0.015	0.0359	0.0014	0.32749	289	12	227.6	8.7	620	110		222.88	4.27	244.77	4.05	28
DZ06_82	763	1.89		0.0584	0.0022	0.346	0.019	0.0369	0.0017	0.68871	301	14	234	11	529	84		228.63	5.17	233.67	5.43	29
DZ06_96	256	1.407		0.0575	0.0025	0.754	0.025	0.0719	0.0026	0.29989	570	15	448	16	506	92		436.65	7.63	510.9	6.37	31
DZ06_111	201	1.03		0.0866	0.005	2.01	0.18	0.1528	0.0091	0.63276	1108	60	915	51	1330	110		889.1	24.7	932.7	27.4	31
DZ06_95	974	1.22		0.0522	0.0024	0.363	0.014	0.0384	0.0019	0.35655	316	11	243	12	290	100		237.65	5.77	283.79	4.68	32
DZ06_97	478	0.685		0.0733	0.0029	1.68	0.1	0.1314	0.0069	0.68157	996	38	795	39	1006	81		770.5	19.1	868.5	21.2	32
DZ06_85	205	0.643		0.081	0.013	1.87	0.37	0.1443	0.0091	0.6857	1020	100	867	51	1050	220		842.5	24.9	828.6	23.2	35
DZ06_91	194	1.068		0.0589	0.0045	0.444	0.047	0.0424	0.0021	0.54841	369	32	268	13	510	150		261.94	6.36	257.17	6.38	39
DZ06_94	327	0.918		0.061	0.003	0.797	0.044	0.0695	0.0046	0.71796	597	24	432	28	634	97		418.6	13.4	522.7	14.1	41
DZ06_1	135	1.274		0.0785	0.008	0.678	0.096	0.0599	0.0041	0.68475	518	57	375	25	1140	210		362.2	12.1	344.3	11.6	44
DZ06_8	25.5	1.95		0.0928	0.0067	0.549	0.036	0.0482	0.0024	0.046406	442	23	303	15	1440	140		292.2	7.11	336.96	6.61	45
DZ06_118	578	1.93		0.0683	0.0048	0.484	0.025	0.0428	0.0021	-0.27145	400	17	270	13	870	130		260.05	6.25	318.66	4.58	47
DZ06_89	1090	1.25		0.0759	0.0068	0.391	0.024	0.0339	0.0021	0.035436	334	18	215	13	1080	180		206.06	6.28	253.74	5.52	52
DZ06_51	117.2	1.426		0.0903	0.0078	1.07	0.12	0.078	0.0038	0.65596	725	54	484	23	1400	150		459.2	10.8	438.6	10.4	59
DZ06_105	385	0.911		0.11	0.019	1.18	0.25	0.0823	0.0062	0.58938	753	95	509	37	1620	300		489.1	17.7	474.1	17.1	61
DZ06_116	458	0.925		0.085	0.011	0.106	0.014	0.00771	0.00061	-0.63193	102	13	49.5	3.9	1140	260		46.22	1.82	59.44	1.25	77
DZ06_80	906	2.51		0.1039	0.0047	1.604	0.096	0.0984	0.0056	0.77393	983	42	605	33	1693	83		562.8	15.3	464.5	18.2	79
DZ06_3	255	1.61		0.116	0.022	1.33	0.77	0.064	0.023	0.82652	640	220	390	130	1670	300		353	61.7	260.6	49.7	120
DZ06_93	350	1.9		0.1494	0.0089	7.6	1	0.277	0.029	0.91668	2247	99	1630	140	2310	110		2310	110	709.9	50.9	140
DZ06_76	282	1.398		0.308	0.023	3.34	0.35	0.0704	0.0053	0.88655	1462	92	444	31	3470	130		326.9	12	187.77	8.55	210
DZ06_4	557	15.8		0.1614	0.0085	11.17	0.74	0.529	0.033	0.87712	2523	62	2730	140	2465	94		2465	94	2445.1	25	-14
DZ06_30	880	1.7		0.0496	0.002	0.319	0.019	0.0487	0.003	0.79926	280	14	306	18	230	100		308.41	9.28	280.64	7.19	-13
DZ06_36	34	1.304		0.0574	0.0029	0.811	0.059	0.1061	0.0057	0.63267	599	33	649	33	480	110		654.6	16.7	624.8	14.5	-9.8
DZ06_6	161	1.7		0.0599	0.0029	0.81	0.055	0.1044	0.006	0.87009	599	31	639	35	590	110		643.8	17.6	603.2	14.7	-8.9
DZ06_15	168	2.75		0.269	0.014	25.1	1.3	0.714	0.024	0.49194	3312	50	3468	92	3297	82		3297	82	3318.2	24.5	-8.8
DZ06_31	206	3.17		0.0578	0.0028	0.74	0.049	0.0959	0.006	0.80672	560	29	589	35	544	92		592.9	17.7	562.4	14	-7.2
DZ06_38	264	1.7		0.0554	0.0026	0.572	0.026	0.0782	0.002	0.3802	458	17	486	12	420	110		487.59	6.01	478.7	5.58	-6.8
DZ06_22	568	1.61		0.0659	0.0032	1.174	0.06	0.1362	0.0072	0.59794	786	28	822	41	800	110		827	20.5	791.5	13.8	-6.3
DZ06_26	485	1.153		0.1108	0.0051	4.44	0.22	0.319	0.016	0.55453	1723	39	1782	81	1795	84		1795	84	1718.2	20.3	-6
DZ06_29	645	1.51		0.0605	0.0022	0.872	0.058	0.1088	0.0057	0.75394	639	31	665	33	625	74		668.6	16.6	647.4	14.7	-6
DZ06_35	515	1.97		0.0529	0.0032	0.2093	0.0098	0.0319	0.0014	0.38066	192.7	8.2	202.3	8.7	290	130		203.07	4.39	197.2	3.5	-5.7
¶ Data not corrected for common-Pb.
† 206Pb/238U ages common lead corrected by inferring the initial Pb-composition from the Stacey and Kramers (1975) two stage isotope evolution model (Vermeesch, 2018). Analyses with greater than 10% uncertainty in 207Pb/206Pb age (1-sigma) or 5% uncertainty in 206Pb/238U age (1-sigma), 20% discordance, and/or 5% reverse discordance are excluded. Best ages calculated using 206Pb/238U ages for grai…
*Calculated as a single-grain concordia age (Vermeesch, 2021; Geochronology)
** Calculated as the log ratio distance to the concordia composition (Vermeesch, 2021;Geochronology).

## Sheet: Table S4.U-Pb Temora-2 standard
TABLE S4. U-Pb isotopic data (Temora-2 standard)
				Isotope Ratios¶							Apparent Ages¶
	U	U/Th		207Pb	2 sigma	207Pb	2 sigma	206Pb	2 sigma	207Pb/235U v 206Pb/238U	207/235	2 sigma	206/238	2 sigma	207/206	2 sigma		Best age	2 sigma	Concordia	1 sigma	% discordance**
Analysis	(ppm)			206Pb	abs	235U	abs	238U	abs	error corr	age	abs err	age	abs err	age	abs err		age†	abs err	age*	abs err
											Ma	Ma	Ma	Ma	Ma	Ma		Ma	Ma		Ma
Z_Temora2_1	140.3	1.792		0.0552	0.0021	0.509	0.022	0.0677	0.0024	0.63554	417.78	7.4	422.28	7.25	393	38.5		422.28	7.25	420.15	6.6	-1.3
Z_Temora2_2	121	2.339		0.0541	0.0027	0.493	0.027	0.0664	0.0026	0.50286	406.95	9.18	414.43	7.86	364.7	54.9		414.43	7.86	411.81	7.25	-2.2
Z_Temora2_3	110.1	1.742		0.0569	0.0028	0.535	0.034	0.0682	0.0028	0.72019	435.1	11.2	425.3	8.45	487.4	48.9		425.3	8.45	425.67	8.48	2.8
Z_Temora2_4	152	1.755		0.0555	0.0022	0.525	0.027	0.0697	0.0026	0.65731	428.49	8.99	434.35	7.83	397.1	43.6		434.35	7.83	432.53	7.51	-1.6
Z_Temora2_5	65.6	2.388		0.0602	0.0038	0.532	0.031	0.0642	0.0027	0.41983	433.1	10.3	401.12	8.18	607.2	60.3		401.12	8.18	410.55	7.65	9.3
Z_Temora2_6	132.9	1.749		0.0559	0.0027	0.532	0.029	0.0707	0.0032	0.26907	433.14	9.61	440.37	9.63	394.8	68.1		440.37	9.63	436.73	7.64	-2.1
Z_Temora2_8	81.5	2.718		0.0536	0.0027	0.531	0.029	0.0678	0.0023	0.51679	432.47	9.62	422.89	6.94	483.9	52		422.89	6.94	424.67	6.78	2.7
Z_Temora2_9	185	1.557		0.0557	0.0018	0.523	0.024	0.068	0.0024	0.74782	427.15	8	424.1	7.24	443.7	33.9		424.1	7.24	425.02	7.07	0.87
Z_Temora2_10	119	2.136		0.0552	0.0029	0.518	0.027	0.0697	0.0032	0.67632	423.81	9.03	434.35	9.64	366.9	44.9		434.35	9.64	427.95	8.45	-3.1
Z_Temora2_11	140.6	2.585		0.0593	0.0026	0.514	0.022	0.0643	0.0019	0.60648	421.14	7.38	401.72	5.75	528.9	37.5		401.72	5.75	405.39	5.68	5.7
Z_Temora2_12	642	1.77		0.058	0.0028	0.526	0.032	0.0649	0.0029	0.60389	429.2	10.6	405.36	8.78	559	53.6		405.36	8.78	411.24	8.57	6.9
Z_Temora2_13	404	3.158		0.0535	0.0019	0.497	0.023	0.0669	0.0027	0.68299	409.67	7.8	417.45	8.16	366	39.4		417.45	8.16	412.97	7.26	-2.4
Z_Temora2_1	482	1.96		0.0572	0.0018	0.523	0.025	0.0678	0.0023	0.90978	427.15	8.33	422.89	6.94	450.2	24.5		422.89	6.94	421.28	6.86	1.4
Z_Temora2_2	121	2.103		0.0532	0.0032	0.504	0.033	0.0671	0.0023	0.83257	414.4	11.1	418.66	6.95	390.8	46.6		418.66	6.95	420.22	6.5	-1.4
Z_Temora2_3	443	3.1		0.0548	0.0024	0.518	0.024	0.0664	0.0032	0.58893	423.81	8.03	414.43	9.67	475.2	47.4		414.43	9.67	421.14	7.73	2.9
Z_Temora2_4	300	1.838		0.0541	0.0025	0.52	0.025	0.0694	0.003	0.70611	425.15	8.35	432.54	9.04	385.3	39.6		432.54	9.04	427.82	7.94	-2.2
Z_Temora2_5	594	1.607		0.0558	0.0019	0.522	0.019	0.0674	0.0018	0.6272	426.49	6.34	420.47	5.44	459.1	31.7		420.47	5.44	422.24	5.23	1.7
Z_Temora2_6	164	3.3		0.0542	0.0026	0.516	0.031	0.0705	0.0026	0.60245	422.5	10.4	439.17	7.83	332.4	54.4		439.17	7.83	436.07	7.63	-4.7
Z_Temora2_7	623	2.006		0.0553	0.0023	0.508	0.028	0.0656	0.0031	0.48106	417.1	9.43	409.59	9.38	458.9	58.3		409.59	9.38	413.28	8.12	2.2
Z_Temora2_8	361	1.591		0.0551	0.0026	0.511	0.035	0.0646	0.0034	0.94084	419.1	11.8	403.5	10.3	505.8	28.6		403.5	10.3	394	10.4	5.6
Z_Temora2_9	261	2.948		0.0559	0.003	0.518	0.029	0.069	0.0031	0.68749	423.81	9.7	430.13	9.35	389.6	46.2		430.13	9.35	427.31	8.69	-1.8
Z_Temora2_10	603	1.846		0.0544	0.002	0.54	0.028	0.0707	0.0031	0.81063	438.42	9.23	440.37	9.33	428.2	33.9		440.37	9.33	439.34	8.81	-0.56
Z_Temora2_11	105	2.75		0.0553	0.0032	0.521	0.049	0.0679	0.0042	0.83425	425.8	16.4	423.5	12.7	438.4	60.6		423.5	12.7	423.1	12.6	0.69
Z_Temora2_12	171.9	1.859		0.0545	0.0029	0.49	0.032	0.0645	0.0032	0.57368	404.9	10.9	402.93	9.69	416.2	61.3		402.93	9.69	403.65	9.05	0.59
Z_Temora2_1	88.5	2.821		0.0547	0.0026	0.488	0.027	0.0625	0.003	0.66689	403.55	9.21	390.81	9.1	477.1	47.2		390.81	9.1	396.81	8.44	3.9
Z_Temora2_2	259	1.751		0.0576	0.0027	0.506	0.031	0.0644	0.0048	0.29391	415.8	10.5	402.3	14.5	491	89.8		402.3	14.5	411.97	9.59	4.3
Z_Temora2_3	184	3.2		0.0557	0.0023	0.551	0.027	0.0686	0.0026	0.60087	445.65	8.84	427.72	7.84	539.3	43.8		427.72	7.84	433.8	7.46	5
Z_Temora2_4	181.6	1.594		0.0548	0.0029	0.508	0.029	0.0684	0.0027	0.58314	417.1	9.76	426.51	8.15	365.4	52.7		426.51	8.15	423.72	7.74	-2.7
Z_Temora2_5	263	1.669		0.0552	0.0019	0.501	0.026	0.0644	0.0029	0.74175	412.38	8.79	402.33	8.78	469	39.2		402.33	8.78	407.22	8.28	3
Z_Temora2_6	209	1.921		0.0548	0.0029	0.528	0.034	0.0698	0.004	0.97127	430.5	11.3	435	12.1	406.6	18.1		435	12.1	428.1	10.9	-1.9
Z_Temora2_7	526	2.003		0.0557	0.002	0.52	0.019	0.068	0.0019	0.36329	425.15	6.35	424.1	5.73	430.9	41.3		424.1	5.73	424.54	4.96	0.3
Z_Temora2_8	247	1.769		0.0552	0.0023	0.539	0.035	0.0711	0.0044	0.64095	437.8	11.5	442.8	13.2	411.5	60.2		442.8	13.2	439.3	11	-1.5
Z_Temora2_9	242	3.406		0.0552	0.0022	0.506	0.022	0.0676	0.0026	0.52067	415.76	7.42	421.68	7.85	383	45.3		421.68	7.85	418.35	6.62	-1.8
Z_Temora2_10	118.2	2.686		0.0596	0.0033	0.563	0.036	0.0696	0.0036	0.48776	453.5	11.7	433.7	10.8	554.8	64.9		433.7	10.8	441.96	9.78	5.5
Z_Temora2_11	297	1.629		0.0559	0.0023	0.533	0.024	0.0688	0.003	0.60094	433.8	7.95	428.92	9.05	459.8	43.9		428.92	9.05	432.13	7.53	1.5
Z_Temora2_1	94.4	2.826		0.0586	0.0033	0.528	0.037	0.0651	0.0028	0.4057	430.5	12.3	406.57	8.47	560.6	71.6		406.57	8.47	411.41	8.16	6.9
Z_Temora2_2	134	3.31		0.0538	0.0029	0.527	0.035	0.0691	0.0032	0.71861	429.8	11.6	430.73	9.65	424.9	51.5		430.73	9.65	430.56	9.52	-0.26
Z_Temora2_3	413	3.41		0.057	0.002	0.512	0.019	0.0661	0.0029	0.77103	419.79	6.38	412.62	8.77	459.4	31.2		412.62	8.77	420.34	6.39	2.6
Z_Temora2_4	274	3.14		0.0564	0.0019	0.512	0.022	0.0655	0.0029	0.76738	419.79	7.39	408.99	8.77	479.6	32.9		408.99	8.77	418.1	7.4	3.6
Z_Temora2_5	402	2.471		0.055	0.0018	0.507	0.02	0.0666	0.0027	0.74278	416.43	6.74	415.64	8.16	420.8	32		415.64	8.16	416.31	6.69	0.26
Z_Temora2_6	184.9	2.555		0.057	0.002	0.57	0.027	0.0692	0.0024	0.72314	458.01	8.73	431.33	7.24	594.2	35.5		431.33	7.24	435.24	7.28	7.3
Z_Temora2_7	135.4	1.817		0.056	0.0028	0.512	0.028	0.0662	0.0032	0.53737	419.79	9.4	413.22	9.67	456.1	55.3		413.22	9.67	416.69	8.39	2
Z_Temora2_8	497	2.171		0.0544	0.002	0.485	0.021	0.0649	0.0028	0.76623	401.5	7.18	405.36	8.47	379.4	33.2		405.36	8.47	402.12	7.1	-1.3
Z_Temora2_9	219	1.709		0.0548	0.0024	0.525	0.035	0.0715	0.0034	0.68246	428.5	11.7	445.2	10.2	339.6	55.2		445.2	10.2	439.91	9.77	-4.6
Z_Temora2_10	473	2.003		0.0552	0.0016	0.515	0.019	0.067	0.0026	0.78861	421.81	6.37	418.06	7.85	442.4	27.4		418.06	7.85	421.62	6.38	1.3
Z_Temora2_11	171	2.466		0.0562	0.0024	0.549	0.028	0.0713	0.0031	0.64438	444.34	9.18	443.98	9.33	446.2	44.9		443.98	9.33	444.17	8.39	0.1
Z_Temora2_12	164.5	1.653		0.0567	0.0022	0.531	0.029	0.0669	0.0031	0.64589	432.47	9.62	417.45	9.37	513.3	47.4		417.45	9.37	424.22	8.7	4.4
Z_Temora2_13	124	1.975		0.0536	0.0026	0.497	0.023	0.0675	0.0025	0.85841	409.67	7.8	421.08	7.55	345.9	27		421.08	7.55	416.41	7.26	-3.3
Z_Temora2_14	411	1.915		0.058	0.0016	0.518	0.019	0.0661	0.002	0.72325	423.81	6.35	412.62	6.05	485.2	28.3		412.62	6.05	417.08	5.8	3.3
Z_Temora2_15	142.7	2.593		0.0547	0.0025	0.511	0.026	0.0681	0.0033	0.79927	419.12	8.74	424.7	9.96	388.5	35.4		424.7	9.96	420.14	8.62	-1.8
Z_Temora2_1	379	1.67		0.0559	0.002	0.508	0.023	0.064	0.0025	0.81567	417.1	7.74	399.91	7.57	513.4	28.9		399.91	7.57	406.98	7.45	5.1
Z_Temora2_2	193.8	1.443		0.0542	0.0021	0.489	0.019	0.0625	0.0028	0.60456	404.23	6.48	390.81	8.49	481.6	41.5		390.81	8.49	401.72	6.4	4.6
Z_Temora2_3	141.7	3.78		0.0569	0.0029	0.484	0.034	0.0671	0.0043	0.91533	400.8	11.6	418.7	13	299.2	32.3		418.7	13	398.8	11.2	-6.7
Z_Temora2_4	162.3	2.87		0.0572	0.0033	0.485	0.025	0.066	0.0026	0.10648	401.5	8.55	412.01	7.86	341.4	69.6		412.01	7.86	407.22	6.06	-3.2
Z_Temora2_5	401	4.72		0.055	0.0032	0.508	0.031	0.0656	0.0036	0.67087	417.1	10.4	409.6	10.9	458.9	52.5		409.6	10.9	413.79	9.78	2.3
Z_Temora2_6	252	1.248		0.0564	0.0032	0.53	0.028	0.0672	0.0036	0.43719	431.81	9.29	419.3	10.9	499.3	62.2		419.3	10.9	427.21	8.48	3.8
Z_Temora2_7	292	1.218		0.0562	0.003	0.533	0.032	0.0675	0.0034	0.6369	433.8	10.6	421.1	10.3	501.9	52.7		421.1	10.3	426.76	9.51	3.7
Z_Temora2_8	187.1	3.59		0.0568	0.0029	0.512	0.027	0.0662	0.0031	0.39118	419.79	9.07	413.22	9.37	456.1	61.2		413.22	9.37	416.67	7.71	2
Z_Temora2_9	209	4.09		0.056	0.0027	0.518	0.025	0.068	0.0028	0.53535	423.81	8.36	424.1	8.45	422.3	48.6		424.1	8.45	423.95	7.36	-0.082
Z_Temora2_10	173.7	3.05		0.0538	0.0032	0.503	0.034	0.0647	0.0038	0.60656	413.7	11.5	404.1	11.5	467.6	62.7		404.1	11.5	408.9	10.4	2.9
Z_Temora2_11	123.7	3.05		0.0557	0.0032	0.509	0.029	0.0659	0.0031	0.57923	417.78	9.76	411.41	9.37	453.1	53.9		411.41	9.37	414.26	8.52	1.9
Z_Temora2_12	352	2.07		0.0565	0.0032	0.51	0.025	0.0665	0.0036	0.5305	418.45	8.41	415	10.9	437.3	55.9		415	10.9	417.62	8.09	1.1
Z_Temora2_13	198	2.191		0.0602	0.0031	0.556	0.025	0.0689	0.0032	0.38733	448.92	8.16	429.53	9.65	549.5	55.3		429.53	9.65	441.72	7.37	5.7
Z_Temora2_14	112.9	3.48		0.0575	0.0035	0.492	0.028	0.0647	0.0032	0.43414	406.27	9.53	404.15	9.69	418.4	63.6		404.15	9.69	405.24	8.14	0.65
Z_Temora2_15	337	1.985		0.0581	0.0032	0.524	0.029	0.0675	0.003	0.15411	427.82	9.66	421.08	9.06	464.3	72.5		421.08	9.06	424.18	7.11	2
Z_Temora2_16	147	2.13		0.0588	0.0041	0.57	0.034	0.0682	0.0044	0.5029	458	11	425.3	13.3	625.6	66.9		425.3	13.3	447.3	10.5	9.7
Z_Temora2_1	77.2	2.72		0.0529	0.0037	0.496	0.035	0.067	0.0032	0.19225	409	11.9	418.06	9.67	358.1	87.2		418.06	9.67	414.63	8.14	-2.7
Z_Temora2_2	149.9	2.7		0.0553	0.0028	0.511	0.03	0.0662	0.0033	0.61852	419.1	10.1	413.22	9.98	451.7	53.4		413.22	9.98	416.07	9.05	1.8
Z_Temora2_3	166.9	2.74		0.053	0.0037	0.522	0.026	0.0715	0.0042	0.5277	426.49	8.67	445.2	12.6	326.6	60.5		445.2	12.6	429.15	8.47	-5.9
Z_Temora2_4	446	1.749		0.0568	0.0033	0.522	0.03	0.065	0.0026	0.90345	426.5	10	405.96	7.87	539	29.9		405.96	7.87	394.94	7.67	7.1
Z_Temora2_5	129.8	2.49		0.0569	0.003	0.518	0.029	0.068	0.0029	0.55327	423.81	9.7	424.1	8.75	422.3	53.6		424.1	8.75	423.99	8.07	-0.081
Z_Temora2_6	207	3.36		0.0553	0.0032	0.536	0.038	0.068	0.0039	0.37547	435.8	12.6	424.1	11.8	498	79.9		424.1	11.8	429.3	10.1	3.3
Z_Temora2_7	433	2.78		0.0558	0.0026	0.533	0.025	0.067	0.0032	0.52917	433.8	8.28	418.06	9.67	518.3	50.4		418.06	9.67	428.37	7.79	4.8
Z_Temora2_8	184	2.196		0.0552	0.0029	0.5	0.029	0.0647	0.0033	0.57252	411.7	9.82	404.15	9.99	454.3	56.3		404.15	9.99	408.05	8.82	2.3
Z_Temora2_9	191	1.59		0.0557	0.0034	0.504	0.028	0.0642	0.0039	0.50439	414.41	9.45	401.1	11.8	489.1	64.1		401.1	11.8	410.58	9	4.3
Z_Temora2_10	330	1.423		0.0557	0.0029	0.501	0.024	0.064	0.0041	0.60846	412.38	8.12	399.9	12.4	482.8	57		399.9	12.4	411.78	8.14	4.4
Z_Temora2_11	366	2.48		0.0573	0.0032	0.505	0.031	0.0647	0.0034	0.66453	415.1	10.5	404.1	10.3	476.3	52.4		404.1	10.3	409.26	9.54	3.3
Z_Temora2_12	293	1.538		0.0561	0.003	0.472	0.026	0.0619	0.004	0.64322	392.57	8.97	387.2	12.1	424.5	57.2		387.2	12.1	391.92	8.92	1.9
Z_Temora2_1	158	2.44		0.0512	0.0028	0.523	0.03	0.0727	0.0033	0.21301	427.2	10	452.4	9.92	293.1	74.4		452.4	9.92	439.73	7.68	-7.1
Z_Temora2_2	522	1.76		0.0548	0.0028	0.482	0.028	0.0636	0.0037	0.59171	399.44	9.59	397.5	11.2	410.8	58.7		397.5	11.2	398.83	9.13	0.64
Z_Temora2_3	170.8	1.44		0.0514	0.003	0.475	0.027	0.0644	0.0033	0.8364	394.64	9.29	402.33	9.99	349.8	35.5		402.33	9.99	396.74	9.07	-2.5
Z_Temora2_4	100.3	3.09		0.0516	0.0027	0.524	0.024	0.0731	0.0039	0.16792	427.82	8	454.8	11.7	284.9	73.4		454.8	11.7	435.37	7.03	-8.1
Z_Temora2_5	141.2	2		0.0552	0.003	0.526	0.027	0.0701	0.0041	0.38274	429.15	8.98	436.8	12.3	388.5	68.8		436.8	12.3	431.1	8.39	-2.3
Z_Temora2_6	91.2	1.72		0.056	0.0043	0.515	0.033	0.0678	0.0038	0.23587	421.8	11.1	422.9	11.5	415.9	83.3		422.9	11.5	422.32	8.85	-0.32
Z_Temora2_7	67	2.24		0.056	0.003	0.489	0.023	0.064	0.0032	-0.031626	404.23	7.84	399.91	9.69	429	77.7		399.91	9.69	402.5	6.01	1.4
Z_Temora2_8	79.2	2.46		0.0528	0.0022	0.467	0.028	0.0628	0.0041	0.67765	389.11	9.69	392.6	12.4	368.3	56.9		392.6	12.4	389.62	9.58	-1.2
Z_Temora2_9	109.9	1.6		0.0549	0.0023	0.517	0.026	0.0676	0.0036	0.70117	423.15	8.7	421.7	10.9	431.1	44.7		421.7	10.9	422.92	8.63	0.48
Z_Temora2_10	131.3	2.78		0.0554	0.0025	0.52	0.024	0.069	0.0035	0.43847	425.15	8.02	430.1	10.6	398.3	57.7		430.1	10.6	426.48	7.53	-1.5
Z_Temora2_11	107.5	3.11		0.0557	0.0035	0.492	0.029	0.0633	0.0036	0.26387	406.27	9.87	395.7	10.9	467	77.8		395.7	10.9	401.66	8.25	3.3
Z_Temora2_12	74.8	2.23		0.0562	0.0041	0.527	0.036	0.0685	0.0036	0.087421	429.8	12	427.1	10.9	444.3	91.7		427.1	10.9	428.32	8.39	0.78
Z_Temora2_13	162	2.99		0.0556	0.0032	0.533	0.026	0.0696	0.0037	0.093435	433.8	8.61	433.7	11.1	434.1	76.5		433.7	11.1	433.78	7.11	0.016
Z_Temora2_14	139	1.9		0.057	0.0033	0.498	0.022	0.0638	0.0038	0.45452	410.35	7.46	398.7	11.5	476.4	61.6		398.7	11.5	408.57	7.31	4
Z_Temora2_15	101.6	2.7		0.058	0.0027	0.535	0.027	0.0672	0.0036	0.4083	435.12	8.93	419.3	10.9	519.9	62.2		419.3	10.9	429.69	8.19	4.8
Z_Temora2_16	127	3.32		0.0561	0.003	0.474	0.028	0.0627	0.0038	0.44649	393.95	9.64	392	11.5	405.3	70.5		392	11.5	393.29	8.85	0.63
Z_Temora2_1	290.5	1.83		0.0529	0.0019	0.459	0.017	0.0633	0.0025	0.88955	383.56	5.92	395.66	7.58	311.2	20.6		395.66	7.58	378.95	5.71	-5.4
Z_Temora2_2	156	3.01		0.0578	0.0034	0.506	0.043	0.0646	0.0039	0.70697	415.8	14.5	403.5	11.8	484.1	66.4		403.5	11.8	405.5	11.8	3.6
Z_Temora2_3	191	1.93		0.061	0.0031	0.546	0.024	0.0677	0.0031	0.63883	442.37	7.88	422.28	9.36	548.3	41.7		422.28	9.36	436.76	7.71	6.1
Z_Temora2_5	402	1.643		0.057	0.0031	0.502	0.024	0.0635	0.003	0.52332	413.06	8.11	396.88	9.09	504.5	51.1		396.88	9.09	406.77	7.51	5.1
Z_Temora2_6	387	2.82		0.0557	0.0022	0.508	0.026	0.0657	0.0028	0.5638	417.1	8.75	410.2	8.47	455.5	49.3		410.2	8.47	413.36	7.64	2.1
Z_Temora2_7	119.2	3.22		0.0568	0.0029	0.504	0.027	0.0649	0.002	0.24059	414.41	9.11	405.36	6.05	465.1	60.9		405.36	6.05	407.6	5.56	2.6
Z_Temora2_8	501	1.81		0.0534	0.0029	0.468	0.017	0.0646	0.0026	0.040303	389.81	5.88	403.54	7.87	309.1	60.5		403.54	7.87	394.62	4.78	-4.4
Z_Temora2_9	388	1.733		0.0565	0.003	0.49	0.021	0.0643	0.0035	0.66122	404.91	7.16	401.7	10.6	423.1	46.2		401.7	10.6	404.86	7.16	1.1
Z_Temora2_10	142	3.32		0.0561	0.0033	0.503	0.033	0.065	0.0042	0.5502	413.7	11.1	406	12.7	457.3	68.5		406	12.7	410.9	10.4	2.4
Z_Temora2_11	116	3.69		0.057	0.0031	0.505	0.02	0.0647	0.0021	0.25349	415.08	6.75	404.15	6.36	476.3	49.1		404.15	6.36	409.14	5.2	3.3
Z_Temora2_12	118.6	1.98		0.0599	0.0035	0.54	0.022	0.0666	0.0042	0.40773	438.42	7.25	415.6	12.7	559.9	64.9		415.6	12.7	435.89	7.18	7.5
Z_Temora2_13	187	3.65		0.0559	0.0028	0.501	0.025	0.0661	0.0019	0.21681	412.38	8.46	412.62	5.74	411.1	58		412.62	5.74	412.55	5.19	-0.069
Z_Temora2_14	140	2.41		0.0607	0.0035	0.571	0.025	0.0682	0.0028	0.19757	458.66	8.08	425.3	8.45	629.4	57.9		425.3	8.45	442.6	6.47	9.5
Z_Temora2_15	155	2.78		0.0589	0.0032	0.541	0.02	0.0675	0.0023	-0.1056	439.08	6.59	421.08	6.94	534.6	57.9		421.08	6.94	430.45	4.54	5.2
Z_Temora2_16	132	2.62		0.0615	0.003	0.527	0.026	0.0632	0.0037	0.94928	429.82	8.64	395.1	11.2	620.7	21		395.1	11.2	468.34	7.35	19
¶ Data not corrected for common-Pb.
† 206Pb/238U ages common lead corrected by inferring the initial Pb-composition from the Stacey and Kramers (1975) two stage isotope evolution model (Vermeesch, 2018). Analyses with greater than 10% uncertainty in 207Pb/206Pb age (1-sigma) or 5% uncertainty in 206Pb/238U age (1-sigma), 20% discordance, and/or 5% reverse discordance are excluded. Best ages calculated using 206Pb/238U ages for grai…
*Calculated as a single-grain concordia age (Vermeesch, 2021; Geochronology)
** Calculated as the log ratio distance to the concordia composition (Vermeesch, 2021;Geochronology).
References cited
Stacey, J.S., and Kramers, J.D., 1975, Approximation of terrestrial lead isotope evolution by a two-stage model: Earth and Planetary Science Letters, v. 26, p. 207–221, doi:10.1016/0012-821X(75)90088-6.
Vermeesch, 2018--need to add
Vermeesch, P., 2021, On the treatment of discordant detrital zircon U–Pb data: Geochronology, v. 3, p. 247–257, doi:10.5194/gchron-3-247-2021.

## Sheet: Table S5. DZ data statistics 
	Cross Correlation Coefficient
	DZ05	DZ04	DZ03	DZ02	DZ01	DZ09	DZ08	DZ07	DZ06
DZ05	1	0.19064	0.559569	0.751207	0.865216	0.719474	0.23922	0.510458	0.706524
DZ04	0.19064	1	0.57238	0.33671	0.33855	0.343954	0.131486	0.573977	0.101724
DZ03	0.559569	0.57238	1	0.74874	0.599512	0.492525	0.14599	0.737285	0.327179
DZ02	0.751207	0.33671	0.74874	1	0.723469	0.587917	0.20797	0.587075	0.561703
DZ01	0.865216	0.33855	0.599512	0.723469	1	0.712873	0.402233	0.528285	0.531077
DZ09	0.719474	0.343954	0.492525	0.587917	0.712873	1	0.364497	0.731004	0.612032
DZ08	0.23922	0.131486	0.14599	0.20797	0.402233	0.364497	1	0.204226	0.289199
DZ07	0.510458	0.573977	0.737285	0.587075	0.528285	0.731004	0.204226	1	0.41292
DZ06	0.706524	0.101724	0.327179	0.561703	0.531077	0.612032	0.289199	0.41292	1
	Likeness value
	DZ05	DZ04	DZ03	DZ02	DZ01	DZ09	DZ08	DZ07	DZ06
DZ05	1	0.439876	0.653124	0.715064	0.800884	0.689601	0.567086	0.63384	0.713607
DZ04	0.439876	1	0.57247	0.508297	0.476244	0.548636	0.378043	0.631562	0.430627
DZ03	0.653124	0.57247	1	0.740482	0.622071	0.62434	0.453484	0.714477	0.571416
DZ02	0.715064	0.508297	0.740482	1	0.698559	0.64838	0.518998	0.670182	0.640073
DZ01	0.800884	0.476244	0.622071	0.698559	1	0.690698	0.621083	0.632453	0.642053
DZ09	0.689601	0.548636	0.62434	0.64838	0.690698	1	0.60656	0.767196	0.691246
DZ08	0.567086	0.378043	0.453484	0.518998	0.621083	0.60656	1	0.532186	0.585453
DZ07	0.63384	0.631562	0.714477	0.670182	0.632453	0.767196	0.532186	1	0.635789
DZ06	0.713607	0.430627	0.571416	0.640073	0.642053	0.691246	0.585453	0.635789	1
	Similarity value
	DZ05	DZ04	DZ03	DZ02	DZ01	DZ09	DZ08	DZ07	DZ06
DZ05	1.00024	0.720785	0.886824	0.910595	0.946415	0.911584	0.803632	0.890611	0.894521
DZ04	0.720785	1.00025	0.803987	0.756086	0.725425	0.786144	0.673178	0.827382	0.694403
DZ03	0.886824	0.803987	1.00024	0.911805	0.849247	0.868279	0.740573	0.900308	0.841231
DZ02	0.910595	0.756086	0.911805	1.00024	0.892423	0.87678	0.775907	0.890933	0.863671
DZ01	0.946415	0.725425	0.849247	0.892423	1.00025	0.898074	0.874358	0.89409	0.868947
DZ09	0.911584	0.786144	0.868279	0.87678	0.898074	1.00024	0.857248	0.942968	0.92148
DZ08	0.803632	0.673178	0.740573	0.775907	0.874358	0.857248	1.00025	0.829032	0.830435
DZ07	0.890611	0.827382	0.900308	0.890933	0.89409	0.942968	0.829032	1.00025	0.88011
DZ06	0.894521	0.694403	0.841231	0.863671	0.868947	0.92148	0.830435	0.88011	1.00024
	K-S test p value
	DZ05	DZ04	DZ03	DZ02	DZ01	DZ09	DZ08	DZ07	DZ06
DZ05	1	5.24661e-07	0.0667355	0.549347	0.337808	0.0963473	0.0124497	0.000158199	0.0124497
DZ04	5.24661e-07	1	0.000951813	4.3059e-05	2.33854e-07	0.00283492	1.15265e-06	0.549347	7.48269e-09
DZ03	0.0667355	0.000951813	1	0.436566	0.0300604	0.0667355	0.000534422	0.0452624	0.00165998
DZ02	0.549347	4.3059e-05	0.436566	1	0.188456	0.00776369	0.0124497	0.00165998	0.00165998
DZ01	0.337808	2.33854e-07	0.0300604	0.188456	1	0.00474091	0.00474091	2.17681e-05	0.0195495
DZ09	0.0963473	0.00283492	0.0667355	0.00776369	0.00474091	1	4.3059e-05	0.255173	0.00283492
DZ08	0.0124497	1.15265e-06	0.000534422	0.0124497	0.00474091	4.3059e-05	1	4.36246e-08	0.0452624
DZ07	0.000158199	0.549347	0.0452624	0.00165998	2.17681e-05	0.255173	4.36246e-08	1	2.47971e-06
DZ06	0.0124497	7.48269e-09	0.00165998	0.00165998	0.0195495	0.00283492	0.0452624	2.47971e-06	1
	K-S test D statistic
	DZ05	DZ04	DZ03	DZ02	DZ01	DZ09	DZ08	DZ07	DZ06
DZ05	0	0.383838	0.181818	0.111111	0.131313	0.171717	0.222222	0.30303	0.222222
DZ04	0.383838	0	0.272727	0.323232	0.393939	0.252525	0.373737	0.111111	0.434343
DZ03	0.181818	0.272727	0	0.121212	0.20202	0.181818	0.282828	0.191919	0.262626
DZ02	0.111111	0.323232	0.121212	0	0.151515	0.232323	0.222222	0.262626	0.262626
DZ01	0.131313	0.393939	0.20202	0.151515	0	0.242424	0.242424	0.333333	0.212121
DZ09	0.171717	0.252525	0.181818	0.232323	0.242424	0	0.323232	0.141414	0.252525
DZ08	0.222222	0.373737	0.282828	0.222222	0.242424	0.323232	0	0.414141	0.191919
DZ07	0.30303	0.111111	0.191919	0.262626	0.333333	0.141414	0.414141	0	0.363636
DZ06	0.222222	0.434343	0.262626	0.262626	0.212121	0.252525	0.191919	0.363636	0
	Kuiper test p value
	DZ05	DZ04	DZ03	DZ02	DZ01	DZ09	DZ08	DZ07	DZ06
DZ05	1	2.14837e-07	0.00435521	0.153124	0.475025	0.153124	1.16612e-06	1.24454e-05	0.0316448
DZ04	2.14837e-07	1	0.00435521	0.000108146	2.62636e-06	0.000108146	1.16612e-06	0.475025	8.91537e-08
DZ03	0.00435521	0.00435521	1	0.0733683	0.00741873	0.0733683	5.78256e-06	0.0733683	0.00741873
DZ02	0.153124	0.000108146	0.0733683	1	0.21232	0.00741873	5.38264e-05	0.00435521	0.000763051
DZ01	0.475025	2.62636e-06	0.00741873	0.21232	1	0.0316448	0.000407237	0.000108146	0.000407237
DZ09	0.153124	0.000108146	0.0733683	0.00741873	0.0316448	1	2.61806e-05	0.048809	0.012333
DZ08	1.16612e-06	1.16612e-06	5.78256e-06	5.38264e-05	0.000407237	2.61806e-05	1	2.14837e-07	2.61806e-05
DZ07	1.24454e-05	0.475025	0.0733683	0.00435521	0.000108146	0.048809	2.14837e-07	1	1.16612e-06
DZ06	0.0316448	8.91537e-08	0.00741873	0.000763051	0.000407237	0.012333	2.61806e-05	1.16612e-06	1
	Kuiper test V statistic
	DZ05	DZ04	DZ03	DZ02	DZ01	DZ09	DZ08	DZ07	DZ06
DZ05	0	0.434343	0.292929	0.212121	0.171717	0.212121	0.414141	0.383838	0.252525
DZ04	0.434343	0	0.292929	0.353535	0.40404	0.353535	0.414141	0.171717	0.444444
DZ03	0.292929	0.292929	0	0.232323	0.282828	0.232323	0.393939	0.232323	0.282828
DZ02	0.212121	0.353535	0.232323	0	0.20202	0.282828	0.363636	0.292929	0.323232
DZ01	0.171717	0.40404	0.282828	0.20202	0	0.252525	0.333333	0.353535	0.333333
DZ09	0.212121	0.353535	0.232323	0.282828	0.252525	0	0.373737	0.242424	0.272727
DZ08	0.414141	0.414141	0.393939	0.363636	0.333333	0.373737	0	0.434343	0.373737
DZ07	0.383838	0.171717	0.232323	0.292929	0.353535	0.242424	0.434343	0	0.414141
DZ06	0.252525	0.444444	0.282828	0.323232	0.333333	0.272727	0.373737	0.414141	0

## Sheet: Table S6. Location of DZ
TABLE S6. Location of detrital zircon samples
Sample	Stratigraphic Level (m.)	Sample	Coordinates (˚N)	Coordinates (˚E)	Type
Detrital zircons	3454	16KNDZ05	39.9419	77.2322	FLUVIAL
Detrital zircons	2895	16KNDZ04	39.9346	77.2246	FLUVIAL
Detrital zircons	2059	16KNDZ03	39.9231	77.2074	FLUVIAL
Detrital zircons	1713	16KNDZ02	39.9162	77.2218	AEOLIAN
Detrital zircons	1230	16KNDZ01	39.9089	77.2192	AEOLIAN
Detrital zircons	893	16KNDZ09	39.9024	77.2265	FLUVIAL
Detrital zircons	712	16KNDZ08	39.8978	77.2313	AEOLIAN
Detrital zircons	430	16KNDZ07	39.8923	77.2385	FLUVIAL
Detrital zircons	241	16KNDZ06	39.8856	77.2451	FLUVIAL
